# Supplementary material for: Copper catalysed protoboration of allenyl-Bdans: efficient synthesis of β-boryl allyl-Bdans
Source: Royal Society of Chemistry journal article supplement (doi:10.1039/d2ob01694j), 2022-01-01

## Supporting information

### **Copper Catalysed Protoboration of Allenyl-Bdans: Efficient Synthesis of $\beta$ -Boryl Allyl-Bdans**

Shi-Sen Li, Qin Zhong\* and Jian Zhao\*

Department of Chemical Engineering, School of Chemistry and Chemical Engineering, Nanjing University of Science and Technology, Nanjing 210094, China.

Email: zq304@njust.edu.cn; jzhao@njust.edu.cn

## Table of Contents

|                                                                                                       |    |
|-------------------------------------------------------------------------------------------------------|----|
| General information .....                                                                             | 1  |
| Materials .....                                                                                       | 1  |
| Detailed optimization of reaction conditions: Table <b>S1</b> .....                                   | 2  |
| Experimental Procedures and Spectral Data.....                                                        | 3  |
| 1. Synthesis of Allenyl-Bdan derivatives <b>1</b> .....                                               | 3  |
| 2. Synthesis of $\beta$ -Boryl Allyl-Bdan derivatives <b>3</b> .....                                  | 8  |
| 3. Determination of the stereochemistry of <b>3e</b> using a NOESY spectrum .....                     | 13 |
| 4. Synthesis of reported compound <b>5</b> .....                                                      | 14 |
| 5. Procedure for Suzuki-Miyaura cross-coupling of Methyl 4-iodobenzoate <b>6</b> with <b>3f</b> ..... | 14 |
| 6. References .....                                                                                   | 15 |
| 7. NMR Spectra of <b>1</b> , <b>3</b> , <b>5</b> and <b>7</b> .....                                   | 16 |

**General Information.**  $^1\text{H}$  NMR and  $^{13}\text{C}$  NMR spectra were recorded on BRUKER AVANCE III (500 MHz) spectrometers.  $^1\text{H}$  NMR spectra are reported as follows: chemical shift in ppm ( $\delta$ ) relative to the chemical shift of  $\text{CDCl}_3$  at 7.26 ppm, integration, multiplicities (s = singlet, d = doublet, t = triplet, m = multiplet, appt = apparently triplet), and coupling constants (Hz).  $^{13}\text{C}$  NMR spectra were recorded on BRUKER AVANCE III (126 MHz) spectrometers with complete proton decoupling, and chemical shift reported in ppm ( $\delta$ ) relative to the central line of triplet for  $\text{CDCl}_3$  at 77.0 ppm. High resolution mass spectra (HRMS) were obtained on a BRUKER autoflex maX MALDI-TOF(TOF) instrument. Column chromatography and filtration via silica plug were carried out employing silica gel (Qingdao Haiyang Chem, neutral, 300-400 Mesh). Analytical thin-layer chromatography (TLC) was performed on 0.2 mm precoated plate Kieselgel 60 F254 (Merck).

**Materials.** Unless otherwise noted, commercially available chemicals were used as received. The structures of new products were determined by  $^1\text{H}$ ,  $^{13}\text{C}$ NMR, and high-resolution mass.

Table S1. Detailed optimization of reaction conditions<sup>a</sup>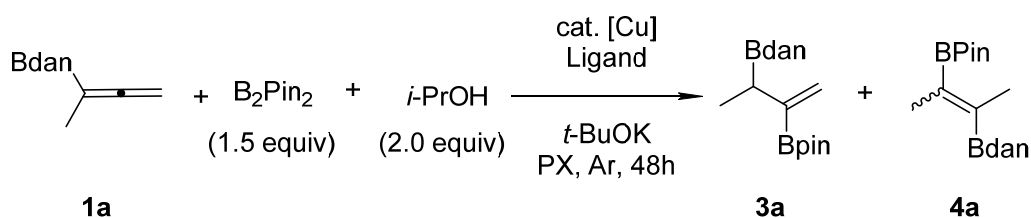

| Entry           | [Cu]/<br>10 mol%                     | Ligand/<br>12 mol%                                           | Conversion of <b>1a</b><br>/ % <sup>b</sup> | Yield of <b>3a</b><br>/ % <sup>b</sup> | Yield of <b>4a</b><br>/ % <sup>b</sup> |
|-----------------|--------------------------------------|--------------------------------------------------------------|---------------------------------------------|----------------------------------------|----------------------------------------|
| 1               | CuI                                  | Xantphos                                                     | 100                                         | 90(73)                                 | 0                                      |
| 2               | CuCl                                 | Xantphos                                                     | 100                                         | 57                                     | 0                                      |
| 3               | CuOAc                                | Xantphos                                                     | 100                                         | 87                                     | 0                                      |
| 4               | CuCl <sub>2</sub> ·2H <sub>2</sub> O | Xantphos                                                     | 100                                         | 86                                     | 0                                      |
| 5               | CuI                                  | DPEphos                                                      | 57                                          | 32                                     | 0                                      |
| 6               | CuI                                  | <i>rac</i> -BINAP                                            | 82                                          | 40                                     | 0                                      |
| 7               | CuI                                  | DPPE                                                         | 100                                         | 70                                     | 10                                     |
| 8               | CuI                                  | DPPBZ                                                        | 100                                         | 60                                     | 9                                      |
| 9               | CuI                                  | -                                                            | 76                                          | 54                                     | 20                                     |
| 10 <sup>c</sup> | CuI                                  | P( <i>p</i> -OMeC <sub>6</sub> H <sub>4</sub> ) <sub>3</sub> | 100                                         | 23                                     | 29                                     |
| 11 <sup>c</sup> | CuI                                  | PCy <sub>3</sub>                                             | 100                                         | 32                                     | 35                                     |
| 12 <sup>c</sup> | CuI                                  | P(2-furyl) <sub>3</sub>                                      | 100                                         | 61                                     | 20                                     |
| 13 <sup>c</sup> | CuI                                  | PPh <sub>3</sub>                                             | 100                                         | 46                                     | 20                                     |
| 14 <sup>d</sup> | CuI                                  | Xantphos                                                     | 48                                          | 38                                     | 0                                      |
| 15 <sup>e</sup> | CuI                                  | Xantphos                                                     | 64                                          | 48                                     | 0                                      |
| 16 <sup>f</sup> | CuI                                  | Xantphos                                                     | 85                                          | 84                                     | 0                                      |
| 17 <sup>g</sup> | CuI                                  | Xantphos                                                     | 100                                         | 86                                     | 0                                      |
| 18              | -                                    | Xantphos                                                     | 0                                           | -                                      | -                                      |
| 19 <sup>h</sup> | CuI                                  | Xantphos                                                     | 0                                           | -                                      | -                                      |

<sup>a</sup> General reaction condition: a mixture of **1a** (0.1 mmol), B<sub>2</sub>Pin<sub>2</sub> (0.15 mmol, 1.5 equiv), Cu catalyst (10 mol%), Ligand (12 mol%), *t*-BuOK (30 mol%) and *i*-PrOH (0.2 mmol, 2.0 equiv) in PX (0.1 M, 1 mL) was reacted at 30°C for 48 h under Ar. <sup>b</sup> The conversions of **1a** and yields of **3a/4a** were determined by crude <sup>1</sup>H NMR spectrum with naphthalene as an internal standard, the yield of isolated **3a** is given in parentheses. <sup>c</sup> 20 mol% ligand was used in the reaction. <sup>d</sup> DCM was used in the reaction. <sup>e</sup> 1,4-Dioxane was used in the reaction. <sup>f</sup> Toluene was used in the reaction. <sup>g</sup> THF was used in the reaction. <sup>h</sup> *t*-BuOK was omitted in the reaction. DPPBZ = 1,2-bis(diphenylphosphino)benzene. DPPE = 1,2-bis(diphenylphosphino)ethane. DPEphos = bis(2-diphenylphosphinophenyl)ether. *rac*-BINAP = (±)-2,2'-bis(diphenylphosphino)-1,1'-binaphthalene, P(2-furyl)<sub>3</sub> = tri(2-furyl)phosphine.

## Experimental Procedures and Spectral Data

### 1. Synthesis of Allenyl-Bdan 1

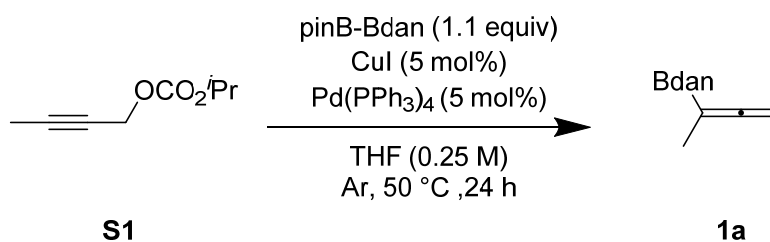

The allenyl-Bdan **1** were synthesized according to reported procedure by Szabó and co-workers.<sup>1</sup>

Representative procedure: An oven-dried Schlenk flask was equipped with a Teflon coated stirrer bar and charged with copper iodide (9.5 mg, 0.05 mmol), Pd(PPh<sub>3</sub>)<sub>4</sub> (57.8 mg, 0.05 mmol), pinB-Bdan (323.4 mg, 1.1 mmol) and THF (4 mL, 0.25 M). The resulted solution was stirred for 10 min at r.t., then propargylic carbonate **S1** (156.2 mg, 1.0 mmol) was added to the mixture via syringe. The final reaction mixture was heated at 50 °C for 24 hours, then the reaction mixture was diluted by petroleum ether (about 5 mL). The precipitate was filtered off by a short silica pad (Qingdao Haiyang Chem, neutral, 300-400 Mesh, about 2-3 cm in pipette) using EtOAc/petroleum ether (1:20 v/v) as an eluent. The solvent was removed and the residue was purified by a rapid silica gel chromatography (within 10 min) using a mixture of petroleum ether/EtOAc (1:100-1:20) as eluent affording pure product **1a**.

#### Analytical Data:

##### 2-(Buta-2,3-dien-2-yl)-2,3-dihydro-1*H*-naphtho[1,8-*de*][1,3,2]diazaborinine (**1a**)

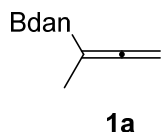

White solid (132.0 mg, 60%). NMR data: <sup>1</sup>H NMR (500 MHz, CDCl<sub>3</sub>) δ 7.11 (dd, *J* = 7.8, 7.8 Hz, 2H), 7.02 (d, *J* = 8.2 Hz, 2H), 6.34 (d, *J* = 7.2 Hz, 2H), 5.71 (brs, 2H), 4.69 (q, *J* = 3.0 Hz, 2H), 1.81 (t, *J* = 2.9 Hz, 3H); <sup>13</sup>C NMR (126 MHz, CDCl<sub>3</sub>) δ 212.4, 140.9, 136.2, 127.5, 119.4, 117.5, 105.6, 71.4, 14.2; Carbons with directly attached boron atoms were not observed, most likely due to quadrupolar relaxation. HRMS (ESI): *m/z* calcd. for [C<sub>14</sub>H<sub>14</sub>BN<sub>2</sub>]<sup>+</sup> 221.12407, found 221.12446.

##### 2-(Penta-1,2-dien-3-yl)-2,3-dihydro-1*H*-naphtho[1,8-*de*][1,3,2]diazaborinine (**1b**)

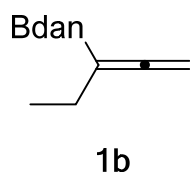

White solid (152.2 mg, 65%). NMR data: <sup>1</sup>H NMR (500 MHz, CDCl<sub>3</sub>) δ 7.10 (dd, *J* = 7.8, 7.8 Hz, 2H), 7.01 (d, *J* = 8.2 Hz, 2H), 6.34 (d, *J* = 7.2 Hz, 2H), 5.71 (brs, 2H), 4.78 (t, *J* = 3.3 Hz, 2H), 2.14–2.04 (m, 2H), 1.13 (t, *J* = 7.3 Hz, 3H); <sup>13</sup>C NMR (126 MHz, CDCl<sub>3</sub>) δ 211.7, 140.9, 136.2, 127.4, 119.4, 117.4, 105.6, 73.3, 20.7, 13.2; Carbons with directly attached boron atoms were not observed, most likely due to quadrupolar relaxation. HRMS (ESI): *m/z* calcd. for [C<sub>15</sub>H<sub>16</sub>BN<sub>2</sub>]<sup>+</sup> 235.13956, found 235.14011.

##### 2-(Octa-1,2-dien-3-yl)-2,3-dihydro-1*H*-naphtho[1,8-*de*][1,3,2]diazaborinine (**1c**)

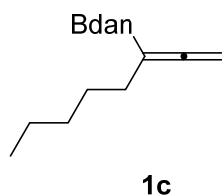

White solid (165.7 mg, 60%). NMR data:  $^1\text{H}$  NMR (500 MHz,  $\text{CDCl}_3$ )  $\delta$  7.10 (dd,  $J = 7.7, 7.7$  Hz, 2H), 7.01 (d,  $J = 8.2$  Hz, 2H), 6.34 (d,  $J = 7.3$  Hz, 2H), 5.71 (brs, 2H), 4.74 (t,  $J = 2.9$  Hz, 2H), 2.10–2.02 (m, 2H), 1.55–1.47 (m, 2H), 1.38–1.32 (m, 4H), 0.92 (t,  $J = 6.8$  Hz, 3H);  $^{13}\text{C}$  NMR (126 MHz,  $\text{CDCl}_3$ )  $\delta$  211.9, 140.9, 136.2, 127.4, 119.4, 117.4, 105.6, 72.6, 31.5, 28.5, 27.7, 22.5, 14.0; Carbons with directly attached boron atoms were not observed, most likely due to quadrupolar relaxation. HRMS (ESI):  $m/z$  calcd. for  $[\text{C}_{18}\text{H}_{22}\text{BN}_2]^+$  277.18655, found 277.18706.

**2-(1-Cyclohexylpropa-1,2-dien-1-yl)-2,3-dihydro-1H-naphtho[1,8-de][1,3,2]diazaborinine (1d)**

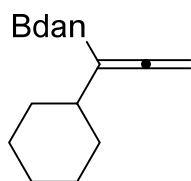

**1d**

White solid (149.9 mg, 52%). NMR data:  $^1\text{H}$  NMR (500 MHz,  $\text{CDCl}_3$ )  $\delta$  7.10 (dd,  $J = 7.9, 7.9$  Hz, 2H), 7.01 (d,  $J = 8.1$  Hz, 2H), 6.34 (d,  $J = 7.2$  Hz, 2H), 5.71 (brs, 2H), 4.76 (s, 2H), 1.94–1.86 (m, 1H), 1.86–1.75 (m, 4H), 1.75–1.66 (m, 1H), 1.41–1.29 (m, 2H), 1.28–1.14 (m, 3H);  $^{13}\text{C}$  NMR (126 MHz,  $\text{CDCl}_3$ )  $\delta$  211.2, 141.0, 136.2, 127.5, 119.5, 117.4, 105.6, 73.6, 36.4, 33.6, 26.6, 26.0; Carbons with directly attached boron atoms were not observed, most likely due to quadrupolar relaxation. HRMS (ESI):  $m/z$  calcd. for  $[\text{C}_{19}\text{H}_{22}\text{BN}_2]^+$  289.18643, found 289.18706.

**2-(Penta-2,3-dien-2-yl)-2,3-dihydro-1H-naphtho[1,8-de][1,3,2]diazaborinine (1e)**

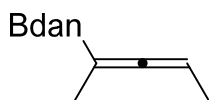

**1e**

White solid (149.8 mg, 64%). NMR data:  $^1\text{H}$  NMR (500 MHz,  $\text{CDCl}_3$ )  $\delta$  7.10 (dd,  $J = 7.8, 7.8$  Hz, 2H), 7.00 (d,  $J = 8.2$  Hz, 2H), 6.33 (d,  $J = 7.3$  Hz, 2H), 5.68 (brs, 2H), 5.13–5.05 (m, 1H), 1.78 (d,  $J = 1.5$  Hz, 3H), 1.72 (d,  $J = 6.9$  Hz, 3H);  $^{13}\text{C}$  NMR (126 MHz,  $\text{CDCl}_3$ )  $\delta$  209.7, 141.0, 136.2, 127.5, 119.4, 117.4, 105.6, 83.2, 14.9, 13.6; Carbons with directly attached boron atoms were not observed, most likely due to quadrupolar relaxation. HRMS (ESI):  $m/z$  calcd. for  $[\text{C}_{15}\text{H}_{16}\text{BN}_2]^+$  235.13966, found 235.14011.

**2-(Octa-2,3-dien-4-yl)-2,3-dihydro-1H-naphtho[1,8-de][1,3,2]diazaborinine (1f)**

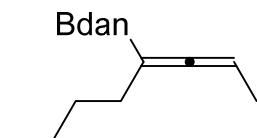

**1f**

White solid (182.3 mg, 66%). NMR data:  $^1\text{H}$  NMR (500 MHz,  $\text{CDCl}_3$ )  $\delta$  7.10 (dd,  $J = 7.8, 7.8$  Hz, 2H), 7.00 (d,  $J = 8.2$  Hz, 2H), 6.33 (d,  $J = 7.3$  Hz, 2H), 5.68 (brs, 2H), 5.20–5.10 (m, 1H), 2.11–2.01 (m, 2H), 1.73 (d,  $J = 7.0$  Hz, 3H), 1.52–1.44 (m, 2H), 1.44–1.34 (m, 2H), 0.94 (t,  $J = 7.2$  Hz, 3H);  $^{13}\text{C}$  NMR (126 MHz,  $\text{CDCl}_3$ )  $\delta$  209.3, 141.1, 136.3, 127.5, 119.4, 117.3, 105.5, 83.4, 31.2, 28.1, 22.3, 13.9, 13.6; Carbons with directly attached boron atoms were not observed, most likely due to quadrupolar relaxation. HRMS (ESI):  $m/z$  calcd. for  $[\text{C}_{18}\text{H}_{22}\text{BN}_2]^+$  277.18652, found 277.18706.

**2-(Deca-2,3-dien-4-yl)-2,3-dihydro-1H-naphtho[1,8-de][1,3,2]diazaborinine (1g)**

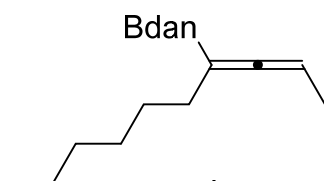

**1g**

White solid (152.1 mg, 50%). NMR data:  $^1\text{H}$  NMR (500 MHz,  $\text{CDCl}_3$ )  $\delta$  7.10 (dd,  $J = 7.9, 7.9$  Hz, 2H), 7.00 (d,  $J =$

8.2 Hz, 2H), 6.33 (d,  $J = 7.3$  Hz, 2H), 5.68 (brs, 2H), 5.18–5.10 (m, 1H), 2.05 (t,  $J = 6.1$  Hz, 2H), 1.73 (d,  $J = 7.0$  Hz, 3H), 1.52–1.45 (m, 2H), 1.41–1.20 (m, 6H), 0.90 (t,  $J = 6.1$  Hz, 3H);  $^{13}\text{C}$  NMR (126 MHz,  $\text{CDCl}_3$ )  $\delta$  209.3, 141.1, 136.3, 127.5, 119.4, 117.3, 105.5, 83.4, 31.7, 28.9(6), 28.9(5), 28.4, 22.6, 14.1, 13.6; Carbons with directly attached boron atoms were not observed, most likely due to quadrupolar relaxation. HRMS (ESI):  $m/z$  calcd. for  $[\text{C}_{20}\text{H}_{26}\text{BN}_2]^+$  305.21774, found 305.21836.

**2-(1-Phenylhexa-3,4-dien-3-yl)-2,3-dihydro-1H-naphtho[1,8-de][1,3,2]diazaborinine (1h)**

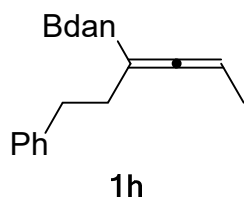

Colorless oil (194.5 mg, 60%). NMR data:  $^1\text{H}$  NMR (500 MHz,  $\text{CDCl}_3$ )  $\delta$  7.31 (dd,  $J = 7.5$  Hz, 2H), 7.26–7.18 (m, 3H), 7.09 (dd,  $J = 7.9, 7.9$  Hz, 2H), 6.99 (d,  $J = 8.2$  Hz, 2H), 6.28 (d,  $J = 7.3$  Hz, 2H), 5.60 (brs, 2H), 5.22–5.14 (m, 1H), 2.86–2.75 (m, 2H), 2.42–2.33 (m, 2H), 1.69 (d,  $J = 7.0$  Hz, 3H);  $^{13}\text{C}$  NMR (126 MHz,  $\text{CDCl}_3$ )  $\delta$  209.4, 142.0, 141.0, 136.2, 128.5, 128.3, 127.4, 125.9, 119.4, 117.4, 105.6, 84.2, 35.3, 30.5, 13.5; Carbons with directly attached boron atoms were not observed, most likely due to quadrupolar relaxation. HRMS (ESI):  $m/z$  calcd. for  $[\text{C}_{22}\text{H}_{21}\text{BN}_2]^+$  325.18597, found 325.18706.

**2-(1-Cyclohexylpenta-2,3-dien-2-yl)-2,3-dihydro-1H-naphtho[1,8-de][1,3,2]diazaborinine (1i)**

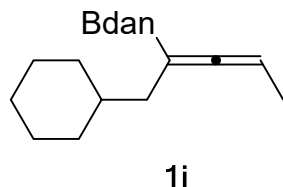

White solid (189.7 mg, 60%). NMR data:  $^1\text{H}$  NMR (500 MHz,  $\text{CDCl}_3$ )  $\delta$  7.10 (dd,  $J = 7.8, 7.8$  Hz, 2H), 7.00 (d,  $J = 8.2$  Hz, 2H), 6.33 (d,  $J = 7.3$  Hz, 2H), 5.67 (brs, 2H), 5.10 (q,  $J = 6.8$  Hz, 1H), 1.94 (d,  $J = 6.3$  Hz, 2H), 1.84–1.76 (m, 2H), 1.73 (d,  $J = 6.9$  Hz, 3H), 1.71–1.62 (m, 3H), 1.48–1.36 (m, 1H), 1.30–1.10 (m, 3H), 0.99–0.88 (m, 2H);  $^{13}\text{C}$  NMR (126 MHz,  $\text{CDCl}_3$ )  $\delta$  209.8, 141.1, 136.3, 127.5, 119.4, 117.3, 105.6, 82.6, 37.8, 36.7, 33.3, 26.5, 26.2, 13.5; Carbons with directly attached boron atoms were not observed, most likely due to quadrupolar relaxation. HRMS (ESI):  $m/z$  calcd. for  $[\text{C}_{21}\text{H}_{26}\text{BN}_2]^+$  317.21771, found 317.21836.

**2-(1-(Benzyloxy)hexa-3,4-dien-3-yl)-2,3-dihydro-1H-naphtho[1,8-de][1,3,2]diazaborinine (1j)**

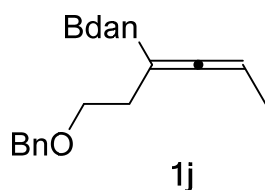

Colorless oil (233.8 mg, 66%). NMR data:  $^1\text{H}$  NMR (500 MHz,  $\text{CDCl}_3$ )  $\delta$  7.41–7.28 (m, 5H), 7.04 (dd,  $J = 7.8, 7.8$  Hz, 2H), 6.96 (d,  $J = 8.2$  Hz, 2H), 6.12 (d,  $J = 7.2$  Hz, 2H), 6.05 (brs, 2H), 5.13 (q,  $J = 6.6$  Hz, 1H), 4.55 (s, 2H), 3.72–3.62 (m, 2H), 2.40 (t,  $J = 6.8$  Hz, 2H), 1.72 (d,  $J = 6.8$  Hz, 3H);  $^{13}\text{C}$  NMR (126 MHz,  $\text{CDCl}_3$ )  $\delta$  209.9, 141.2, 137.9, 136.2, 128.4, 127.9, 127.6, 127.4, 119.5, 117.1, 105.5, 82.8, 73.3, 71.3, 30.5, 13.5; Carbons with directly attached boron atoms were not observed, most likely due to quadrupolar relaxation. HRMS (ESI):  $m/z$  calcd. for  $[\text{C}_{23}\text{H}_{23}\text{BN}_2\text{O}]^+$  355.19632, found 355.19762.

**3-(1H-Naphtho[1,8-de][1,3,2]diazaborinin-2(3H)-yl)hexa-3,4-dien-1-yl benzoate (1k)**

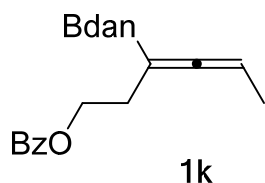

White solid (206.2 mg, 56%). NMR data:  $^1\text{H}$  NMR (500 MHz,  $\text{CDCl}_3$ )  $\delta$  8.07 (d,  $J = 7.8$  Hz, 2H), 7.55 (dd,  $J = 7.1,$

7.1 Hz, 1H), 7.41 (dd,  $J = 7.4, 7.4$  Hz, 2H), 7.10 (dd,  $J = 7.8, 7.8$  Hz, 2H), 7.01 (d,  $J = 8.2$  Hz, 2H), 6.36 (d,  $J = 7.2$  Hz, 2H), 5.98 (brs, 2H), 5.21 (q,  $J = 7.1$  Hz, 1H), 4.46 (t,  $J = 7.0$  Hz, 2H), 2.54 (t,  $J = 7.0$  Hz, 2H), 1.72 (d,  $J = 7.0$  Hz, 3H);  $^{13}\text{C}$  NMR (126 MHz,  $\text{CDCl}_3$ )  $\delta$  209.9, 166.8, 141.0, 136.2, 132.9, 130.0, 129.5, 128.2, 127.4, 119.5, 117.4, 105.7, 83.9, 64.6, 28.4, 13.4; Carbons with directly attached boron atoms were not observed, most likely due to quadrupolar relaxation. HRMS (ESI):  $m/z$  calcd. for  $[\text{C}_{23}\text{H}_{22}\text{BN}_2\text{O}_2]^+$  369.17581, found 369.17688.

**2-(1-Cyclohexylbuta-1,2-dien-1-yl)-2,3-dihydro-1*H*-naphtho[1,8-*de*][1,3,2]diazaborinine (1l)**

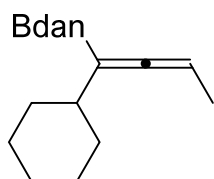

1l

White solid (211.6 mg, 70%). NMR data:  $^1\text{H}$  NMR (500 MHz,  $\text{CDCl}_3$ )  $\delta$  7.11 (dd,  $J = 7.9, 7.9$  Hz, 2H), 7.01 (d,  $J = 8.2$  Hz, 2H), 6.34 (d,  $J = 7.2$  Hz, 2H), 5.68 (brs, 2H), 5.18 (q,  $J = 6.6$  Hz, 1H), 1.95–1.86 (m, 1H), 1.86–1.76 (m, 4H), 1.74 (d,  $J = 6.9$  Hz, 3H), 1.71–1.65 (m, 1H), 1.43–1.29 (m, 2H), 1.26–1.10 (m, 3H);  $^{13}\text{C}$  NMR (126 MHz,  $\text{CDCl}_3$ )  $\delta$  208.7, 141.1, 136.3, 127.4, 119.4, 117.3, 105.5, 84.4, 37.1, 33.8, 33.7, 26.6(9), 26.6(8), 26.1, 13.8; Carbons with directly attached boron atoms were not observed, most likely due to quadrupolar relaxation. HRMS (ESI):  $m/z$  calcd. for  $[\text{C}_{20}\text{H}_{24}\text{BN}_2]^+$  303.20233, found 303.20271.

**2-(6-Phenylhexa-2,3-dien-2-yl)-2,3-dihydro-1*H*-naphtho[1,8-*de*][1,3,2]diazaborinine (1m)**

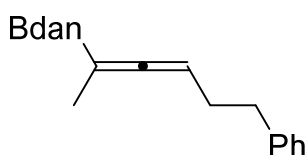

1m

Colorless oil (227.0 mg, 70%). NMR data:  $^1\text{H}$  NMR (500 MHz,  $\text{CDCl}_3$ )  $\delta$  7.30 (dd,  $J = 7.6, 7.6$  Hz, 2H), 7.23 (d,  $J = 7.5$  Hz, 2H), 7.19 (dd,  $J = 7.4, 7.4$  Hz, 2H), 7.09 (dd,  $J = 7.8, 7.8$  Hz, 2H), 7.00 (d,  $J = 8.2$  Hz, 2H), 6.28 (d,  $J = 7.3$  Hz, 2H), 5.56 (brs, 2H), 5.18–5.11 (m, 1H), 2.78 (t,  $J = 7.4$  Hz, 2H), 2.43 (dt,  $J = 14.1, 7.0$  Hz, 2H), 1.73 (d,  $J = 2.5$  Hz, 3H);  $^{13}\text{C}$  NMR (126 MHz,  $\text{CDCl}_3$ )  $\delta$  209.1, 141.4, 141.0, 136.2, 128.4, 128.3, 127.4, 125.9, 119.4, 117.4, 105.7, 87.0, 35.5, 29.4, 14.9; Carbons with directly attached boron atoms were not observed, most likely due to quadrupolar relaxation. HRMS (ESI):  $m/z$  calcd. for  $[\text{C}_{22}\text{H}_{22}\text{BN}_2]^+$  325.18622, found 325.18706.

**2-(6-Methylhepta-2,3-dien-2-yl)-2,3-dihydro-1*H*-naphtho[1,8-*de*][1,3,2]diazaborinine (1n)**

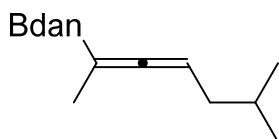

1n

Colorless oil (157.4 mg, 57%). NMR data:  $^1\text{H}$  NMR (500 MHz,  $\text{CDCl}_3$ )  $\delta$  7.10 (dd,  $J = 7.8, 7.8$  Hz, 2H), 7.00 (d,  $J = 8.2$  Hz, 2H), 6.31 (d,  $J = 7.3$  Hz, 2H), 5.69 (brs, 2H), 5.11–5.04 (m, 1H), 2.02–1.91 (m, 2H), 1.79 (d,  $J = 2.7$  Hz, 3H), 1.70 (septet,  $J = 6.6$  Hz, 1H), 0.98 (t,  $J = 6.1$  Hz, 6H);  $^{13}\text{C}$  NMR (126 MHz,  $\text{CDCl}_3$ )  $\delta$  209.5, 141.1, 136.3, 127.5, 119.4, 117.4, 105.5, 86.2, 37.6, 28.6, 22.2(4), 22.2(1), 14.8; Carbons with directly attached boron atoms were not observed, most likely due to quadrupolar relaxation. HRMS (ESI):  $m/z$  calcd. for  $[\text{C}_{18}\text{H}_{22}\text{BN}_2]^+$  277.18643, found 277.18706.

**2-(1-(*p*-Tolyl)buta-1,2-dien-1-yl)-2,3-dihydro-1*H*-naphtho[1,8-*de*][1,3,2]diazaborinine (1o)**



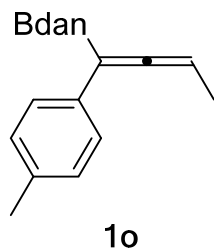

Colorless oil (124.1 mg, 40%). NMR data:  $^1\text{H}$  NMR (500 MHz,  $\text{CDCl}_3$ )  $\delta$  7.25 (d,  $J = 7.5$  Hz, 2H), 7.20 (d,  $J = 7.8$  Hz, 2H), 7.11 (dd,  $J = 7.6, 7.6$  Hz, 2H), 7.03 (d,  $J = 8.2$  Hz, 2H), 6.31 (d,  $J = 7.2$  Hz, 2H), 5.76 (brs, 2H), 5.42 (q,  $J = 7.1$  Hz, 1H), 2.38 (s, 3H), 1.83 (d,  $J = 7.1$  Hz, 3H);  $^{13}\text{C}$  NMR (126 MHz,  $\text{CDCl}_3$ )  $\delta$  210.5, 141.0, 136.4, 136.3, 133.9, 129.5, 128.0, 127.5, 119.6, 117.5, 105.7, 84.3, 21.0, 13.5; Carbons with directly attached boron atoms were not observed, most likely due to quadrupolar relaxation. HRMS (ESI):  $m/z$  calcd. for  $[\text{C}_{21}\text{H}_{20}\text{BN}_2]^+$  311.17141, found 311.17053.

**2-(4-(*p*-Tolyl)buta-2,3-dien-2-yl)-2,3-dihydro-1*H*-naphtho[1,8-*de*][1,3,2]diazaborinine (1p)**

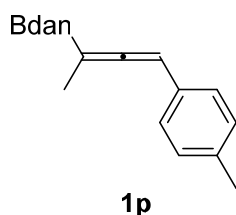

Purple oil (114.8 mg, 37%). NMR data:  $^1\text{H}$  NMR (500 MHz,  $\text{CDCl}_3$ )  $\delta$  7.24 (d,  $J = 8.0$  Hz, 2H), 7.17 (d,  $J = 7.9$  Hz, 2H), 7.12 (dd,  $J = 7.9, 7.9$  Hz, 2H), 7.05 (d,  $J = 8.2$  Hz, 2H), 6.34 (d,  $J = 7.2$  Hz, 2H), 6.21 (q,  $J = 2.8$  Hz, 1H), 5.77 (brs, 2H), 2.38 (s, 3H), 1.96 (d,  $J = 2.8$  Hz, 3H); HRMS (ESI):  $m/z$  calcd. for  $[\text{C}_{21}\text{H}_{20}\text{BN}_2]^+$  311.17141, found 311.17059. Due to the severe decomposition of **1p**, we could not get pure  $^{13}\text{C}$  NMR spectrum.

## 2. Synthesis of $\beta$ -Boryl Allyl-Bdan 3

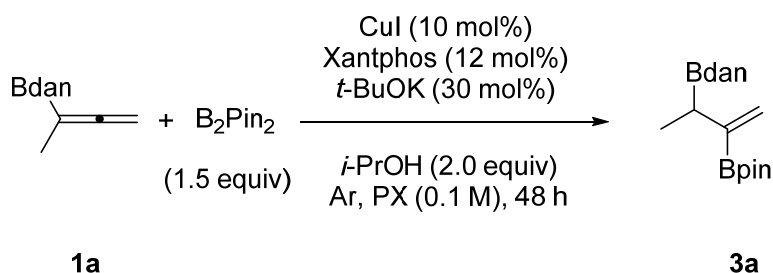

Representative procedure: An oven-dried Schlenk flask was equipped with a Teflon coated stirrer bar and charged with copper iodide (3.8 mg, 0.02 mmol), Xantphos (13.9 mg, 0.024 mmol), *t*-BuOK (6.8 mg, 0.06 mmol), B<sub>2</sub>Pin<sub>2</sub> (76.2 mg, 0.3 mmol), allenyl-Bdan **1a** (44.0 mg, 0.20 mmol) and Xylene (2 mL, 0.1 M). The resulted solution was stirred at r.t. for 15 min, then the *i*-PrOH (31.0  $\mu$ L, 0.40 mmol) was added to the mixture via syringe. The final reaction mixture was stirred at 30 °C for 48 h. Then the reaction mixture was diluted by petroleum ether (about 5 mL). The precipitate was filtered off by a short silica pad (Qingdao Haiyang Chem, neutral, 300-400 Mesh, about 2-3 cm in pipette) using EtOAc/petroleum ether (1:20 v/v) as an eluent. The solvent was removed and the residue was purified by a rapid silica gel chromatography (within 10 min) using a mixture of petroleum ether/EtOAc (1:100-1:20) as eluent affording pure product **3a**.

### Analytical data:

#### 2-(3-(4,4,5,5-Tetramethyl-1,3,2-dioxaborolan-2-yl)but-3-en-2-yl)-2,3-dihydro-1H-naphtho[1,8-de][1,3,2]diazaborinine (**3a**)

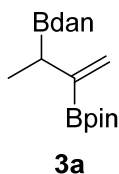

White solid (51 mg, 73%). NMR data: <sup>1</sup>H NMR (500 MHz, CDCl<sub>3</sub>)  $\delta$  7.07 (dd, *J* = 8.0, 8.0 Hz, 2H), 6.97 (d, *J* = 8.2 Hz, 2H), 6.27 (d, *J* = 7.2 Hz, 2H), 5.94 (brs, 2H), 5.82 (d, *J* = 2.5 Hz, 1H), 5.61 (brs, 1H), 2.15 (q, *J* = 7.0 Hz, 1H), 1.29 (s, 12H), 1.20 (d, *J* = 7.3 Hz, 3H); <sup>13</sup>C NMR (126 MHz, CDCl<sub>3</sub>)  $\delta$  141.4, 136.3, 127.5, 126.4, 119.5, 117.1, 105.3, 83.6, 24.9, 24.7, 14.6; Carbons with directly attached boron atoms were not observed, most likely due to quadrupolar relaxation. HRMS (ESI): *m/z* calcd. for [C<sub>20</sub>H<sub>27</sub>B<sub>2</sub>N<sub>2</sub>O<sub>2</sub>]<sup>+</sup> 349.22348, found 349.22532.

#### 2-(2-(4,4,5,5-Tetramethyl-1,3,2-dioxaborolan-2-yl)pent-1-en-3-yl)-2,3-dihydro-1H-naphtho[1,8-de][1,3,2]diazaborinine (**3b**)

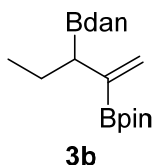

White solid (57 mg, 79%). NMR data: <sup>1</sup>H NMR (500 MHz, CDCl<sub>3</sub>)  $\delta$  7.07 (dd, *J* = 7.8, 7.8 Hz, 2H), 6.97 (d, *J* = 8.2 Hz, 2H), 6.26 (d, *J* = 7.2 Hz, 2H), 6.04 (brs, 2H), 5.80 (d, *J* = 2.9 Hz, 1H), 5.60 (d, *J* = 2.3 Hz, 1H), 1.87 (t, *J* = 7.8 Hz, 1H), 1.74–1.60 (m, 2H), 1.30 (s, 6H), 1.29 (s, 6H), 0.93 (t, *J* = 7.3 Hz, 3H); <sup>13</sup>C NMR (126 MHz, CDCl<sub>3</sub>)  $\delta$  141.5, 136.3, 127.8, 127.5, 119.6, 117.0, 105.3, 83.6, 24.9, 24.6, 23.0, 14.0; Carbons with directly attached boron atoms were not observed, most likely due to quadrupolar relaxation. HRMS (ESI): *m/z* calcd. for [C<sub>21</sub>H<sub>29</sub>B<sub>2</sub>N<sub>2</sub>O<sub>2</sub>]<sup>+</sup> 363.24069, found 363.24097.

#### 2-(2-(4,4,5,5-Tetramethyl-1,3,2-dioxaborolan-2-yl)oct-1-en-3-yl)-2,3-dihydro-1H-naphtho[1,8-de][1,3,2]diazaborinine (**3c**)

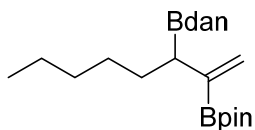

**3c**

White solid (44 mg, 54%). NMR data:  $^1\text{H}$  NMR (500 MHz,  $\text{CDCl}_3$ )  $\delta$  7.07 (dd,  $J = 7.9, 7.9$  Hz, 2H), 6.97 (d,  $J = 8.2$  Hz, 2H), 6.26 (d,  $J = 7.3$  Hz, 2H), 6.03 (brs, 2H), 5.79 (d,  $J = 2.3$  Hz, 1H), 5.59 (d,  $J = 1.8$  Hz, 1H), 1.95 (t,  $J = 7.8$  Hz, 1H), 1.70–1.45 (m, 4H), 1.35–1.21 (m, 16H), 0.87 (t,  $J = 6.1$  Hz, 3H);  $^{13}\text{C}$  NMR (126 MHz,  $\text{CDCl}_3$ )  $\delta$  141.5, 136.3, 127.7, 127.5, 119.6, 117.0, 105.3, 83.6, 32.0, 30.0, 29.0, 25.0, 24.6, 22.5, 14.1; Carbons with directly attached boron atoms were not observed, most likely due to quadrupolar relaxation. HRMS (ESI):  $m/z$  calcd. for  $[\text{C}_{24}\text{H}_{34}\text{B}_2\text{N}_2\text{O}_2\text{Na}]^+$  427.26886, found 427.26986.

**2-(1-Cyclohexyl-2-(4,4,5,5-tetramethyl-1,3,2-dioxaborolan-2-yl)allyl)-2,3-dihydro-1H-naphtho[1,8-de][1,3,2]diazaborinine (3d)**

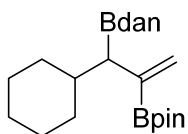

**3d**

White solid (35 mg, 42%). NMR data:  $^1\text{H}$  NMR (500 MHz,  $\text{CDCl}_3$ )  $\delta$  7.07 (dd,  $J = 7.8, 7.8$  Hz, 2H), 6.96 (d,  $J = 8.1$  Hz, 2H), 6.29 (brs, 2H), 6.26 (d,  $J = 8.2$  Hz, 2H), 5.71 (d,  $J = 2.6$  Hz, 1H), 5.55 (d,  $J = 2.2$  Hz, 1H), 1.89–1.76 (m, 2H), 1.75–1.59 (m, 5H), 1.56 (d,  $J = 6.5$  Hz, 1H), 1.36 (s, 6H), 1.30 (s, 6H), 1.20–1.08 (m, 2H), 0.94–0.81 (m, 2H);  $^{13}\text{C}$  NMR (126 MHz,  $\text{CDCl}_3$ )  $\delta$  141.7, 136.3, 129.0, 127.5, 119.6, 116.9, 105.2, 83.6, 37.9, 33.9, 33.5, 26.5(7), 26.5(6), 26.4, 25.1, 24.4; Carbons with directly attached boron atoms were not observed, most likely due to quadrupolar relaxation. HRMS (ESI):  $m/z$  calcd. for  $[\text{C}_{25}\text{H}_{35}\text{B}_2\text{N}_2\text{O}_2]^+$  417.28656, found 417.28792.

**(E)-2-(3-(4,4,5,5-Tetramethyl-1,3,2-dioxaborolan-2-yl)pent-3-en-2-yl)-2,3-dihydro-1H-naphtho[1,8-de][1,3,2]diazaborinine (3e)**

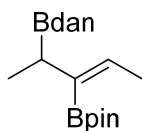

**3e**

White solid (46 mg, 63%). NMR data:  $^1\text{H}$  NMR (500 MHz,  $\text{CDCl}_3$ )  $\delta$  7.07 (dd,  $J = 7.8, 7.8$  Hz, 2H), 6.96 (d,  $J = 8.2$  Hz, 2H), 6.27 (d,  $J = 7.3$  Hz, 2H), 6.10 (q,  $J = 6.9$  Hz, 1H), 5.94 (brs, 2H), 2.00 (q,  $J = 7.2$  Hz, 1H), 1.92 (d,  $J = 6.9$  Hz, 3H), 1.29 (s, 6H), 1.28 (s, 6H), 1.16 (d,  $J = 7.4$  Hz, 3H);  $^{13}\text{C}$  NMR (126 MHz,  $\text{CDCl}_3$ )  $\delta$  141.6, 138.3, 136.3, 127.4, 119.5, 116.9, 105.3, 83.1, 24.9, 24.8, 17.4, 15.7; Carbons with directly attached boron atoms were not observed, most likely due to quadrupolar relaxation. HRMS (ESI):  $m/z$  calcd. for  $[\text{C}_{21}\text{H}_{28}\text{B}_2\text{N}_2\text{O}_2\text{Na}]^+$  385.22177, found 385.22291.

**(E)-2-(3-(4,4,5,5-Tetramethyl-1,3,2-dioxaborolan-2-yl)oct-2-en-4-yl)-2,3-dihydro-1H-naphtho[1,8-de][1,3,2]diazaborinine (3f)**

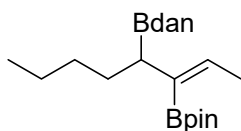

**3f**

White solid (62 mg, 76%). NMR data:  $^1\text{H}$  NMR (500 MHz,  $\text{CDCl}_3$ )  $\delta$  7.09 (dd,  $J = 7.7, 7.7$  Hz, 2H), 6.96 (d,  $J = 8.1$  Hz, 2H), 6.26 (d,  $J = 7.3$  Hz, 2H), 6.09 (brs, 2H), 6.07 (q,  $J = 7.0$  Hz, 1H), 1.89 (d,  $J = 6.9$  Hz, 3H), 1.80 (t,  $J = 7.8$  Hz, 1H), 1.65–1.51 (m, 6H), 1.36 (s, 12H), 0.92–0.81 (m, 3H);  $^{13}\text{C}$  NMR (126 MHz,  $\text{CDCl}_3$ )  $\delta$  141.7, 139.2, 136.3, 127.4, 119.6, 116.8, 105.2, 83.1, 31.7, 30.4, 25.0, 24.7, 22.8, 17.4, 14.0; Carbons with directly attached boron atoms were not observed, most likely due to quadrupolar relaxation. HRMS (ESI):  $m/z$  calcd. for

[C<sub>24</sub>H<sub>35</sub>B<sub>2</sub>N<sub>2</sub>O<sub>2</sub>]<sup>+</sup> 405.28671, found 405.28792.

**(E)-2-(3-(4,4,5,5-tetramethyl-1,3,2-dioxaborolan-2-yl)dec-2-en-4-yl)-2,3-dihydro-1H-naphtho[1,8-de][1,3,2]diazaborinine (3g)**

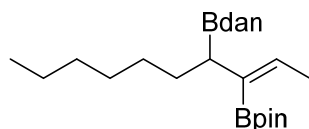

**3g**

White solid (52 mg, 60%). NMR data: <sup>1</sup>H NMR (500 MHz, CDCl<sub>3</sub>) δ 7.07 (dd, *J* = 7.9, 7.9 Hz, 2H), 6.96 (d, *J* = 8.2 Hz, 2H), 6.26 (d, *J* = 7.2 Hz, 2H), 6.09 (brs, 2H), 6.07 (q, *J* = 6.7 Hz, 1H), 1.89 (d, *J* = 6.8 Hz, 3H), 1.81 (t, *J* = 7.8 Hz, 1H), 1.31 (s, 12H), 1.29–1.18 (m, 10H), 0.87 (t, *J* = 6.0 Hz, 3H); <sup>13</sup>C NMR (126 MHz, CDCl<sub>3</sub>) δ 141.7, 139.2, 136.3, 127.5, 119.6, 116.8, 105.2, 83.1, 31.8, 30.7, 29.4(6), 29.4(2), 25.1, 24.7, 22.6, 17.4, 14.0; Carbons with directly attached boron atoms were not observed, most likely due to quadrupolar relaxation. HRMS (ESI): *m/z* calcd. for [C<sub>26</sub>H<sub>39</sub>B<sub>2</sub>N<sub>2</sub>O<sub>2</sub>]<sup>+</sup> 433.31766, found 433.31922.

**(E)-2-(1-Phenyl-4-(4,4,5,5-tetramethyl-1,3,2-dioxaborolan-2-yl)hex-4-en-3-yl)-2,3-dihydro-1H-naphtho[1,8-de][1,3,2]diazaborinine (3h)**

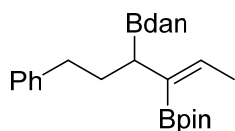

**3h**

Colorless oil (70 mg, 78%). NMR data: <sup>1</sup>H NMR (500 MHz, CDCl<sub>3</sub>) δ 7.30–7.26 (m, 2H), 7.21–7.14 (m, 3H), 7.07 (dd, *J* = 7.9, 7.9 Hz, 2H), 6.96 (d, *J* = 8.1 Hz, 2H), 6.25 (d, *J* = 7.2 Hz, 2H), 6.12 (q, *J* = 6.9 Hz, 1H), 6.05 (brs, 2H), 2.72–2.64 (m, 1H), 2.59–2.49 (m, 1H), 2.01–1.93 (m, 1H), 1.93 (d, *J* = 6.8 Hz, 3H), 1.90–1.82 (m, 2H), 1.31 (s, 12H); <sup>13</sup>C NMR (126 MHz, CDCl<sub>3</sub>) δ 142.8, 141.6, 140.1, 136.3, 128.4, 128.2, 127.4, 125.5, 119.6, 116.9, 105.3, 83.1, 35.4, 32.4, 25.0, 24.7, 17.4; Carbons with directly attached boron atoms were not observed, most likely due to quadrupolar relaxation. HRMS (ESI): *m/z* calcd. for [C<sub>28</sub>H<sub>34</sub>B<sub>2</sub>N<sub>2</sub>O<sub>2</sub>]<sup>+</sup> 453.28629, found 453.28792.

**(E)-2-(1-Cyclohexyl-3-(4,4,5,5-tetramethyl-1,3,2-dioxaborolan-2-yl)pent-3-en-2-yl)-2,3-dihydro-1H-naphtho[1,8-de][1,3,2]diazaborinine (3i)**

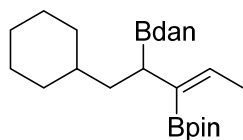

**3i**

White solid (48 mg, 54%). NMR data: <sup>1</sup>H NMR (500 MHz, CDCl<sub>3</sub>) δ 7.07 (dd, *J* = 7.8, 7.8 Hz, 2H), 6.96 (d, *J* = 8.1 Hz, 2H), 6.26 (d, *J* = 7.2 Hz, 2H), 6.09 (brs, 2H), 6.07 (q, *J* = 7.6 Hz, 1H), 1.98 (t, *J* = 7.8 Hz, 1H), 1.89 (d, *J* = 6.8 Hz, 3H), 1.79–1.71 (m, 1H), 1.71–1.58 (m, 5H), 1.58–1.47 (m, 2H), 1.31 (s, 12H), 1.30–1.08 (m, 3H), 0.95–0.84 (m, 1H), 0.83–0.73 (m, 1H); <sup>13</sup>C NMR (126 MHz, CDCl<sub>3</sub>) δ 141.7, 139.3, 136.3, 127.4, 119.5, 116.8, 105.2, 83.1, 38.3, 36.0, 34.2, 32.5, 26.7, 26.3, 26.1, 25.0, 24.7, 17.4; Carbons with directly attached boron atoms were not observed, most likely due to quadrupolar relaxation. HRMS (ESI): *m/z* calcd. for [C<sub>27</sub>H<sub>39</sub>B<sub>2</sub>N<sub>2</sub>O<sub>2</sub>]<sup>+</sup> 445.31873, found 445.31922.

**(E)-2-(1-(Benzyloxy)-4-(4,4,5,5-tetramethyl-1,3,2-dioxaborolan-2-yl)hex-4-en-3-yl)-2,3-dihydro-1H-naphtho[1,8-de][1,3,2]diazaborinine (3j)**

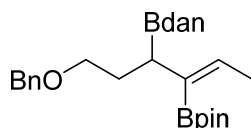

**3j**

Colorless oil (71 mg, 74%). NMR data: <sup>1</sup>H NMR (500 MHz, CDCl<sub>3</sub>) δ 7.36–7.27 (m, 5H), 7.06 (dd, *J* = 7.8, 7.8 Hz,

2H), 6.95 (d,  $J = 8.2$  Hz, 2H), 6.20 (d,  $J = 7.3$  Hz, 2H), 6.15–6.07 (m, 3H), 4.49 (s, 2H), 3.55–3.51 (m, 1H), 3.50–3.43 (m, 1H), 2.02–1.90 (m, 3H), 1.90 (d,  $J = 6.9$  Hz, 3H), 1.28 (s, 12H);  $^{13}\text{C}$  NMR (126 MHz,  $\text{CDCl}_3$ )  $\delta$  141.6, 140.2, 138.5, 136.3, 128.3, 127.6, 127.4, 119.6, 116.8, 105.3, 83.1, 72.9, 70.1, 30.8, 25.0, 24.7, 17.4; Carbons with directly attached boron atoms were not observed, most likely due to quadrupolar relaxation. HRMS (ESI):  $m/z$  calcd. for  $[\text{C}_{29}\text{H}_{36}\text{B}_2\text{N}_2\text{O}_3\text{Na}]^+$  505.27792, found 505.28043.

**(E)-3-(1*H*-Naphtho[1,8-*de*][1,3,2]diazaborinin-2(3*H*)-yl)-4-(4,4,5,5-tetramethyl-1,3,2-dioxaborolan-2-yl)hex-4-en-1-yl benzoate (3k)**

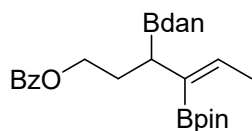

**3k**

White solid (69 mg, 70%). NMR data:  $^1\text{H}$  NMR (500 MHz,  $\text{CDCl}_3$ )  $\delta$  8.02 (d,  $J = 7.7$  Hz, 2H), 7.48 (dd,  $J = 7.4$ , 7.4 Hz, 1H), 7.30 (dd,  $J = 7.6$ , 7.6 Hz, 2H), 7.06 (dd,  $J = 7.8$ , 7.8 Hz, 2H), 6.96 (d,  $J = 8.2$  Hz, 2H), 6.26 (d,  $J = 7.8$  Hz, 2H), 6.18 (q,  $J = 6.8$  Hz, 1H), 6.11 (brs, 2H), 4.44–4.35 (m, 1H), 4.34–4.25 (m, 1H), 2.19–2.09 (m, 1H), 2.06–2.01 (m, 2H), 1.92 (d,  $J = 6.9$  Hz, 3H), 1.29 (s, 12H);  $^{13}\text{C}$  NMR (126 MHz,  $\text{CDCl}_3$ )  $\delta$  166.7, 141.4, 141.1, 136.2, 132.7, 130.2, 129.5, 128.1, 127.4, 119.6, 117.0, 105.4, 83.2, 64.9, 29.6, 25.0, 24.8, 17.4; Carbons with directly attached boron atoms were not observed, most likely due to quadrupolar relaxation. HRMS (ESI):  $m/z$  calcd. for  $[\text{C}_{29}\text{H}_{34}\text{B}_2\text{N}_2\text{O}_4]^+$  497.27563, found 497.27775.

**(E)-2-(1-Cyclohexyl-2-(4,4,5,5-tetramethyl-1,3,2-dioxaborolan-2-yl)but-2-en-1-yl)-2,3-dihydro-1*H*-naphtho[1,8-*de*][1,3,2]diazaborinine (3l)**

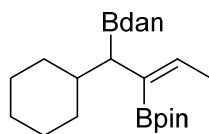

**3l**

White solid (69 mg, 80%). NMR data:  $^1\text{H}$  NMR (500 MHz,  $\text{CDCl}_3$ )  $\delta$  7.07 (dd,  $J = 7.9$ , 7.9 Hz, 2H), 6.95 (d,  $J = 8.1$  Hz, 2H), 6.36 (brs, 2H), 6.25 (d,  $J = 7.3$  Hz, 2H), 6.04 (q,  $J = 6.9$  Hz, 1H), 1.85 (d,  $J = 6.9$  Hz, 3H), 1.81–1.67 (m, 4H), 1.43 (d,  $J = 11.0$  Hz, 1H), 1.37 (s, 6H), 1.34 (s, 6H), 1.30–1.20 (m, 3H), 1.18–1.08 (m, 2H), 0.92–0.80 (m, 1H), 0.76–0.65 (m, 1H);  $^{13}\text{C}$  NMR (126 MHz,  $\text{CDCl}_3$ )  $\delta$  141.9, 139.9, 136.4, 127.4, 119.6, 116.7, 105.2, 83.2, 38.3, 34.1, 33.6, 26.6, 26.5, 26.4, 25.2, 24.5, 17.3; Carbons with directly attached boron atoms were not observed, most likely due to quadrupolar relaxation. HRMS (ESI):  $m/z$  calcd. for  $[\text{C}_{26}\text{H}_{37}\text{B}_2\text{N}_2\text{O}_2]^+$  431.30209, found 431.30357.

**(E)-2-(6-Phenyl-3-(4,4,5,5-tetramethyl-1,3,2-dioxaborolan-2-yl)hex-3-en-2-yl)-2,3-dihydro-1*H*-naphtho[1,8-*de*][1,3,2]diazaborinine (3m)**

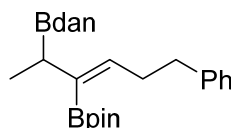

**3m**

White solid (73 mg, 81%). NMR data:  $^1\text{H}$  NMR (500 MHz,  $\text{CDCl}_3$ )  $\delta$  7.23 (dd,  $J = 7.5$ , 7.5 Hz, 2H), 7.19 (d,  $J = 7.3$  Hz, 2H), 7.15 (dd,  $J = 7.2$ , 7.2 Hz, 1H), 7.08 (dd,  $J = 7.7$ , 7.7 Hz, 2H), 6.97 (d,  $J = 8.2$  Hz, 2H), 6.25 (d,  $J = 7.2$  Hz, 2H), 6.05 (t,  $J = 6.5$  Hz, 1H), 5.86 (brs, 2H), 2.73–2.63 (m, 4H), 2.00 (q,  $J = 7.4$  Hz, 1H), 1.26 (s, 6H), 1.25 (s, 6H), 1.15 (d,  $J = 7.4$  Hz, 3H);  $^{13}\text{C}$  NMR (126 MHz,  $\text{CDCl}_3$ )  $\delta$  142.9, 142.1, 141.6, 136.3, 128.6, 128.1, 127.4, 125.6, 119.5, 116.9, 105.3, 83.1, 36.6, 33.0, 24.9, 24.7, 15.6; Carbons with directly attached boron atoms were not observed, most likely due to quadrupolar relaxation. HRMS (ESI):  $m/z$  calcd. for  $[\text{C}_{28}\text{H}_{35}\text{B}_2\text{N}_2\text{O}_2]^+$  453.28757, found 453.28792.

**(E)-2-(6-Methyl-3-(4,4,5,5-tetramethyl-1,3,2-dioxaborolan-2-yl)hept-3-en-2-yl)-2,3-dihydro-1*H*-naphtho[1,8-**

**de][1,3,2]diazaborinine (3n)**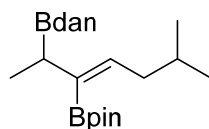**3n**

White solid (66 mg, 82%). NMR data:  $^1\text{H}$  NMR (500 MHz,  $\text{CDCl}_3$ )  $\delta$  7.08 (dd,  $J = 7.7, 7.7$  Hz, 2H), 6.97 (d,  $J = 8.1$  Hz, 2H), 6.26 (d,  $J = 7.1$  Hz, 2H), 6.02 (t,  $J = 7.3$  Hz, 1H), 5.92 (brs, 2H), 2.30–2.17 (m, 2H), 2.03 (q,  $J = 7.1$  Hz, 1H), 1.71–1.55 (m, 1H), 1.27 (s, 12H), 1.18 (d,  $J = 7.3$  Hz, 3H), 0.90 (t,  $J = 5.7$  Hz, 6H);  $^{13}\text{C}$  NMR (126 MHz,  $\text{CDCl}_3$ )  $\delta$  142.6, 141.6, 136.3, 127.5, 119.5, 116.9, 105.2, 83.1, 40.2, 29.1, 24.9, 24.7, 22.4, 22.3, 15.8; Carbons with directly attached boron atoms were not observed, most likely due to quadrupolar relaxation. HRMS (ESI):  $m/z$  calcd. for  $[\text{C}_{24}\text{H}_{35}\text{B}_2\text{N}_2\text{O}_2]^+$  405.28735, found 405.28792.

**(E)-2-(2-(4,4,5,5-Tetramethyl-1,3,2-dioxaborolan-2-yl)-1-(p-tolyl)but-2-en-1-yl)-2,3-dihydro-1H-naphtho[1,8-de][1,3,2]diazaborinine (3o)**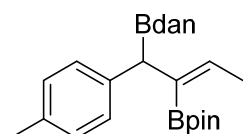**3o**

White solid (49.3 mg, 57%). NMR data:  $^1\text{H}$  NMR (500 MHz,  $\text{CDCl}_3$ )  $\delta$  7.15–7.10 (m, 2H), 7.10–7.05 (m, 4H), 6.99 (d,  $J = 8.2$  Hz, 2H), 6.25 (d,  $J = 7.2$  Hz, 2H), 6.04 (q,  $J = 6.8$  Hz, 1H), 5.92 (brs, 2H), 3.36 (s, 1H), 2.32 (s, 3H), 1.93 (d,  $J = 6.8$  Hz, 3H), 1.19 (s, 6H), 1.17 (s, 6H);  $^{13}\text{C}$  NMR (126 MHz,  $\text{CDCl}_3$ )  $\delta$  141.4, 140.4, 139.7, 136.3, 134.8, 129.4, 129.0, 127.4, 119.5, 117.1, 105.5, 83.2, 24.7, 24.6, 20.9, 17.5; Carbons with directly attached boron atoms were not observed, most likely due to quadrupolar relaxation. HRMS (ESI):  $m/z$  calcd. for  $[\text{C}_{27}\text{H}_{33}\text{B}_2\text{N}_2\text{O}_2]^+$  439.27227, found 439.27075.

**(E)-2-(3-(4,4,5,5-Tetramethyl-1,3,2-dioxaborolan-2-yl)-4-(p-tolyl)but-3-en-2-yl)-2,3-dihydro-1H-naphtho[1,8-de][1,3,2]diazaborinine (3p)**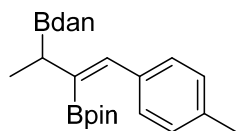**3p**

White solid (46.0 mg, 52%). NMR data:  $^1\text{H}$  NMR (500 MHz,  $\text{CDCl}_3$ )  $\delta$  7.23 (d,  $J = 7.7$  Hz, 2H), 7.11–7.05 (m, 4H), 6.98 (d,  $J = 8.1$  Hz, 2H), 6.87 (s, 1H), 6.29 (d,  $J = 7.2$  Hz, 2H), 6.03 (brs, 2H), 2.33 (s, 3H), 2.19 (q,  $J = 7.4$  Hz, 1H), 1.30 (d,  $J = 7.4$  Hz, 3H), 1.26 (brs, 12H);  $^{13}\text{C}$  NMR (126 MHz,  $\text{CDCl}_3$ )  $\delta$  141.4, 138.2, 136.6, 136.3, 136.1, 128.5, 127.9, 127.5, 119.6, 117.1, 105.5, 83.7, 24.8, 21.1, 16.0; Carbons with directly attached boron atoms were not observed, most likely due to quadrupolar relaxation. HRMS (ESI):  $m/z$  calcd. for  $[\text{C}_{27}\text{H}_{33}\text{B}_2\text{N}_2\text{O}_2]^+$  439.27227, found 439.27127.

### 3. Determination of the stereochemistry of 3e using a NOESY spectrum

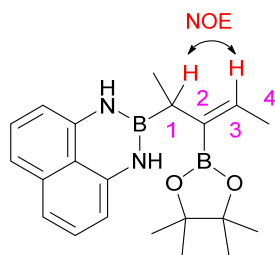

3e

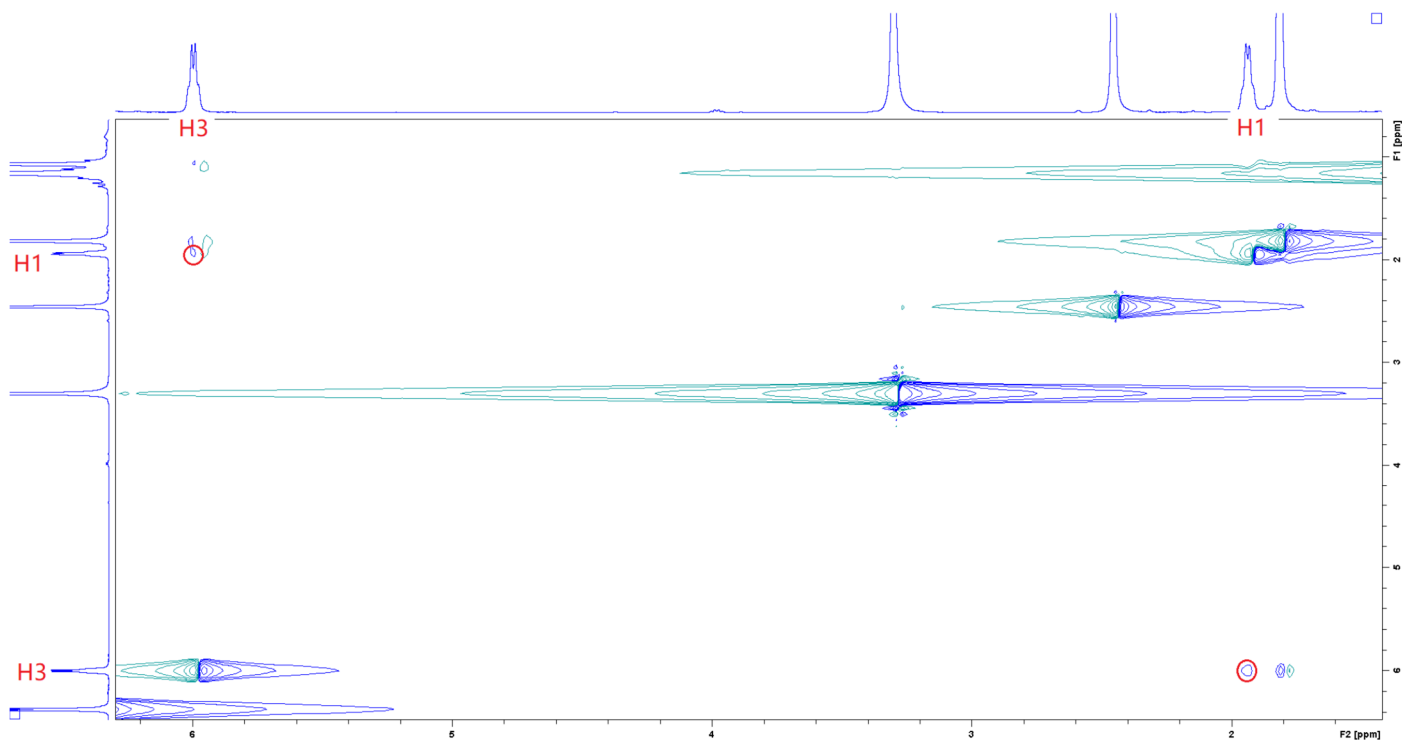

**Figure S1. Observed NOESY effect between the C1 proton and C3 proton**

The NOESY experiment (Figure S1) indicated a through space NOE effect between C(1)-H and C(3)-H. This indicates that C(1)-H and C(3)-H are close in space, and the C2-C3 double bond has an *E* geometry.

#### 4. Synthesis of reported compound 5

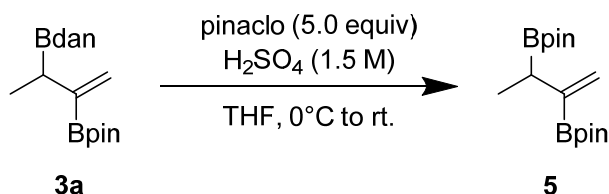

Compound **5** was synthesized according to the reported procedures by Santos and co-workers.<sup>2</sup> The product  $\beta$ -boryl allyl-Bdan **3a** (69.7 mg, 0.20 mmol) and pinacol (118.2 mg, 1.0 mmol) was dissolved in THF (2 mL), then cooled at  $0^\circ\text{C}$  for 10 min, sulfuric acid (aq.) (1.5 M, 0.80 mL, 1.20 mmol) was added sequentially. The contents were stirred at r.t. for 24 h. Water was added and the mixture was extracted with EtOAc. The organic layer was dried over magnesium sulfate, filtered, concentrated in vacuo and purified by flash chromatography (petroleum ether/EtOAc = 30:1) to yield the title compound (46.8 mg, 76%) as a colorless oil.

#### Analytical data:

##### 2,2'-(But-1-ene-2,3-diyl)bis(4,4,5,5-tetramethyl-1,3,2-dioxaborolane) (**5**)

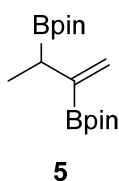

NMR data:  $^1\text{H}$  NMR (500 MHz,  $\text{CDCl}_3$ )  $\delta$  5.75 (d,  $J = 2.3$  Hz, 1H), 5.55 (brs, 1H), 2.03 (q,  $J = 7.1$  Hz, 1H), 1.25 (s, 12H), 1.22 (s, 12H), 1.12 (d,  $J = 7.3$  Hz, 3H);  $^{13}\text{C}$  NMR (126 MHz,  $\text{CDCl}_3$ )  $\delta$  125.6, 83.2, 83.0, 24.8, 24.6(7), 24.6(5), 24.6(4), 14.1; Carbons with directly attached boron atoms were not observed, most likely due to quadrupolar relaxation. HRMS (ESI):  $m/z$  calcd. for  $[\text{C}_{16}\text{H}_{30}\text{B}_2\text{O}_4\text{Na}]^+$  331.22202, found 331.22224.

#### 5. Procedure for Suzuki-Miyaura cross-coupling of Methyl 4-iodobenzoate **6** with **3f**

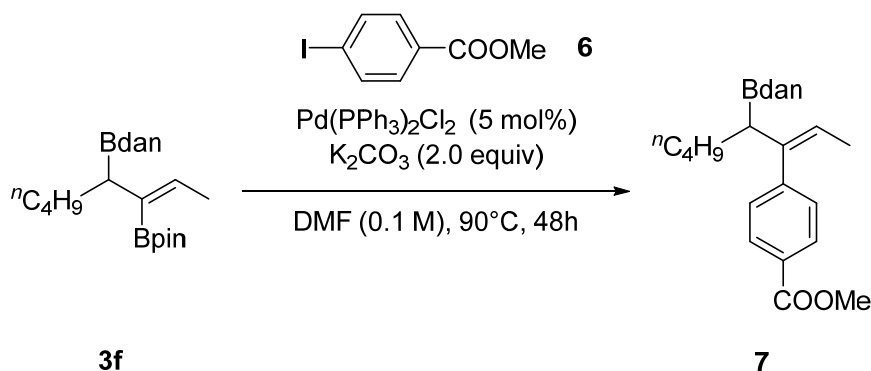

Methyl 4-iodobenzoate **6** (26.2 mg, 0.10 mmol), **3f** (60.6 mg, 0.15 mmol),  $\text{Pd}(\text{PPh}_3)_2\text{Cl}_2$  (3.5 mg, 0.005 mmol) and  $\text{K}_2\text{CO}_3$  (27.6 mg, 0.20 mmol) were added to a 10 mL schlenk flask fitted with a reflux condenser and purged 3 times with vacuum and Ar. DMF (1 ml) was added, then the reaction was heated to  $90^\circ\text{C}$  and stirred for 48 hours. The crude mixture was diluted with EtOAc and DMF was removed by washing with water. The organic layer was dried over magnesium sulfate, filtered, concentrated in vacuo and purified by flash chromatography (petroleum ether/EtOAc = 30:1) to yield the compound **7** (30.1 mg, 73%) as a white solid.

#### Analytical data:

##### Methyl (Z)-4-(4-(1*H*-naphtho[1,8-*de*][1,3,2]diazaborinin-2(3*H*)-yl)oct-2-en-3-yl)benzoate (**7**)



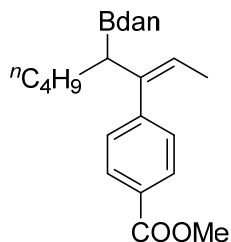

7

NMR data:  $^1\text{H}$  NMR (500 MHz,  $\text{CDCl}_3$ )  $\delta$  7.96 (d,  $J = 8.0$  Hz, 2H), 7.20 (d,  $J = 8.0$  Hz, 2H), 7.10 (dd,  $J = 7.8, 7.8$  Hz, 2H), 7.02 (d,  $J = 8.0$  Hz, 2H), 6.28 (d,  $J = 7.2$  Hz, 2H), 5.62 (q,  $J = 6.8$  Hz, 1H), 5.58 (brs, 2H), 3.90 (s, 3H), 2.02 (t,  $J = 7.7$  Hz, 1H), 1.59 (d,  $J = 6.8$  Hz, 3H), 1.53-1.46 (m, 2H), 1.36-1.22 (m, 4H), 0.88 (t,  $J = 6.8$  Hz, 3H);  $^{13}\text{C}$  NMR (126 MHz,  $\text{CDCl}_3$ )  $\delta$  167.0, 146.6, 143.1, 140.9, 136.2, 129.4, 128.6, 127.5, 121.0, 119.5, 127.5, 105.7, 52.0, 31.3, 29.2, 22.7, 14.8, 14.0; Carbons with directly attached boron atoms were not observed, most likely due to quadrupolar relaxation. HRMS (ESI):  $m/z$  calcd. for  $[\text{C}_{26}\text{H}_{30}\text{BN}_2\text{O}_2]^+$  413.23949, found 413.23849.

## 6. References:

1. T. S. N. Zhao, Y. Yang, T. Lessing and K. J. Szabó, *J. Am. Chem. Soc.*, **2014**, *136*, 7563.
2. X. Guo, A. K. Nelson, C. Slebodnick and W. L. Santos, *ACS Catal.*, **2015**, *5*, 2172.

## 7. NMR Spectra of 1, 3, 5 and 7

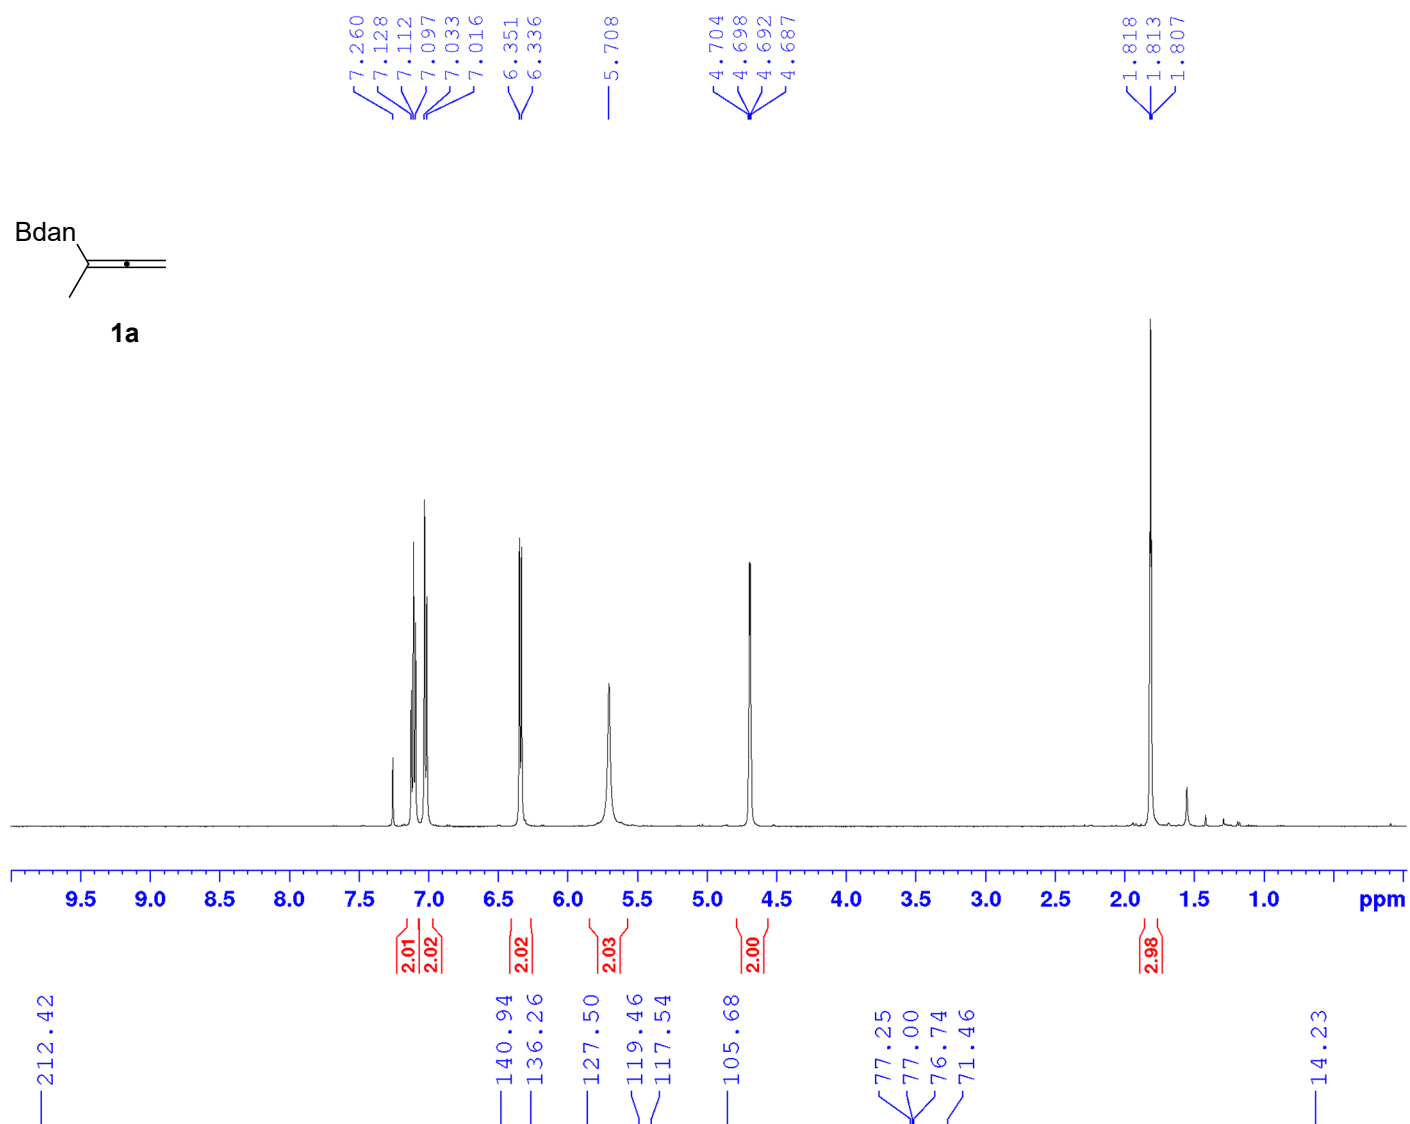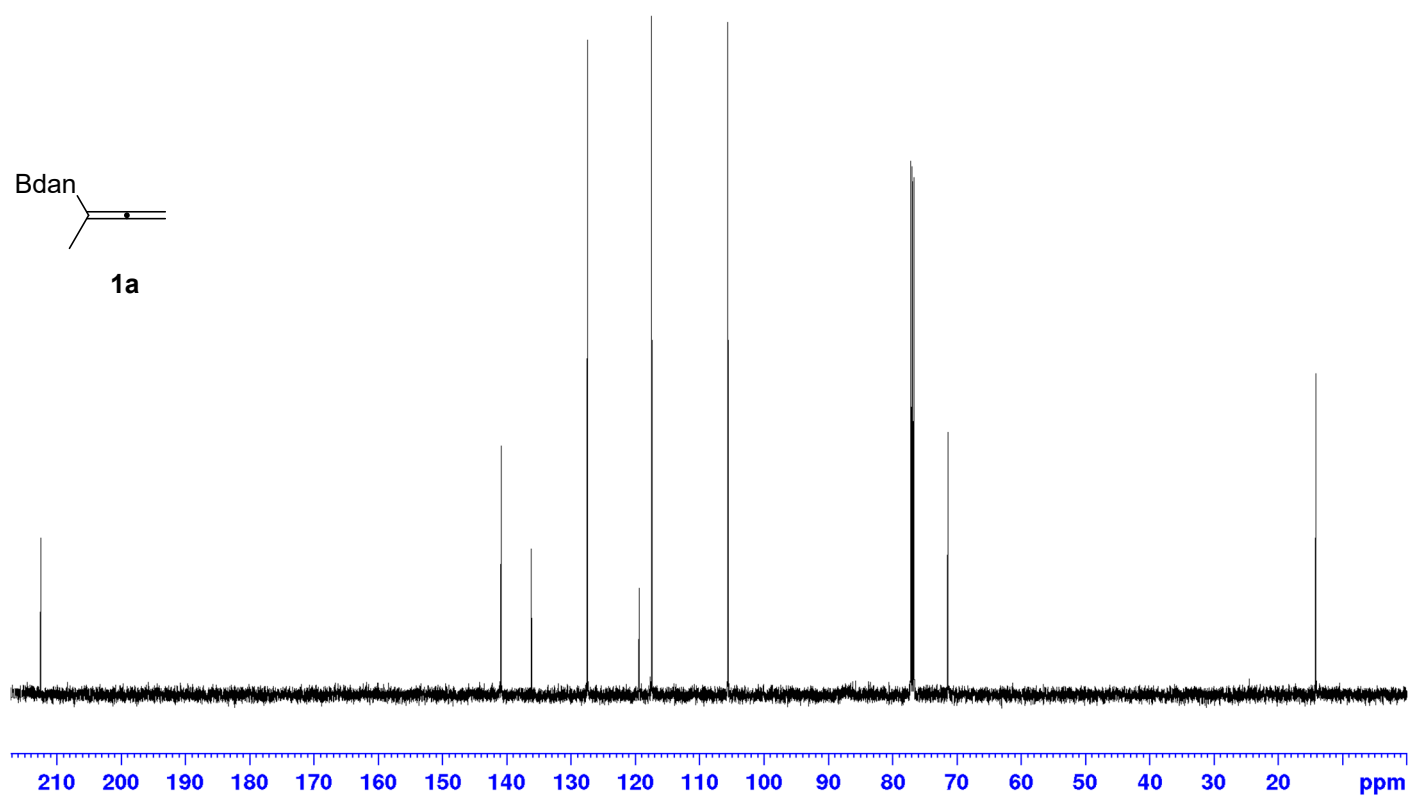

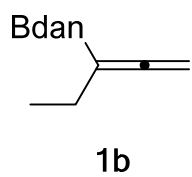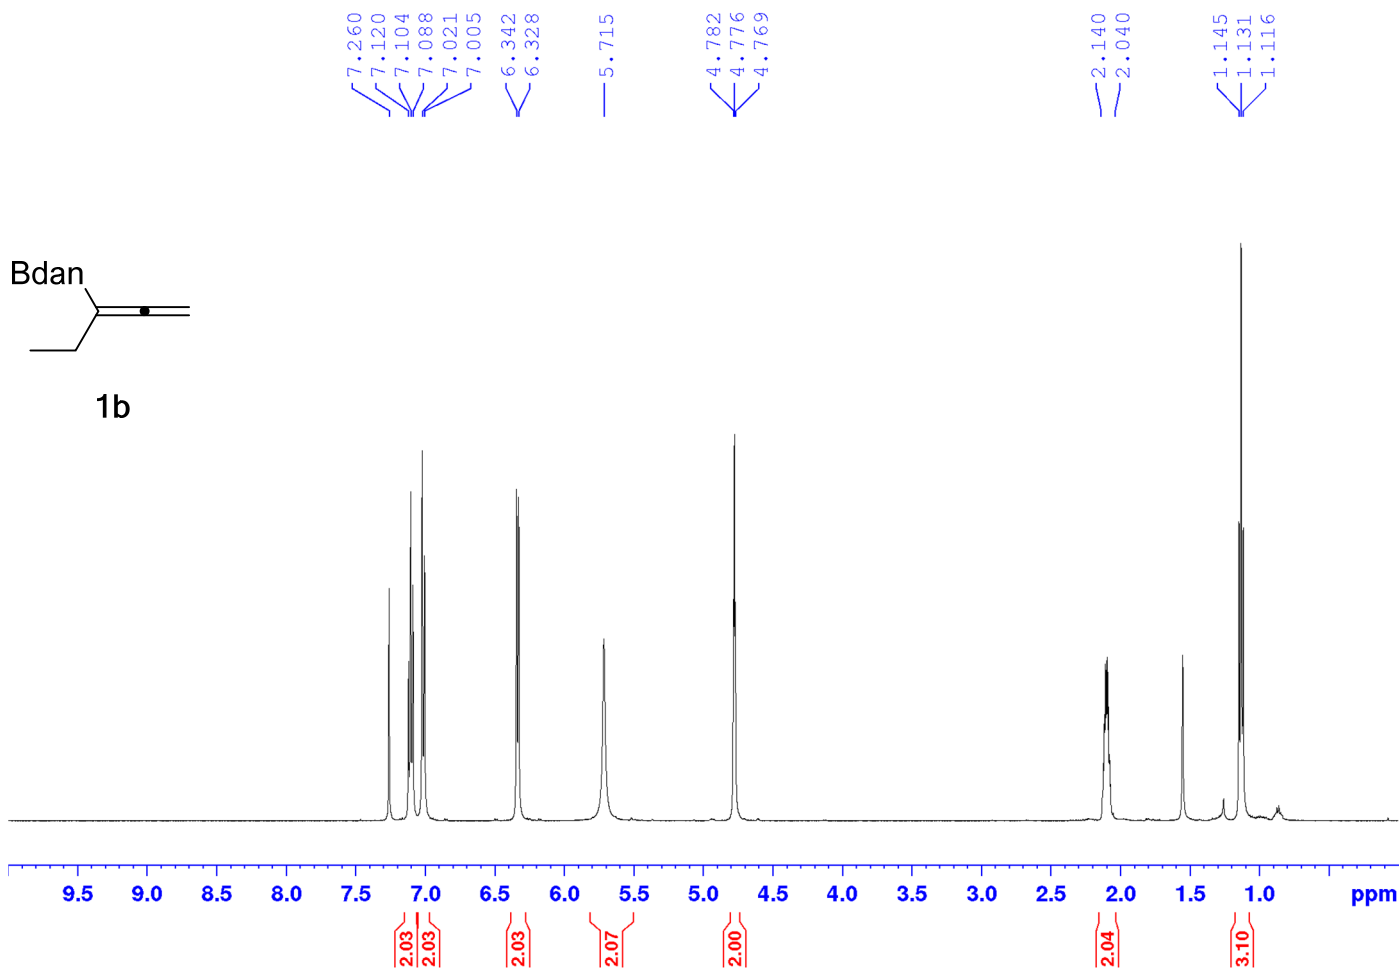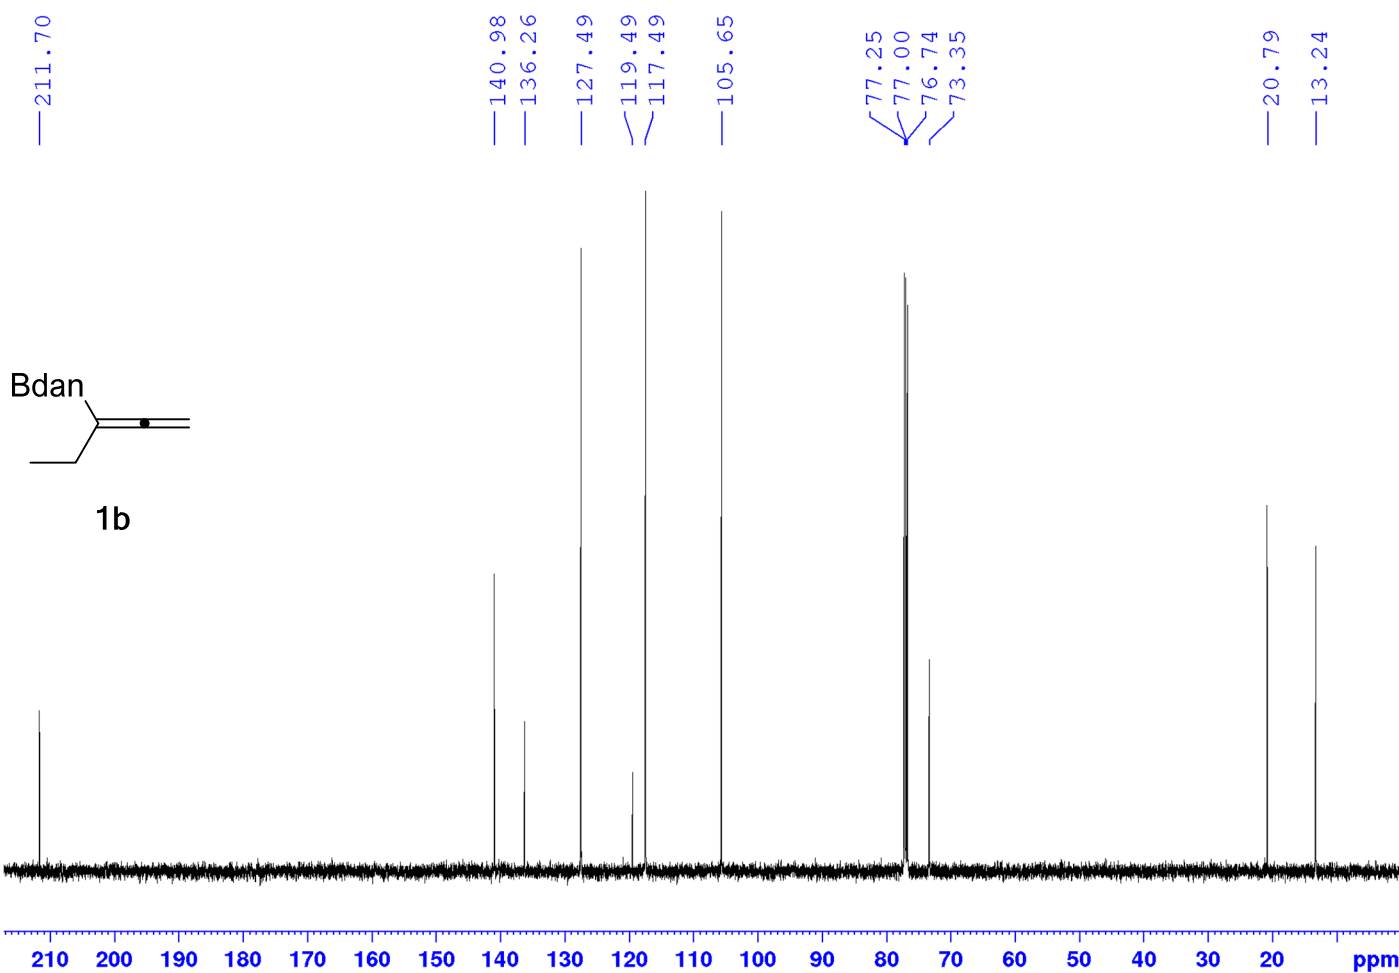

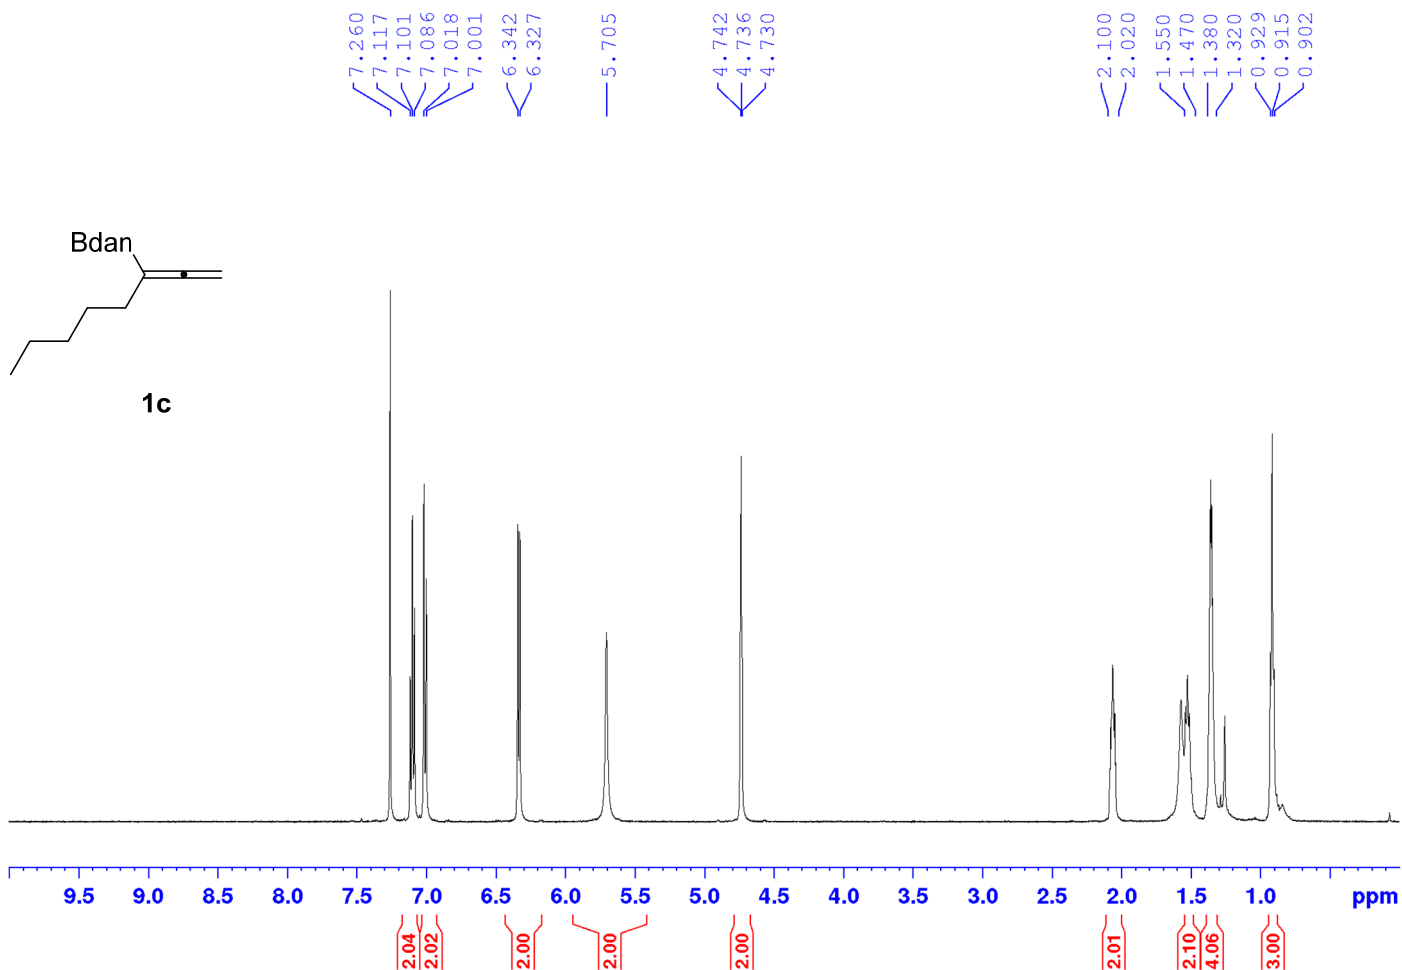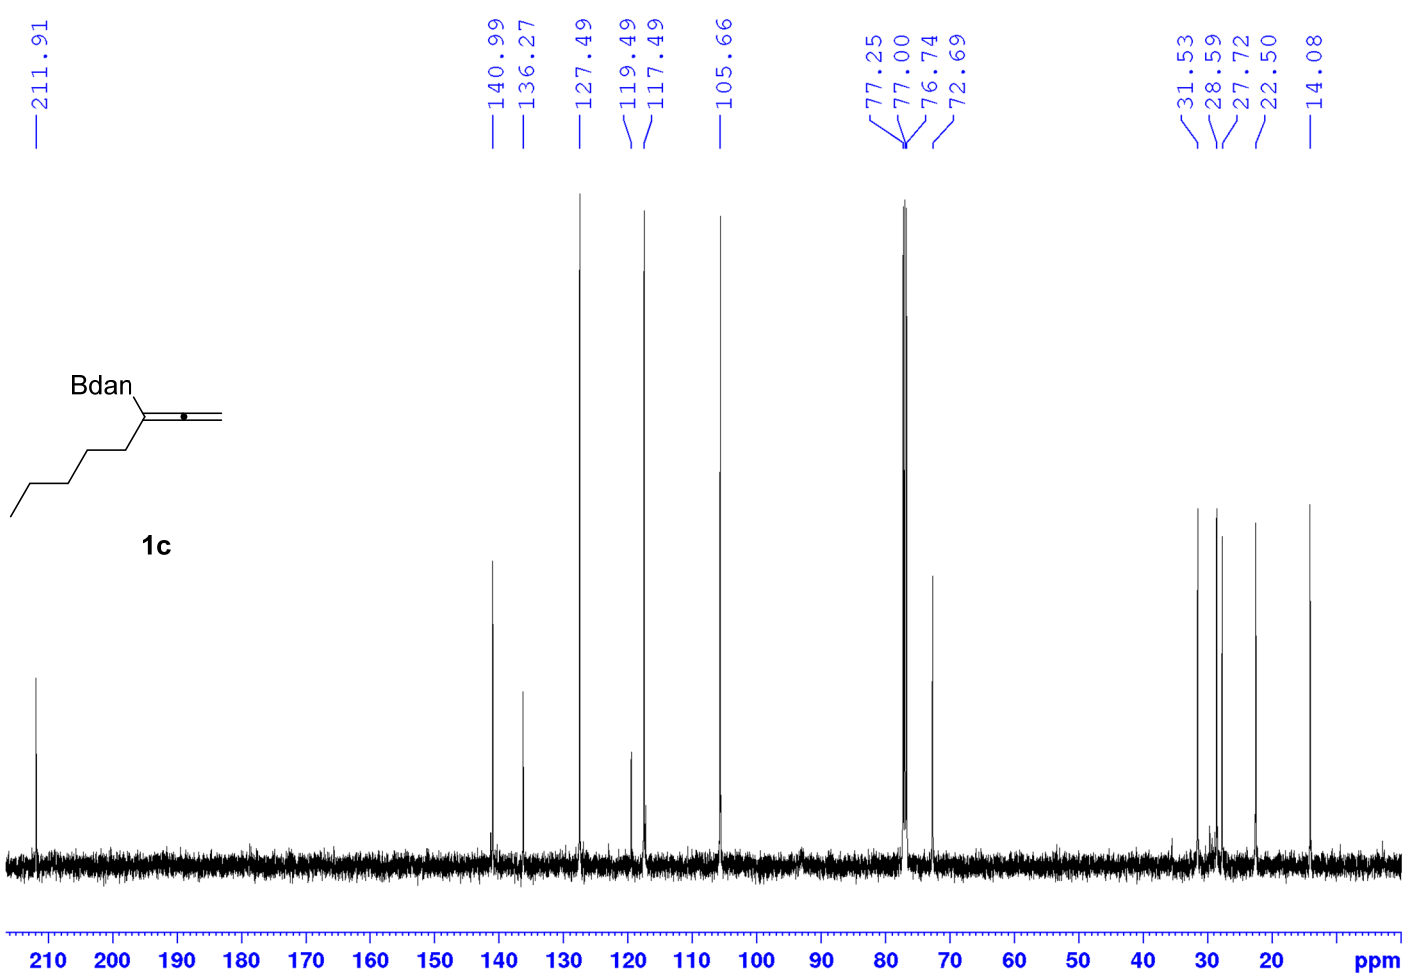

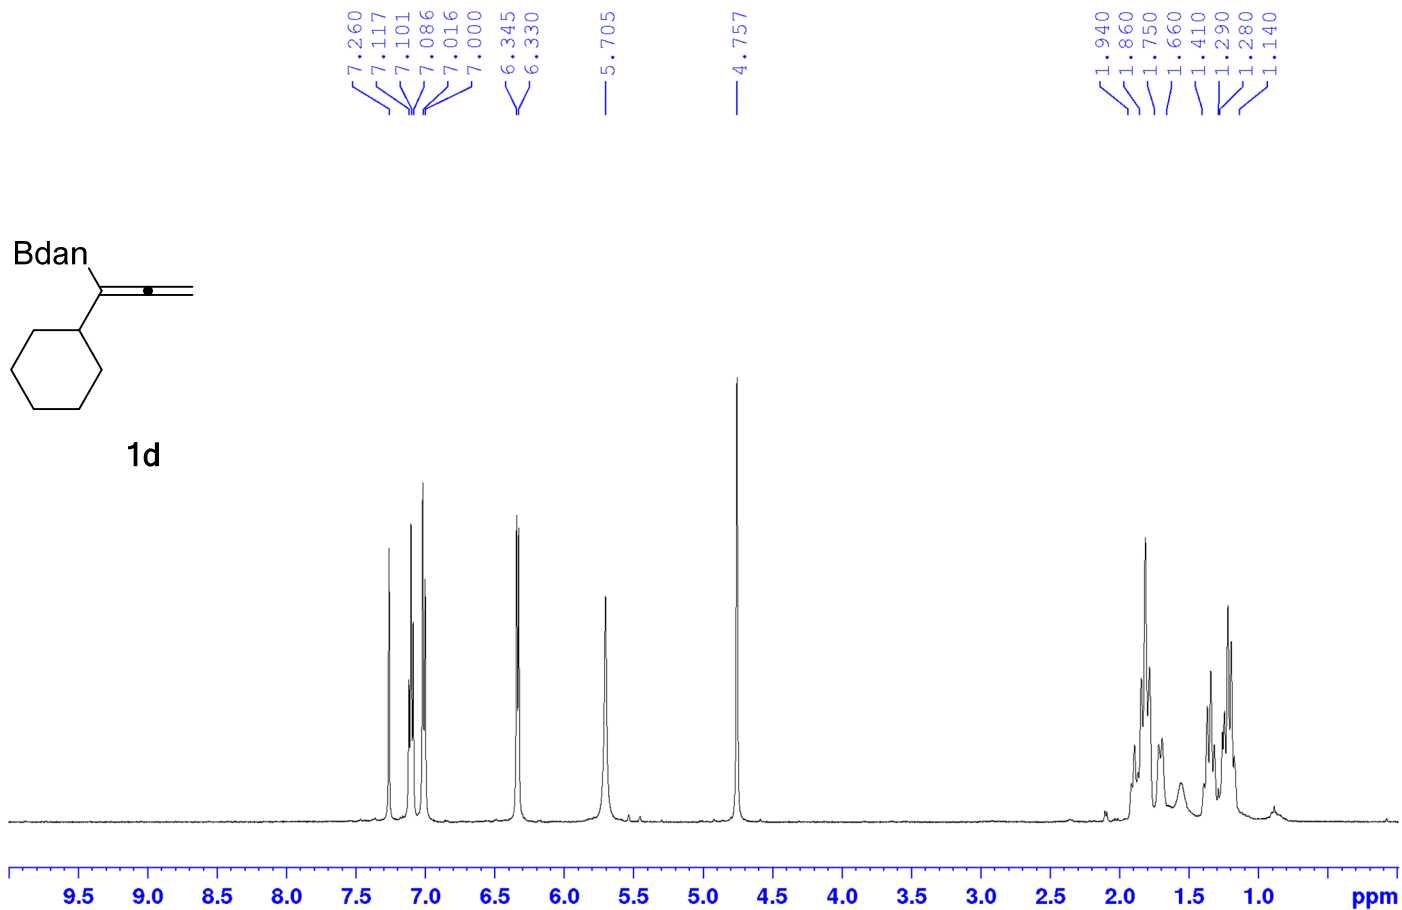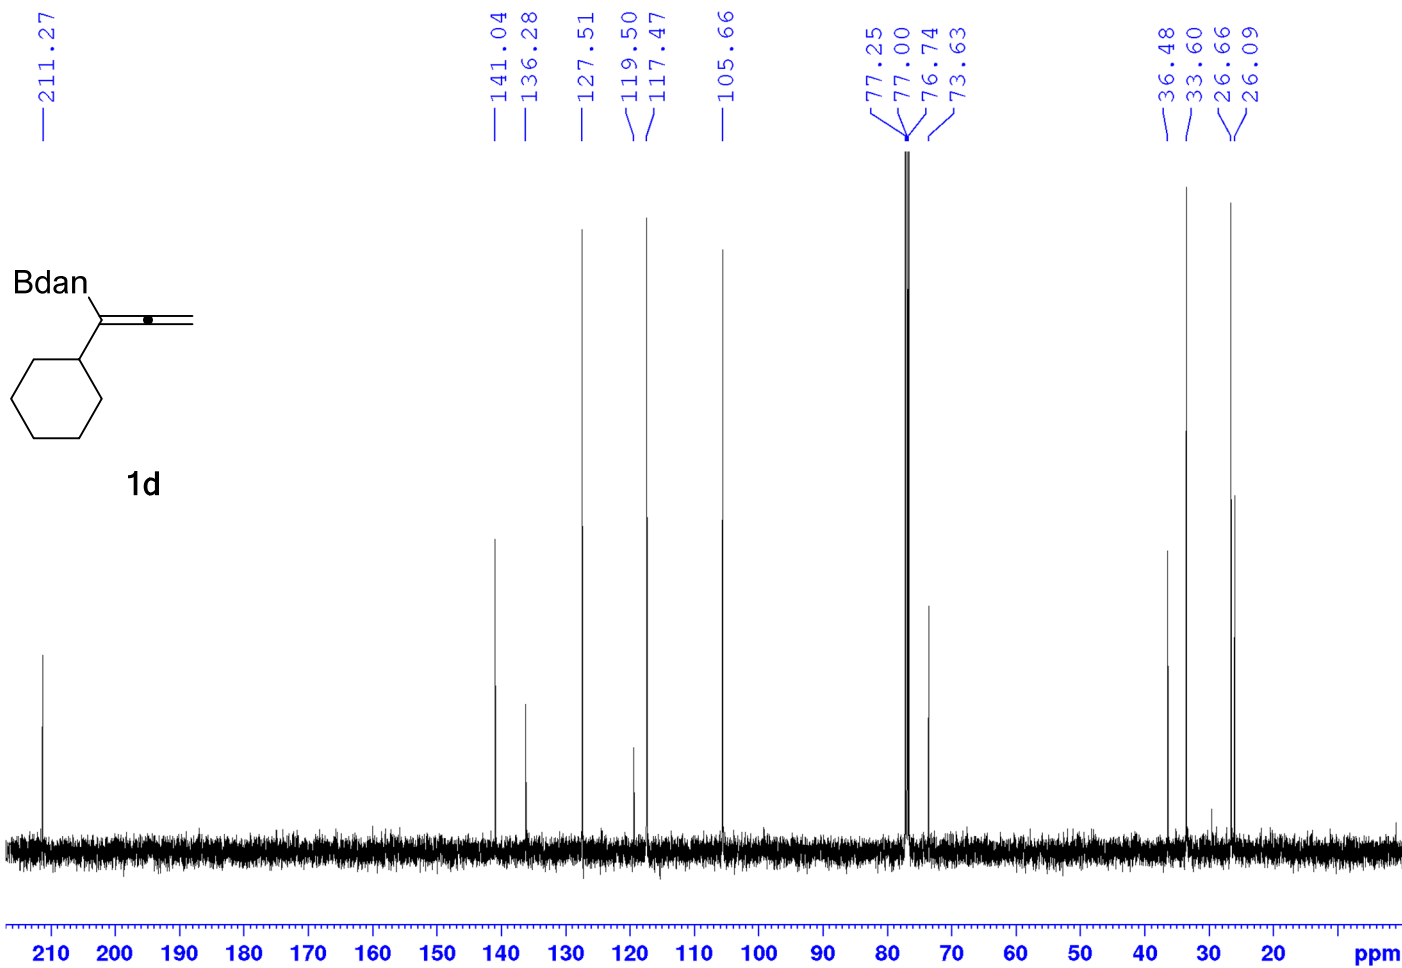

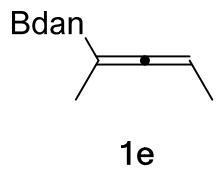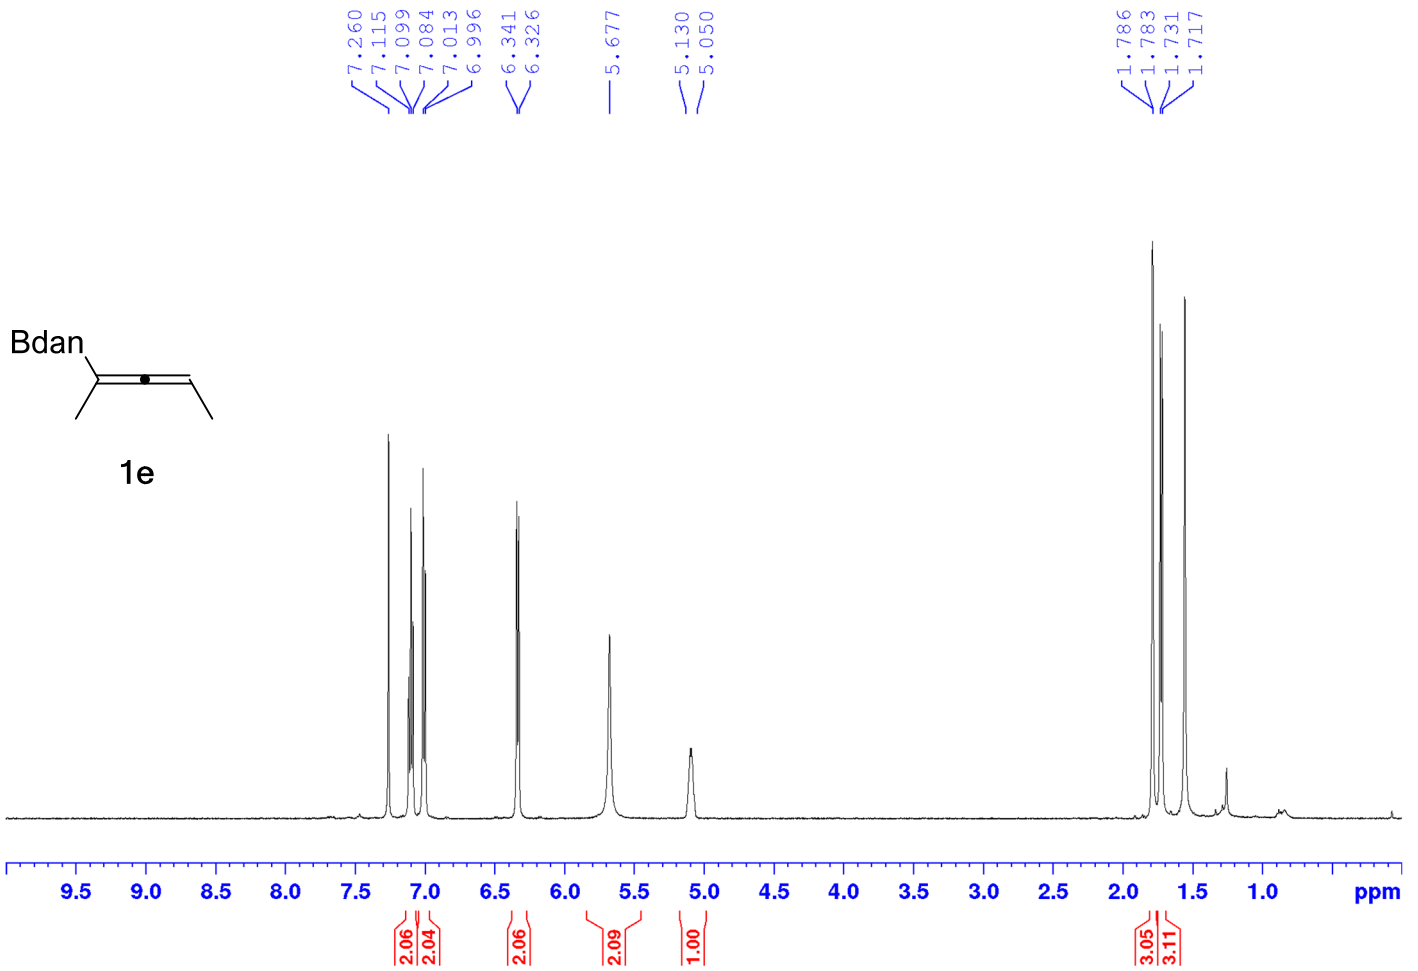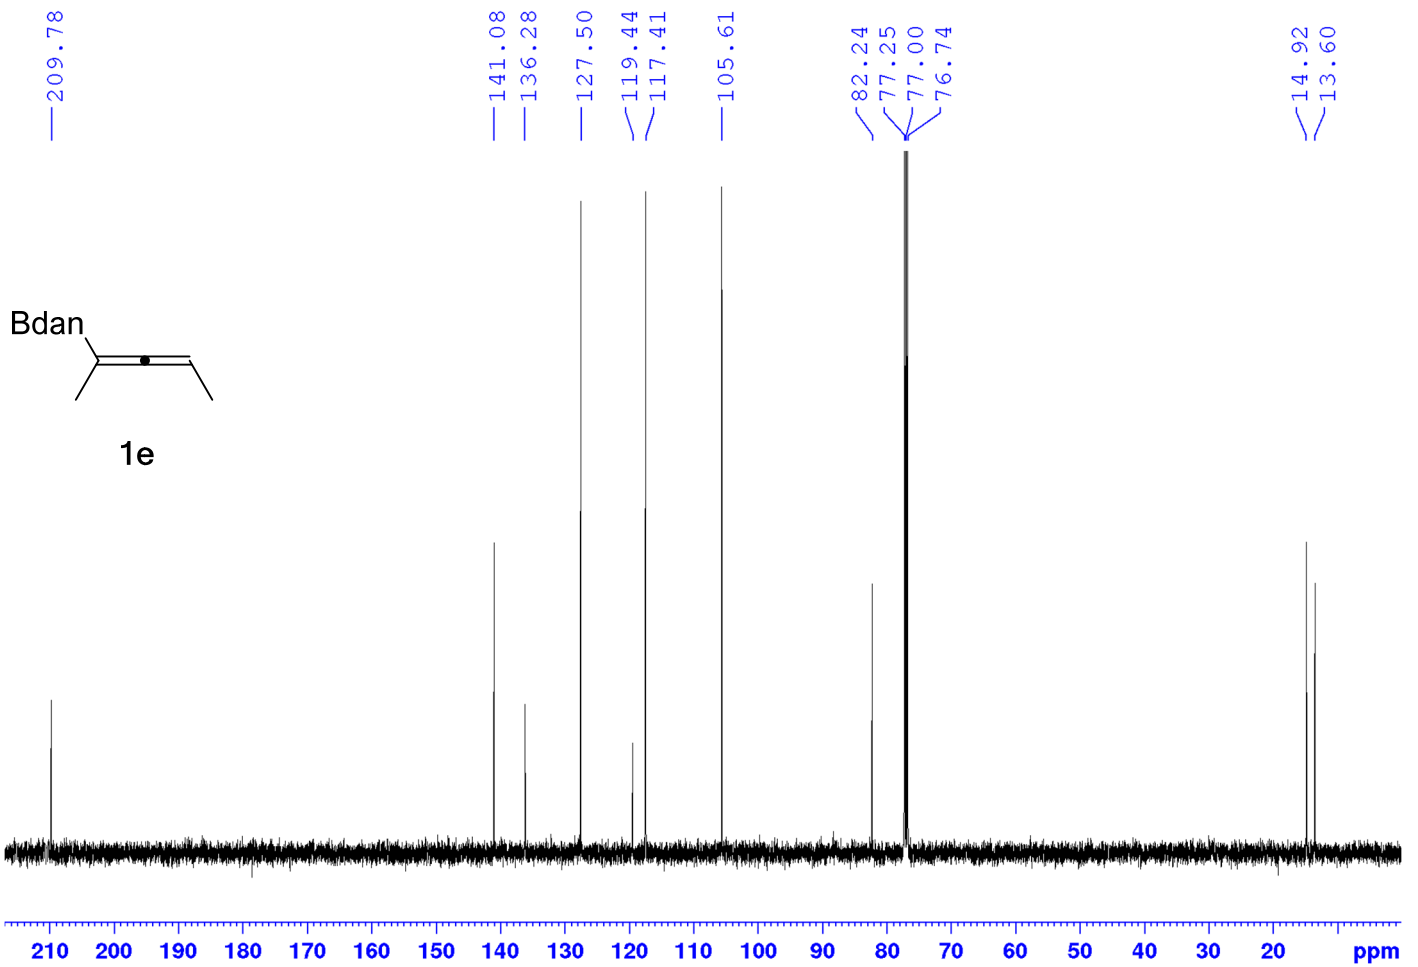

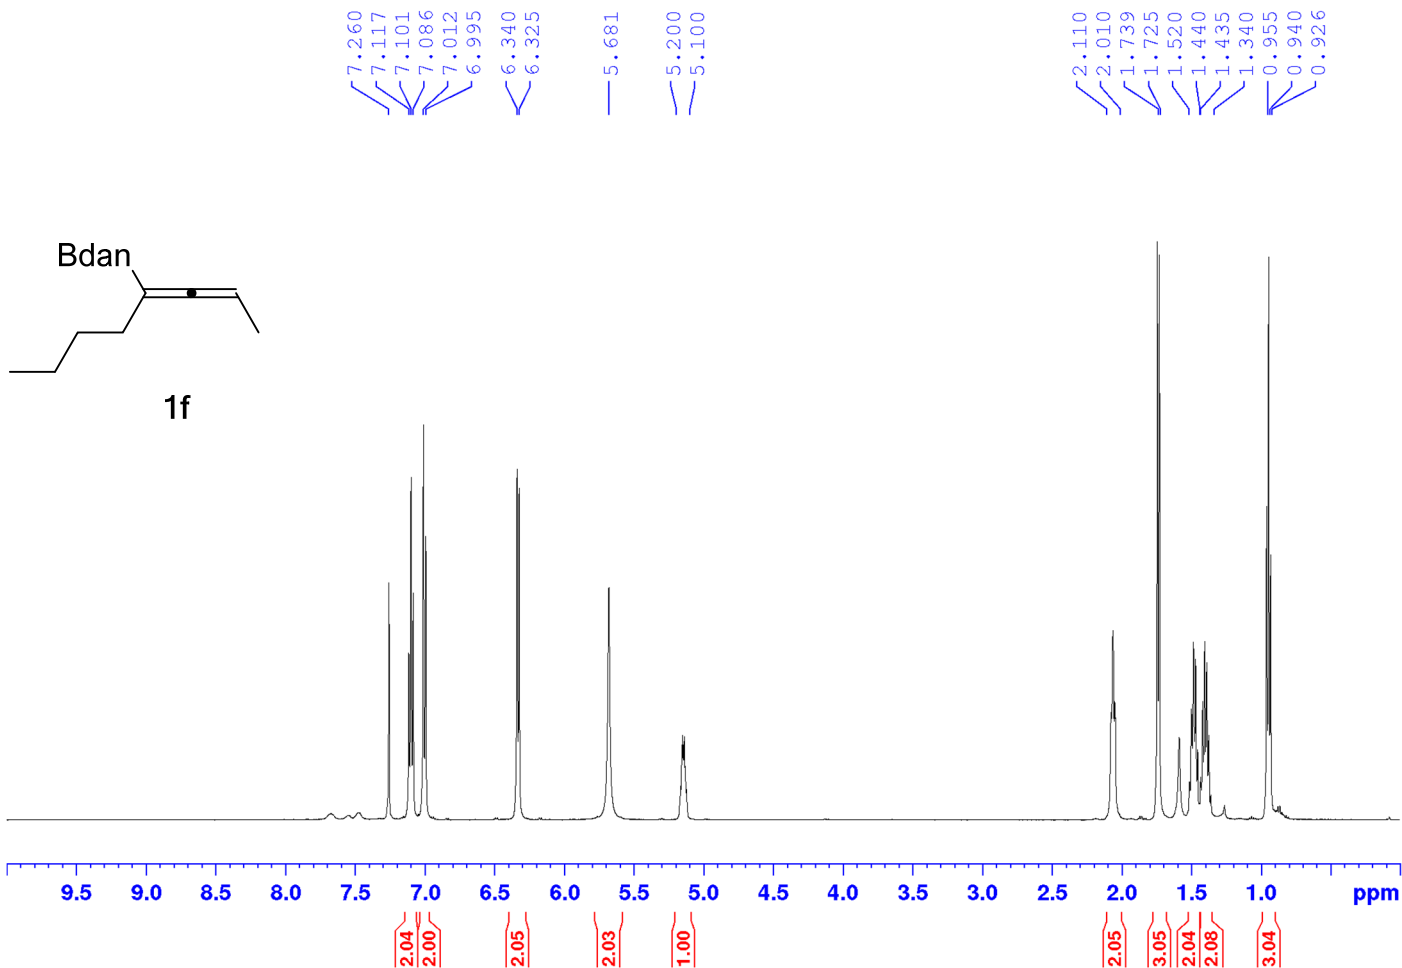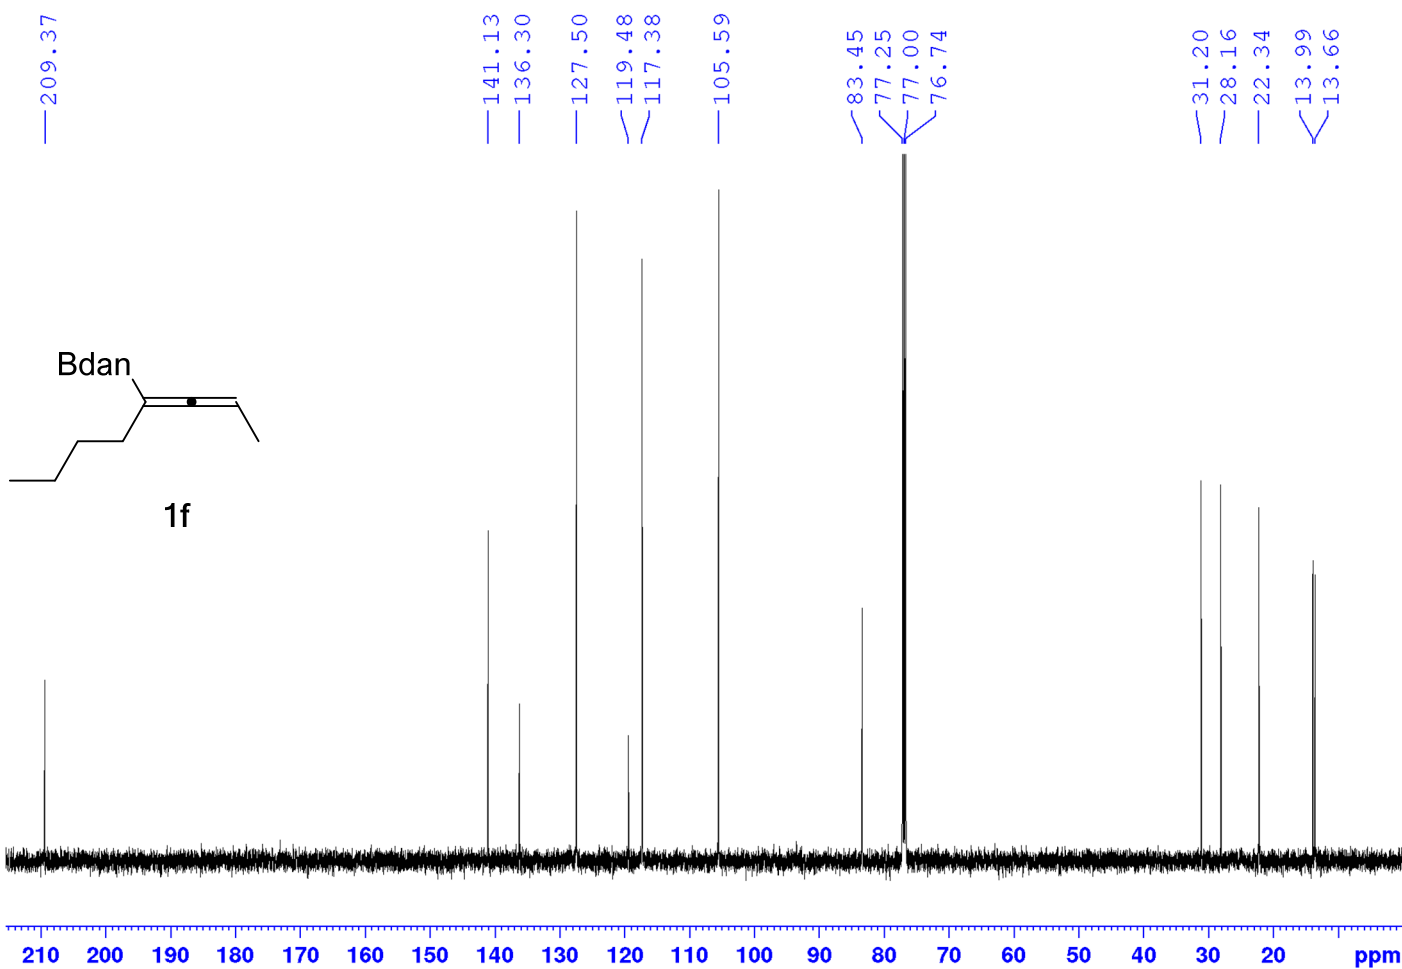

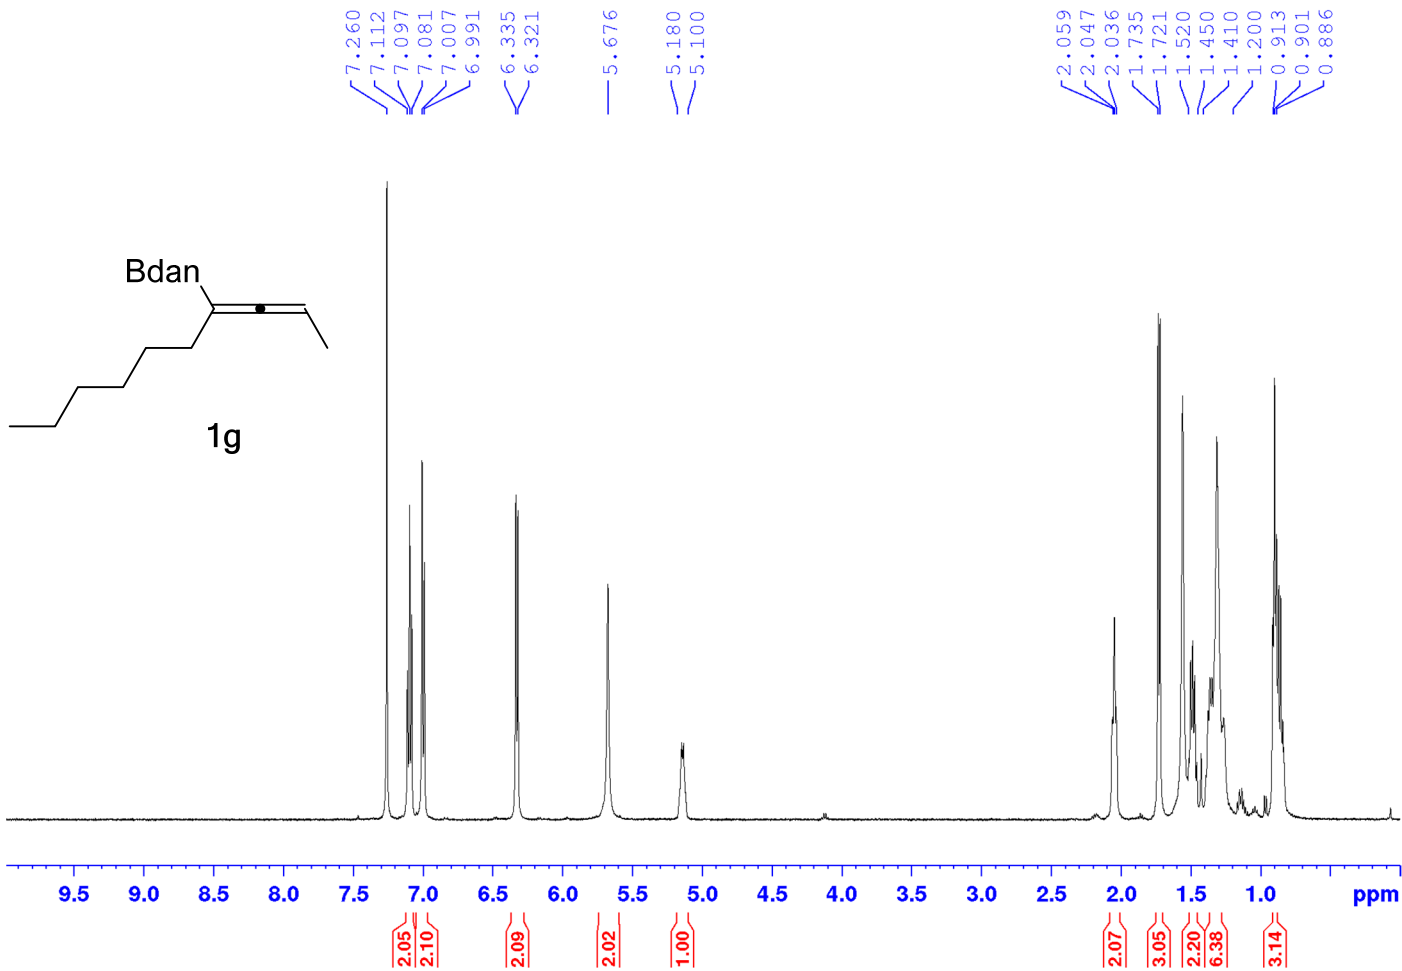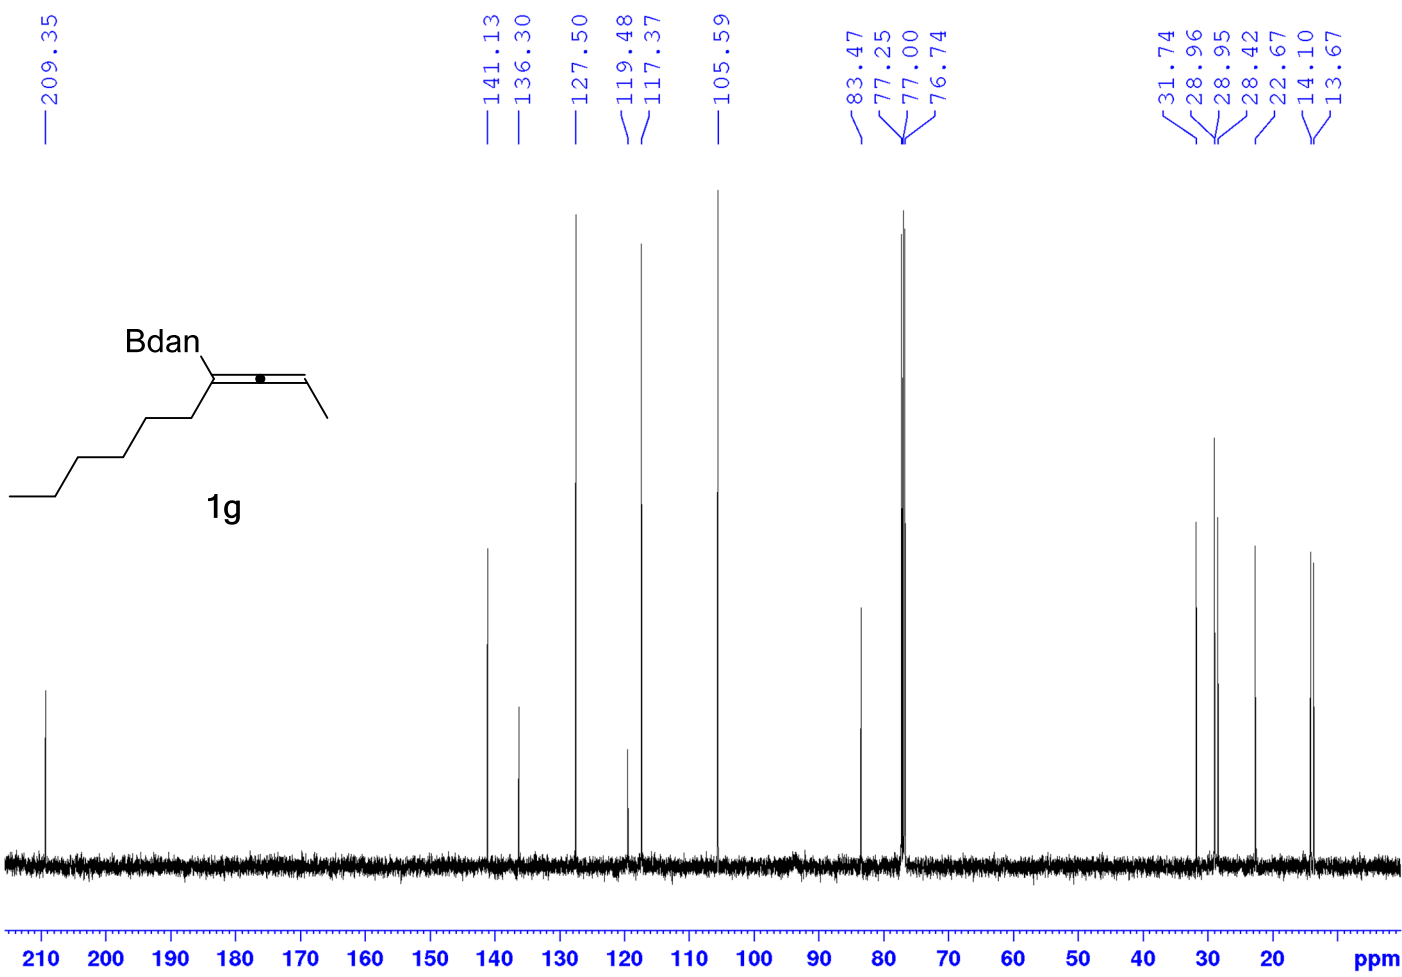



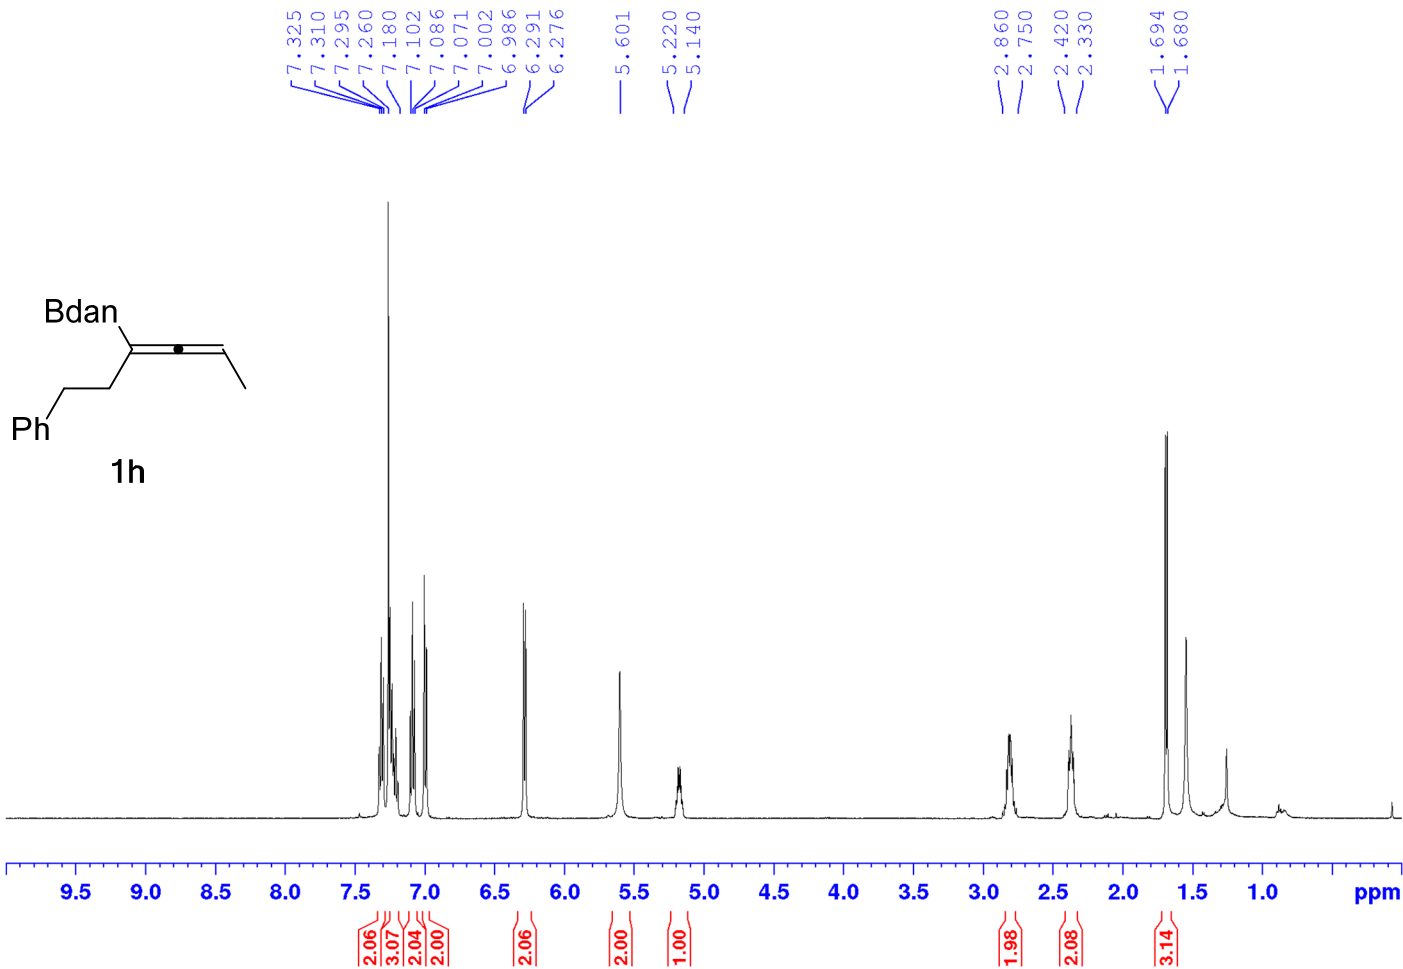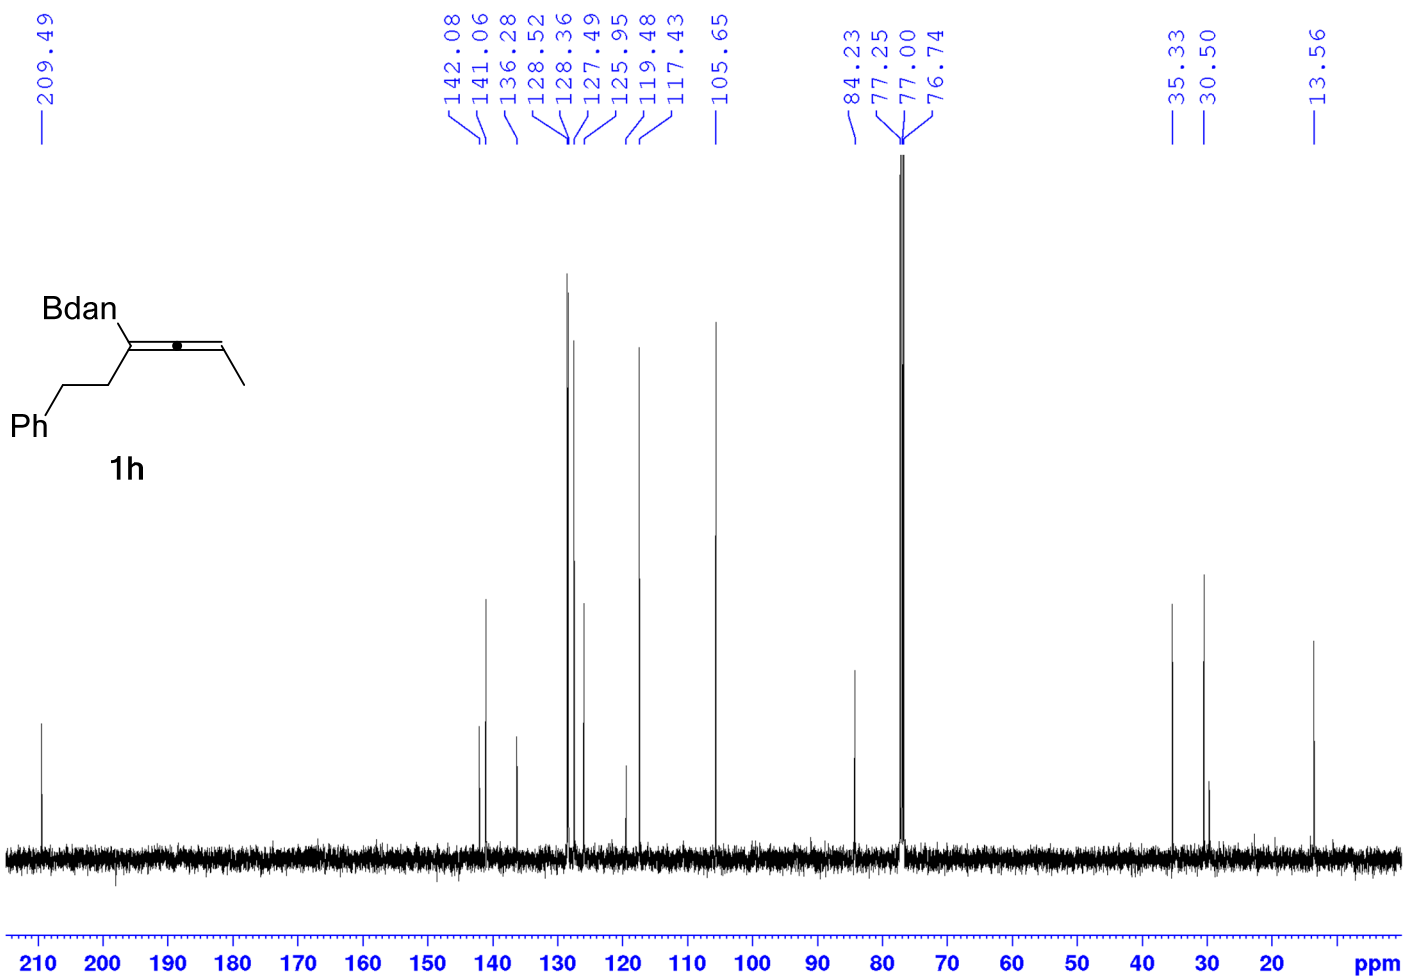

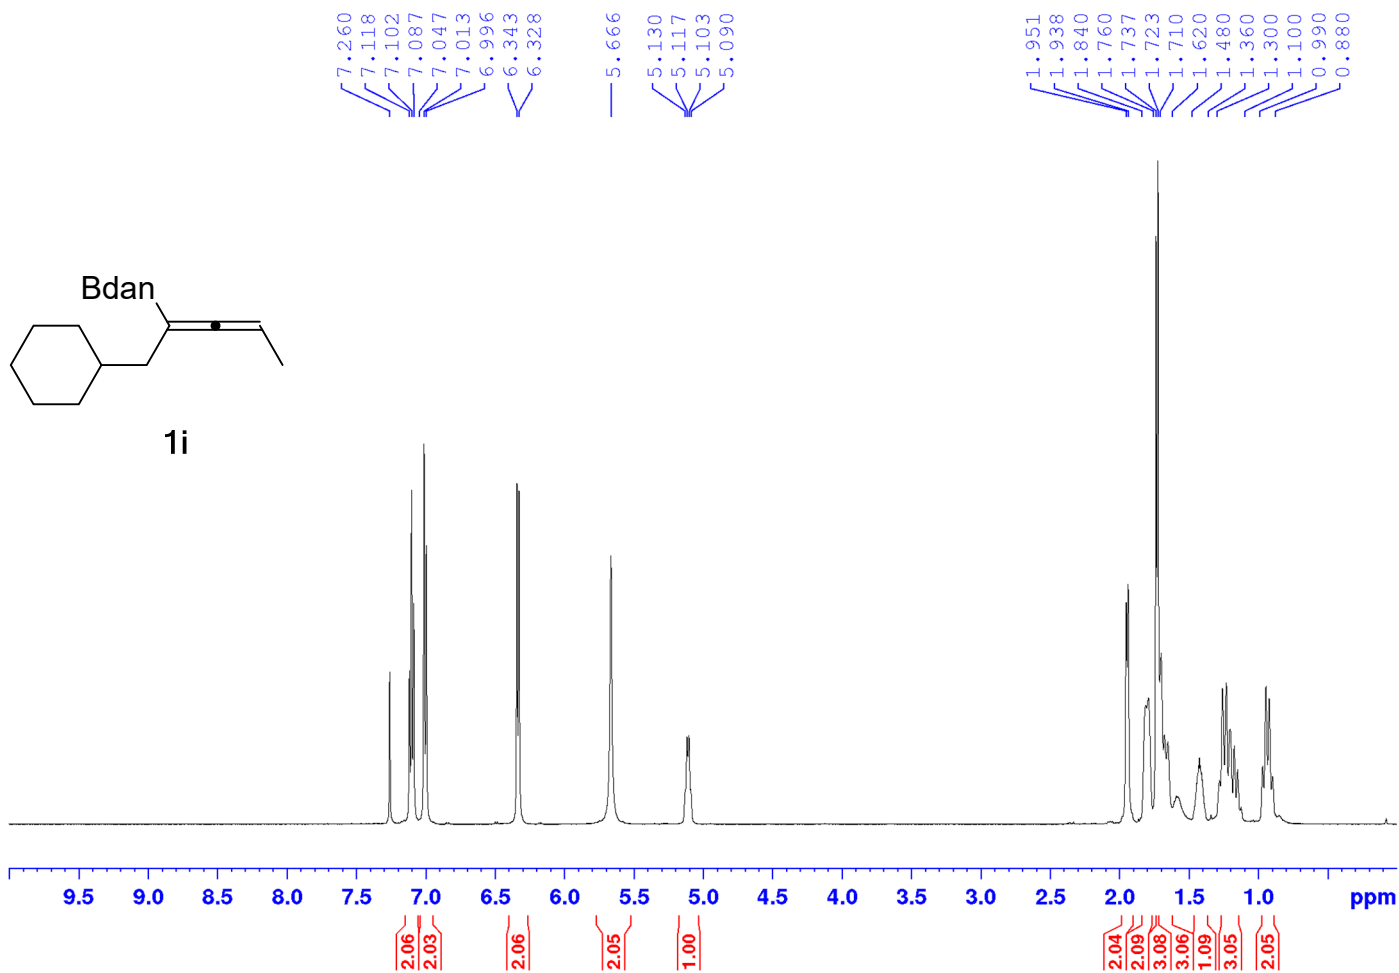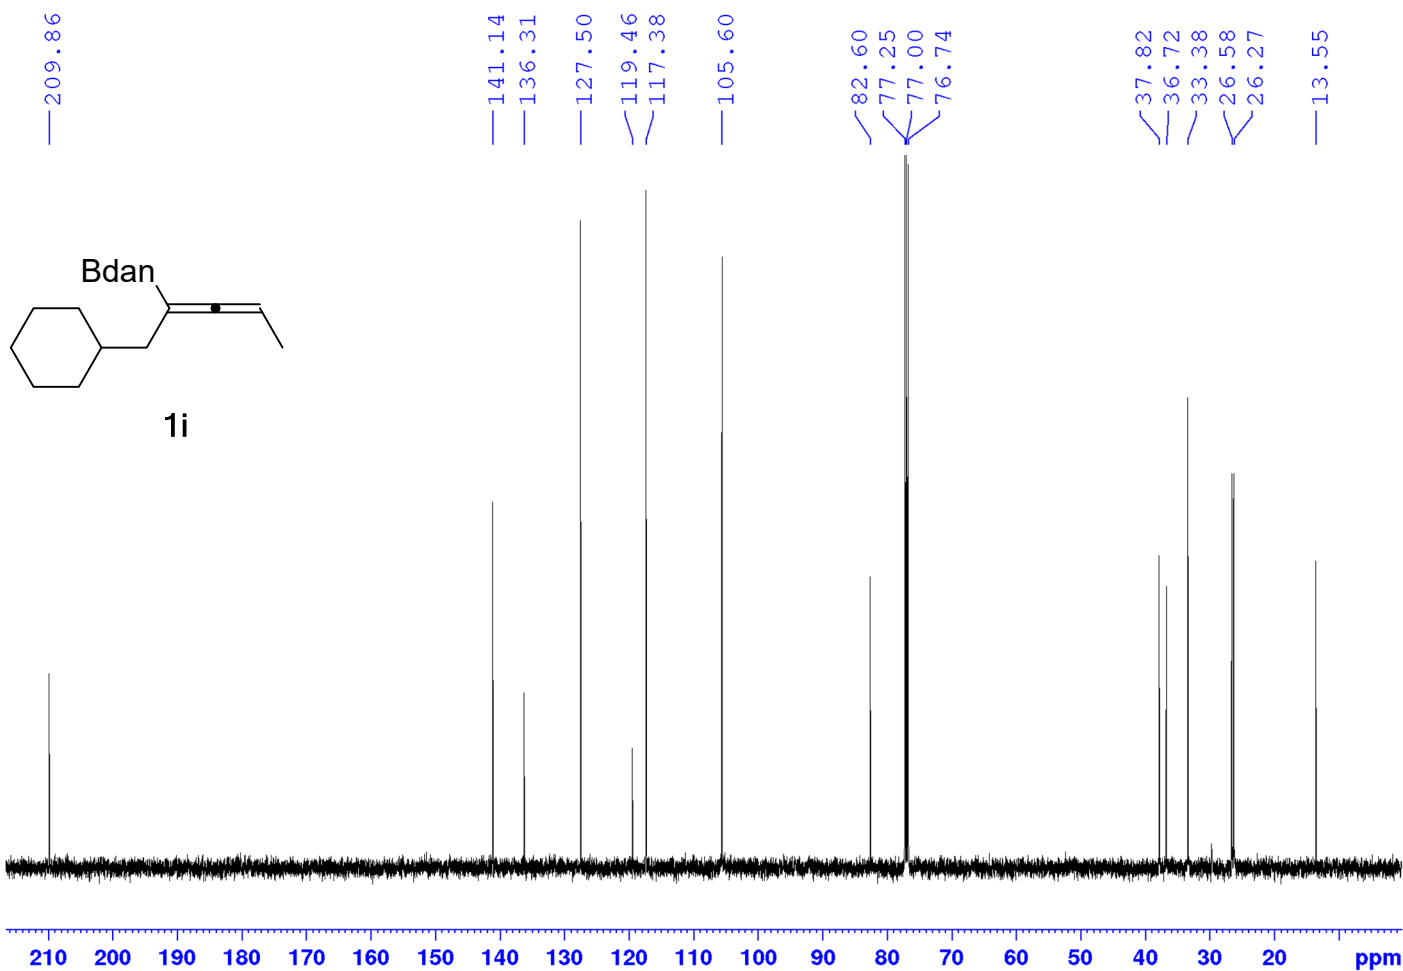

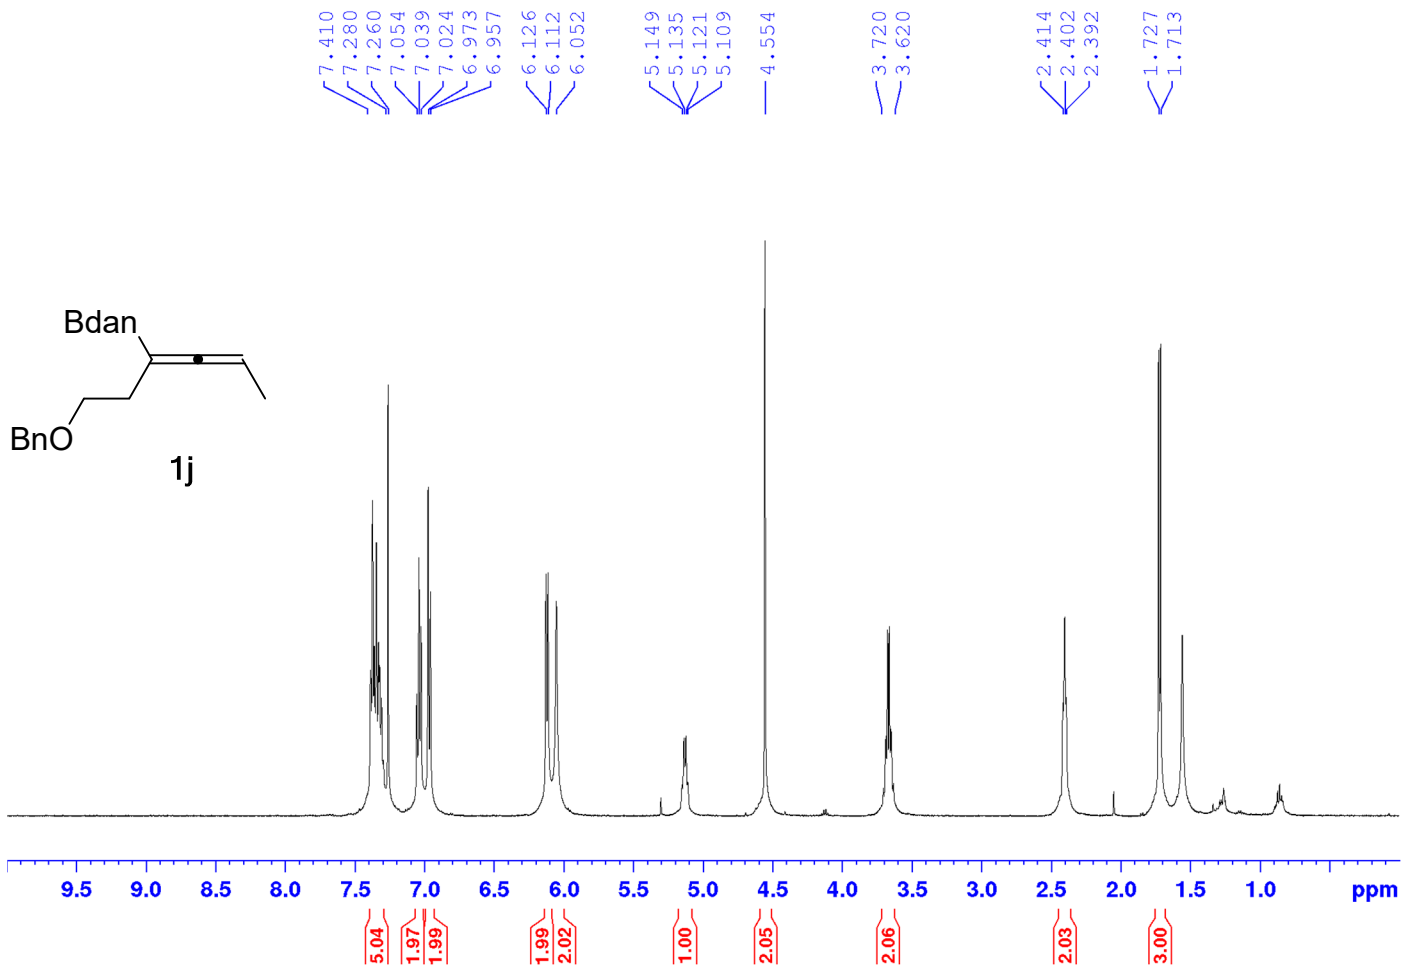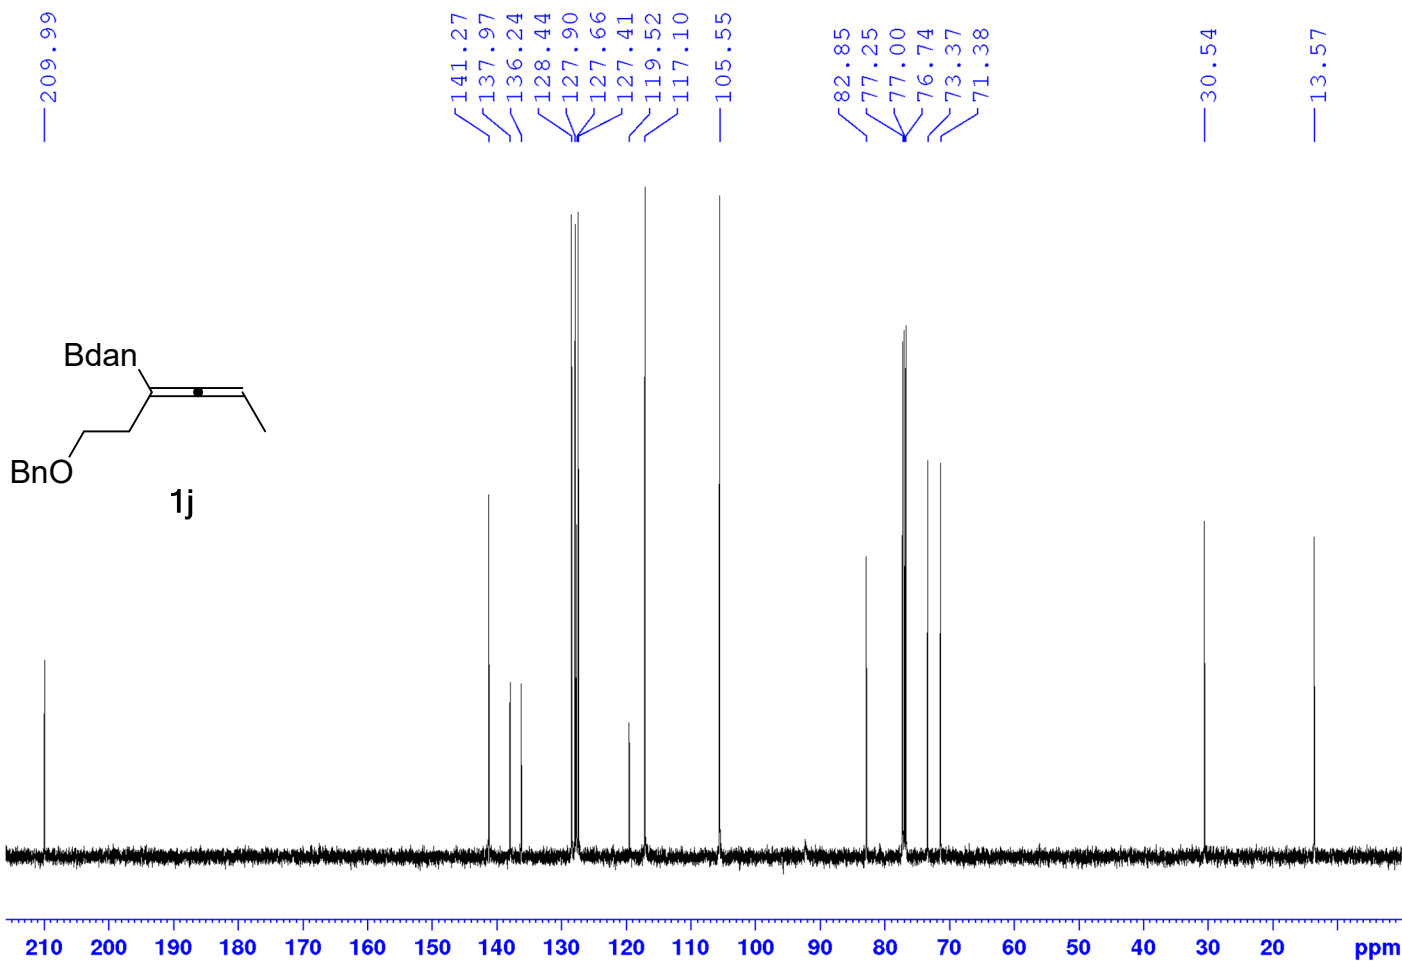

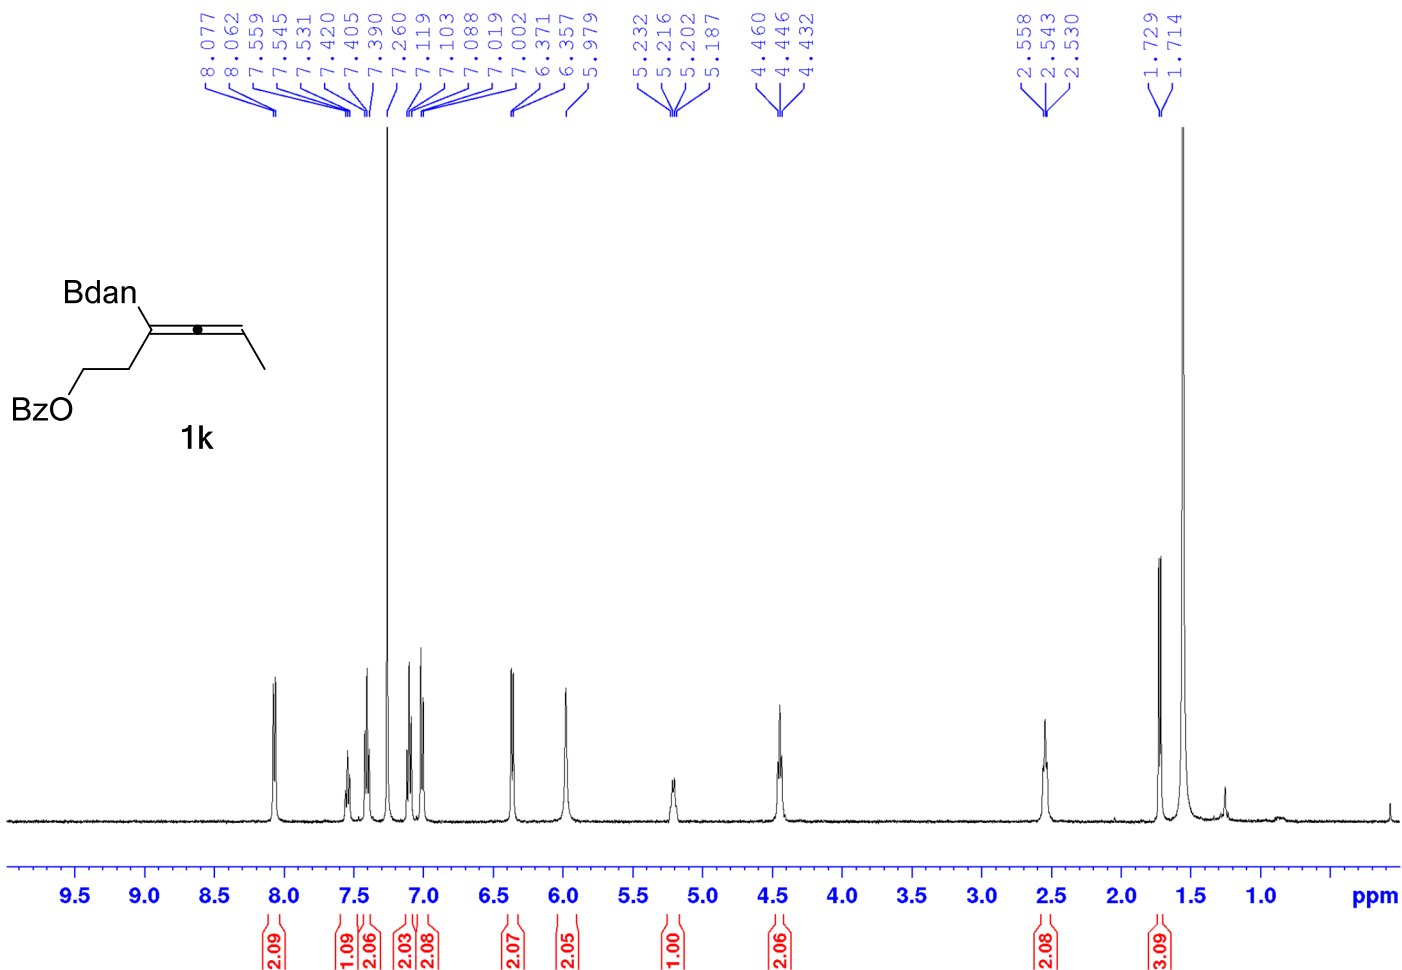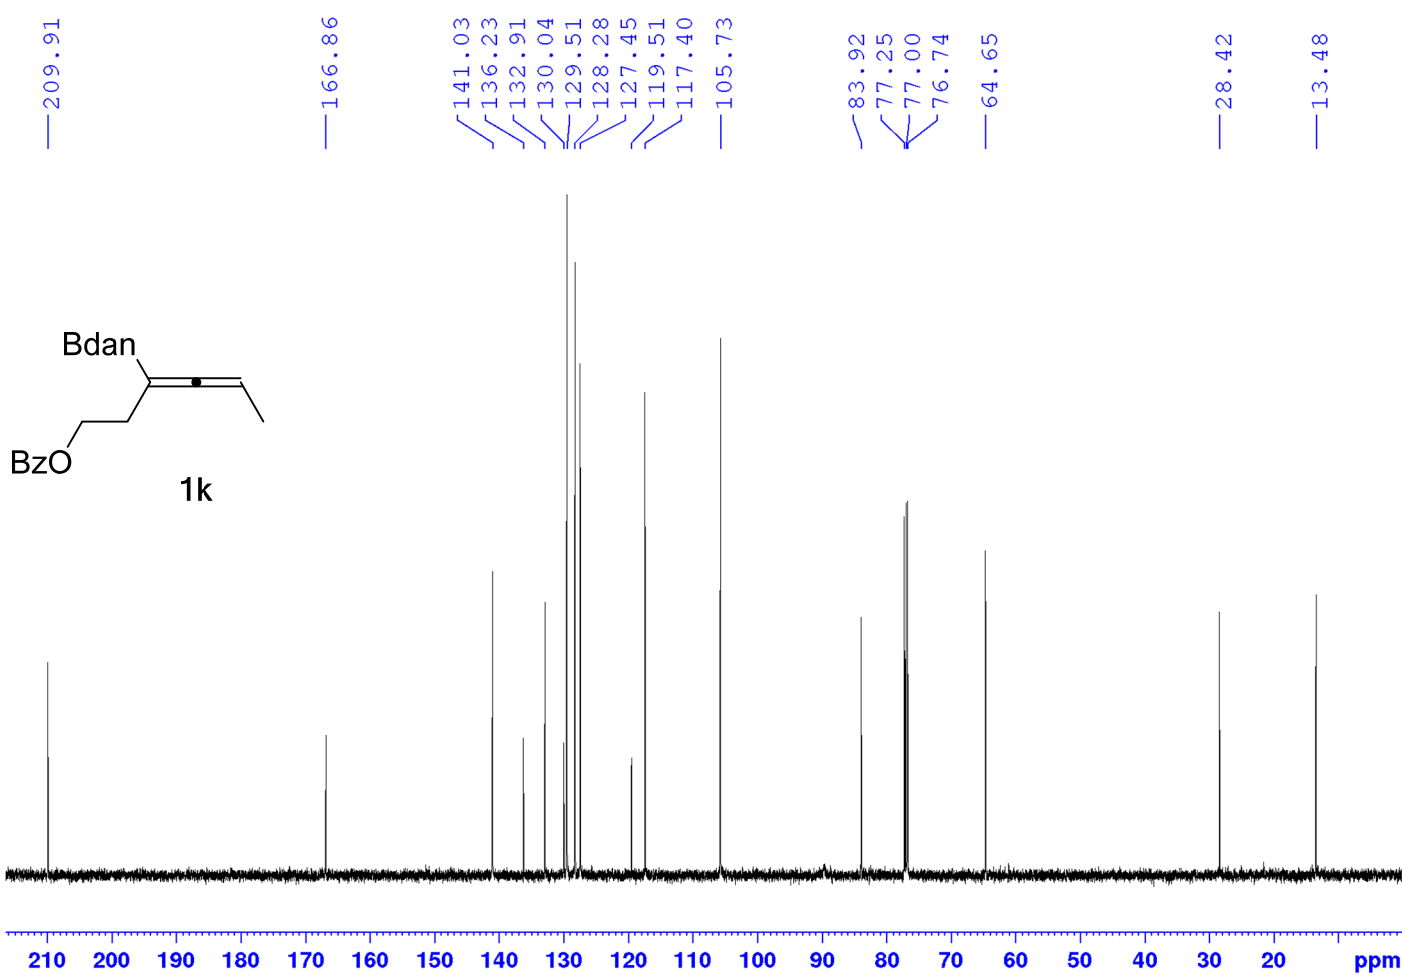

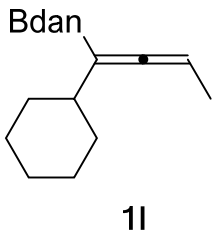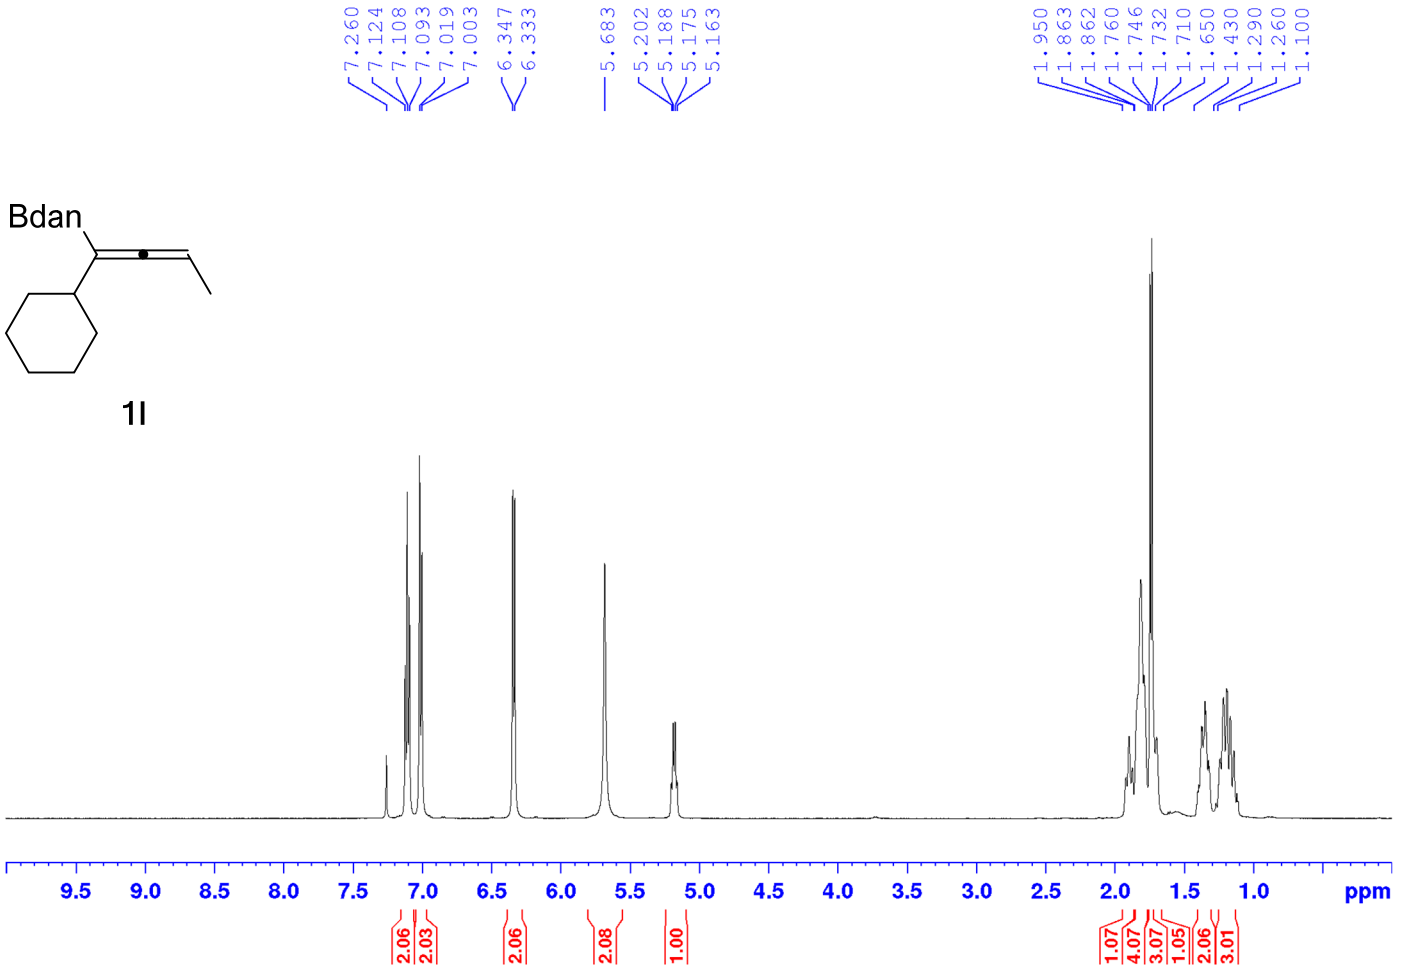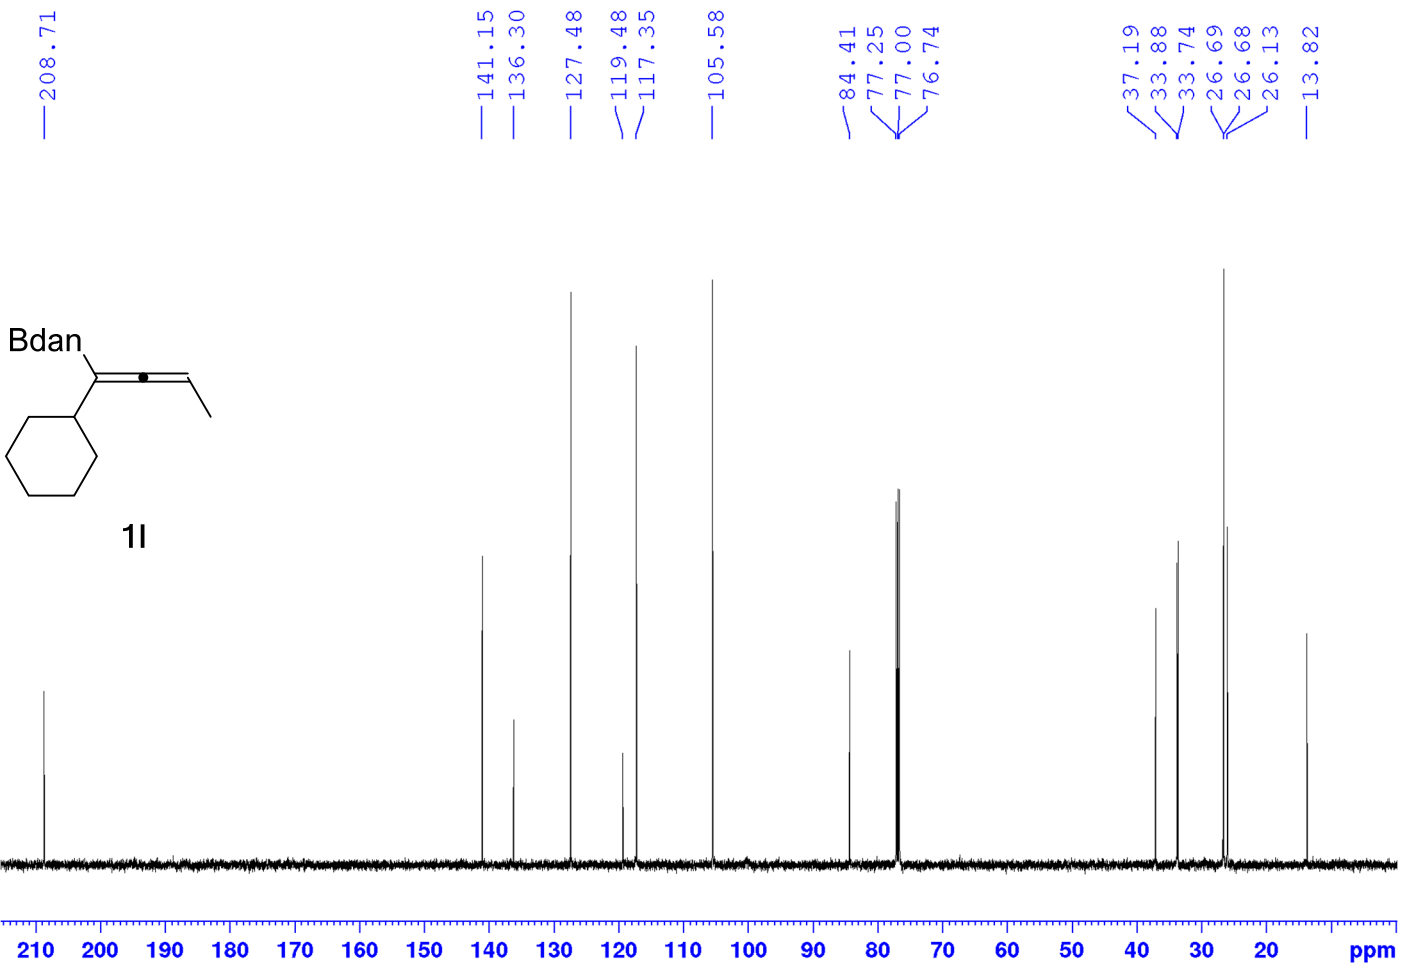

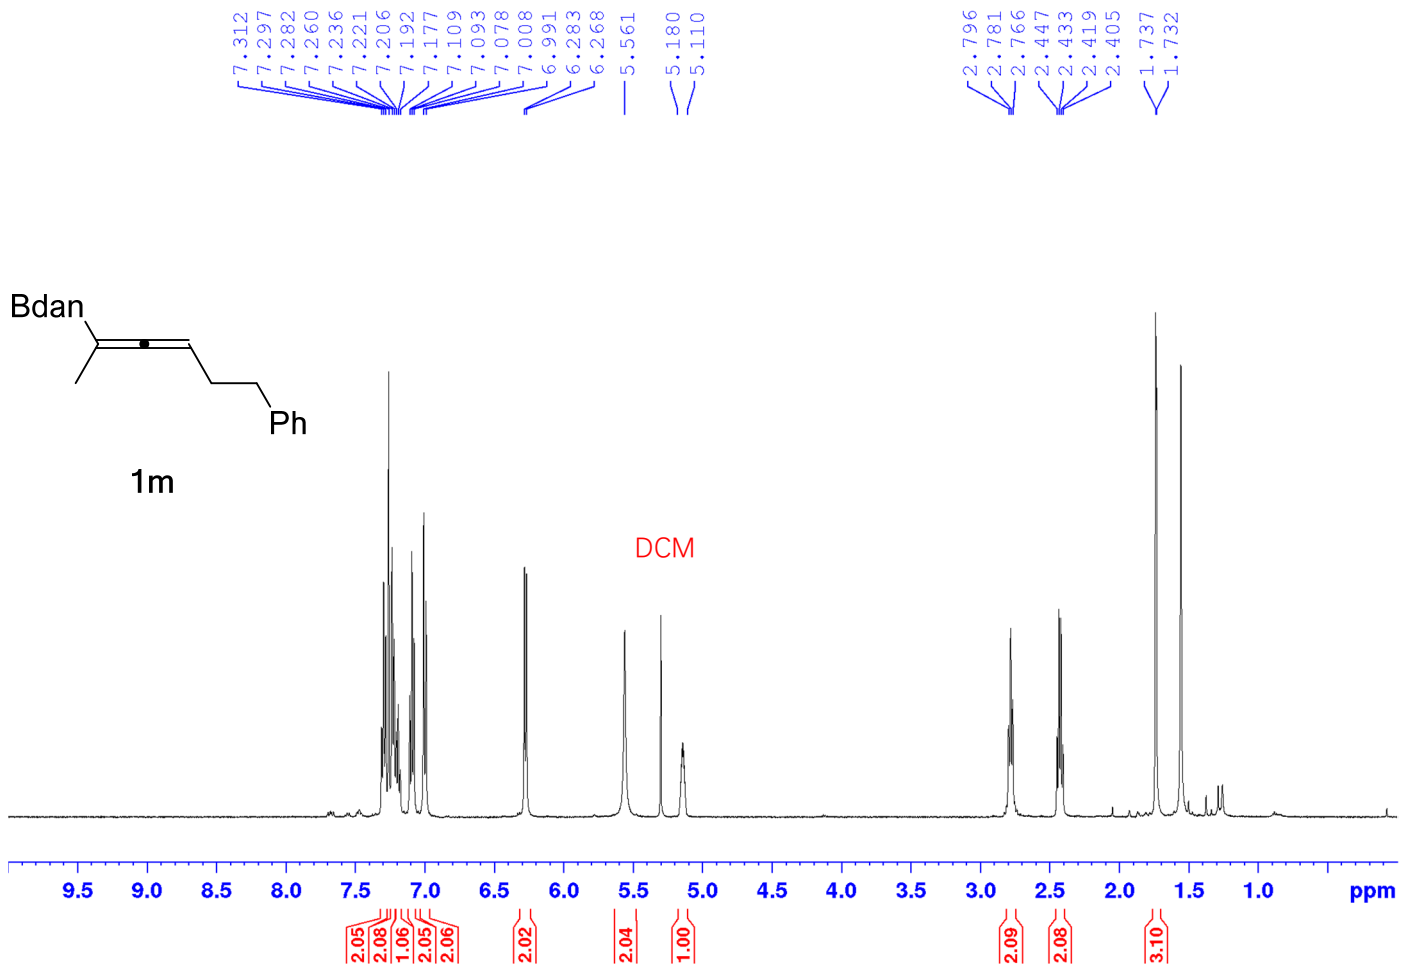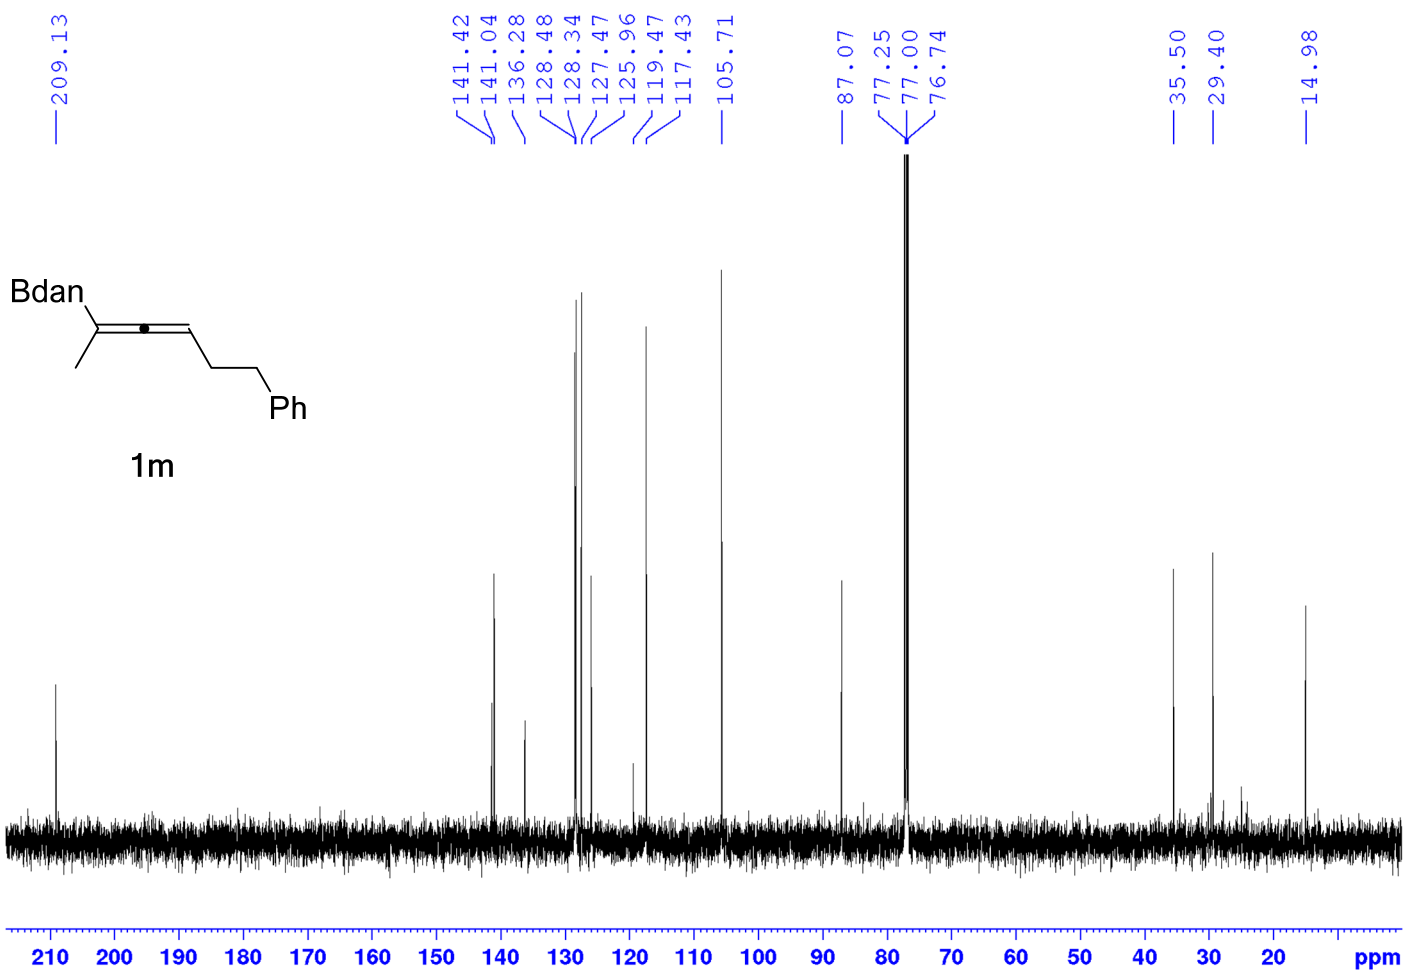

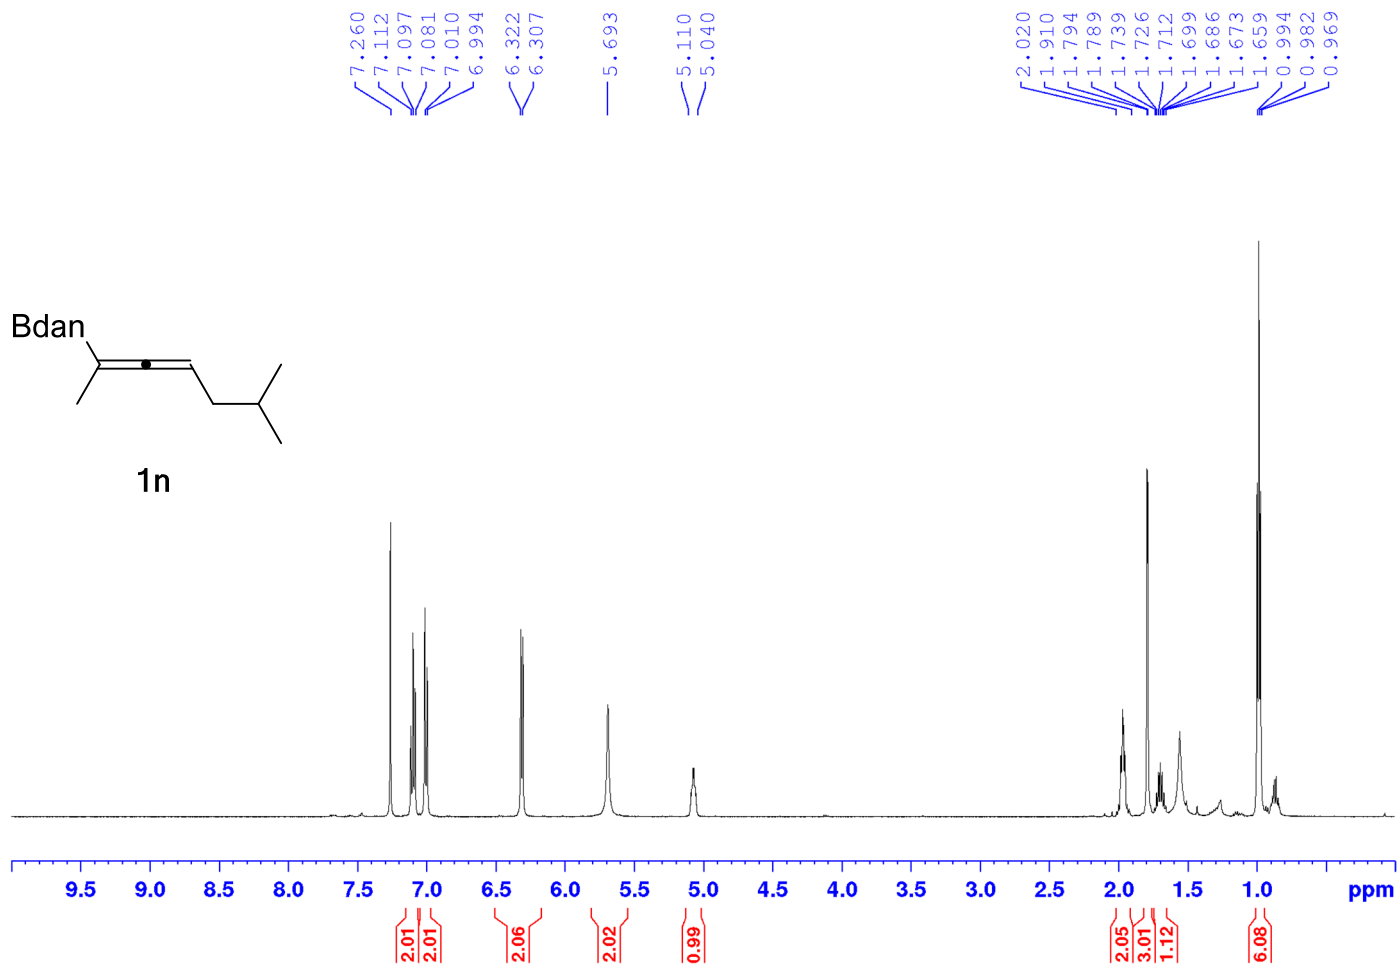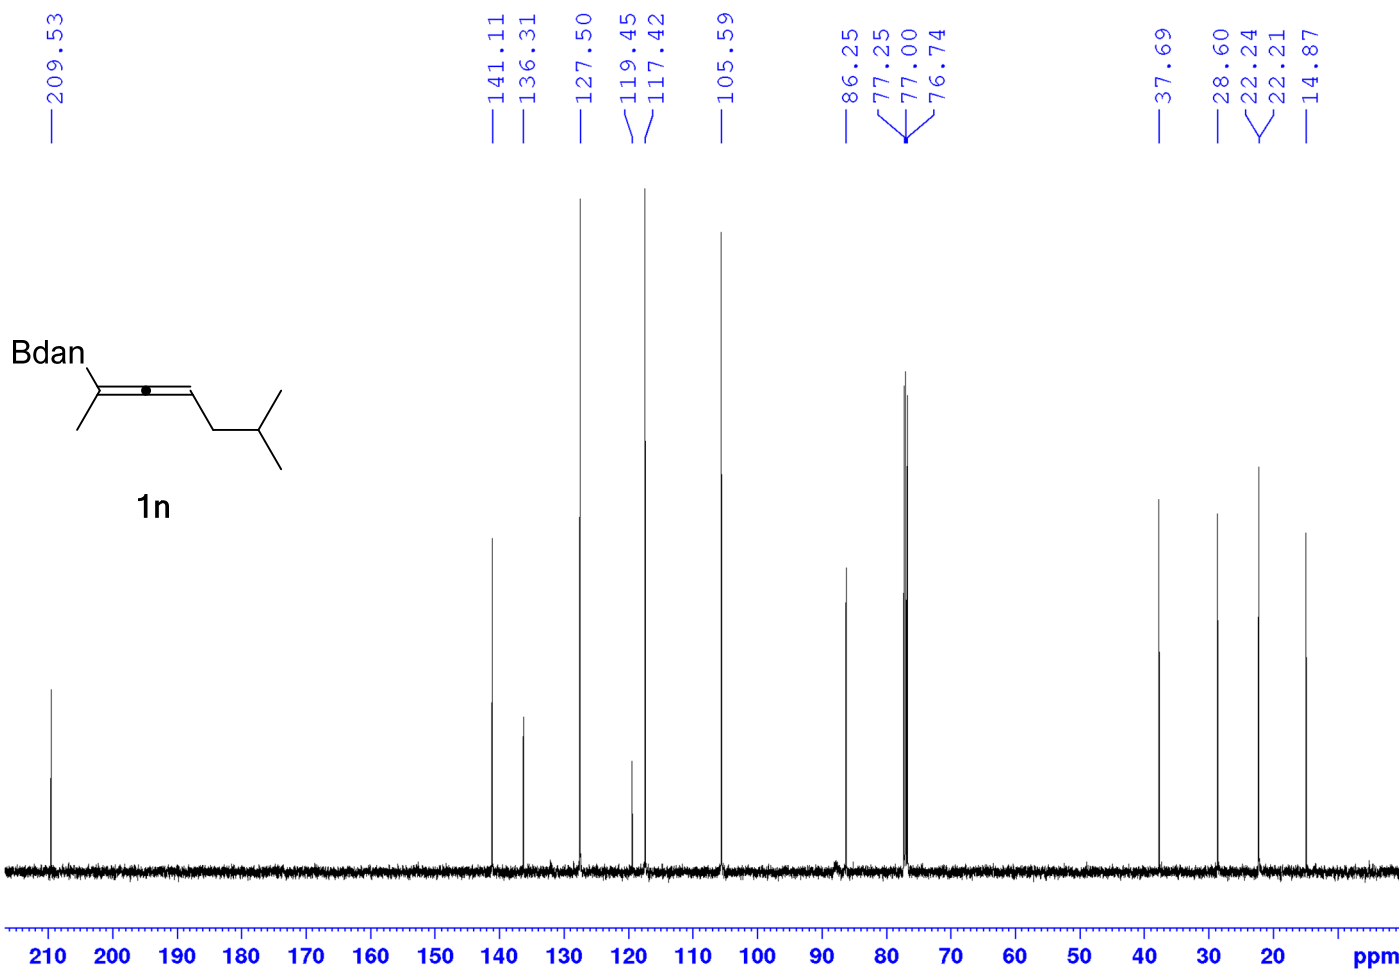

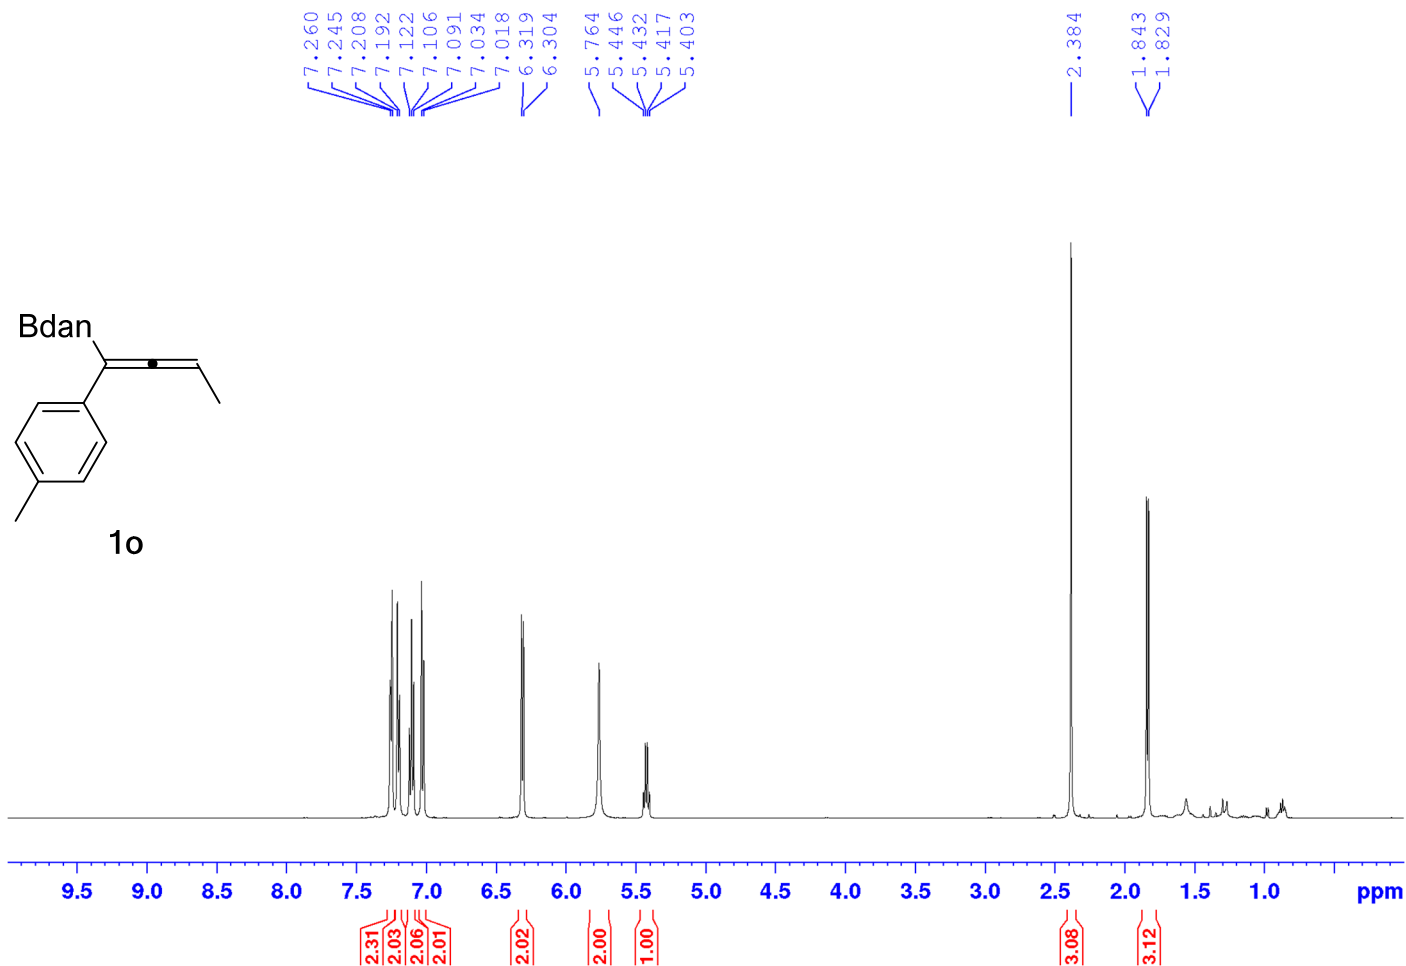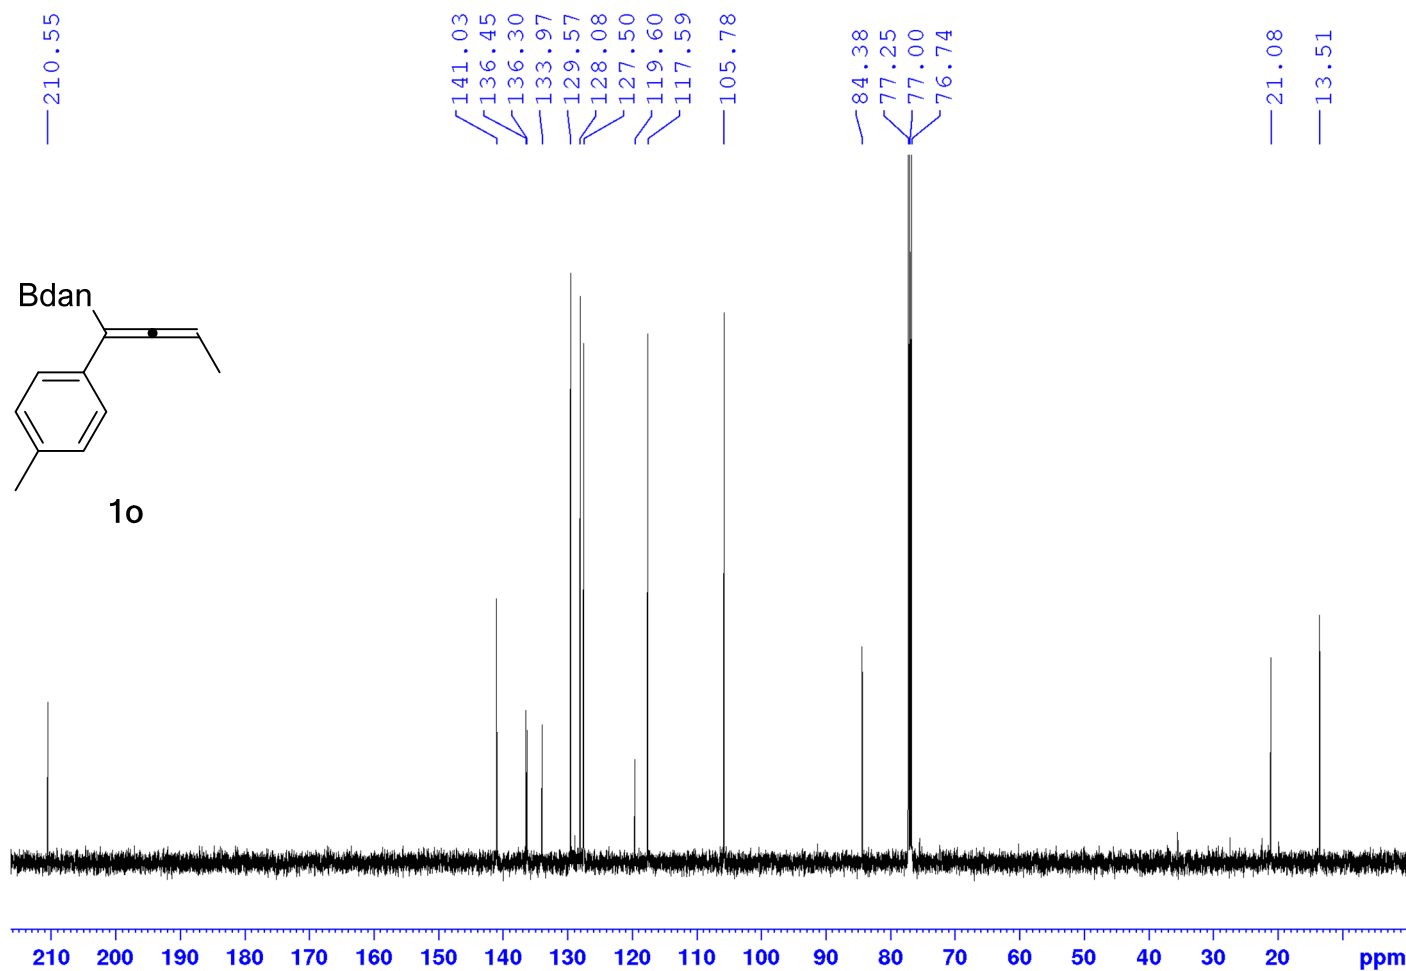



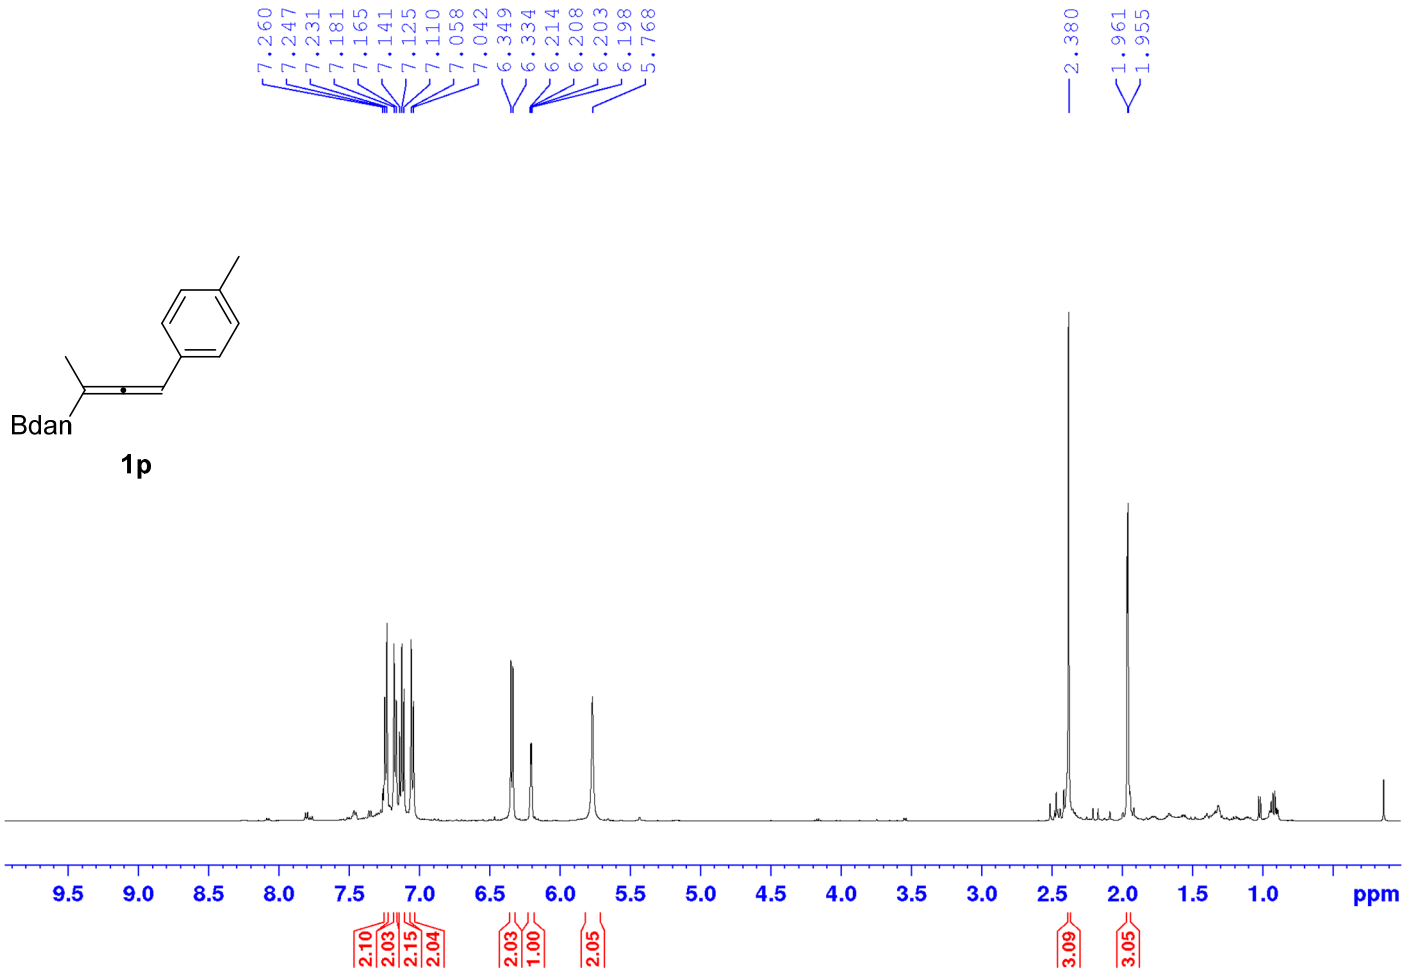

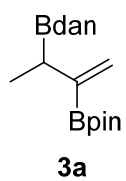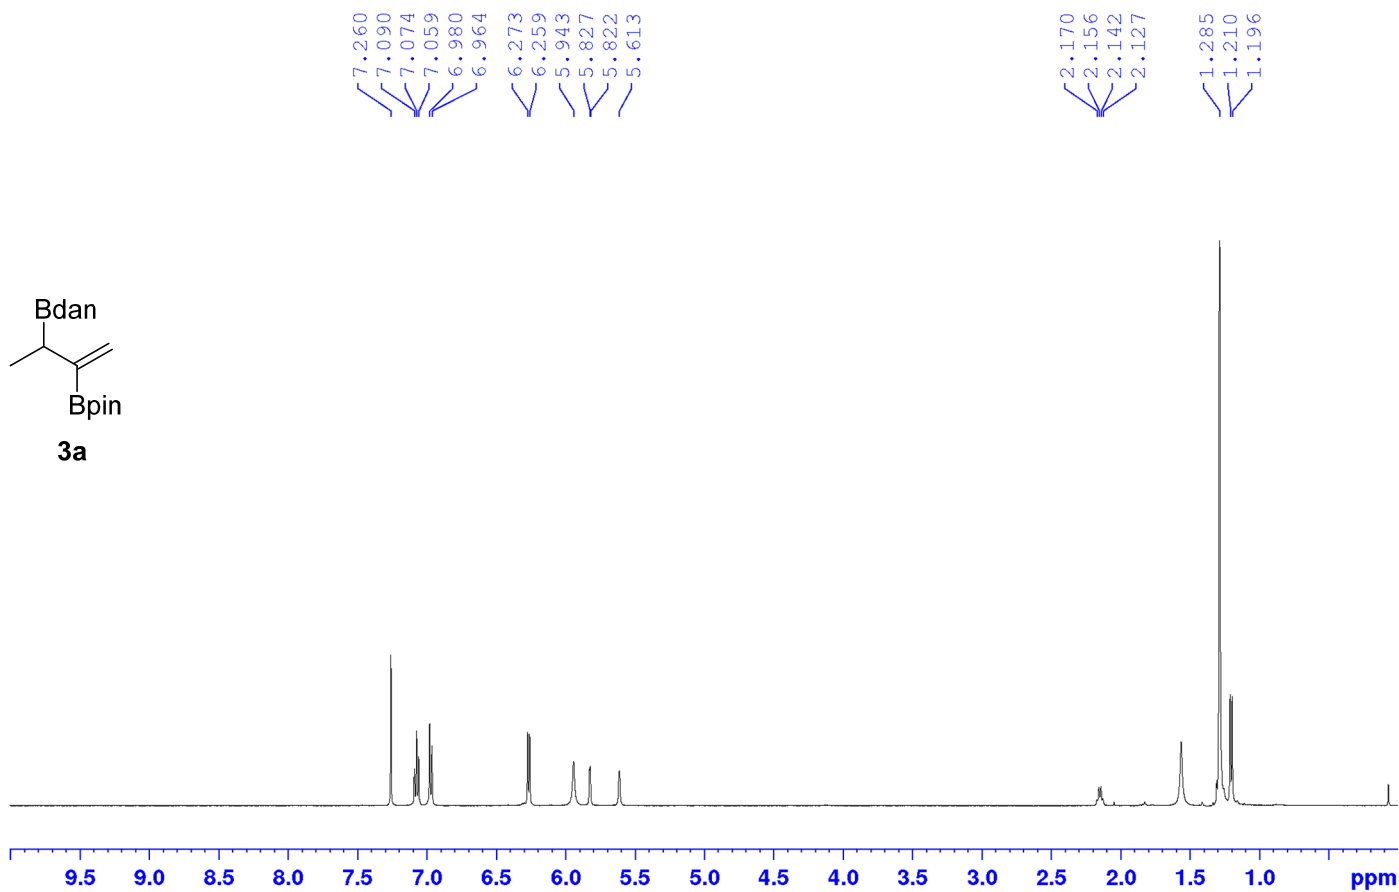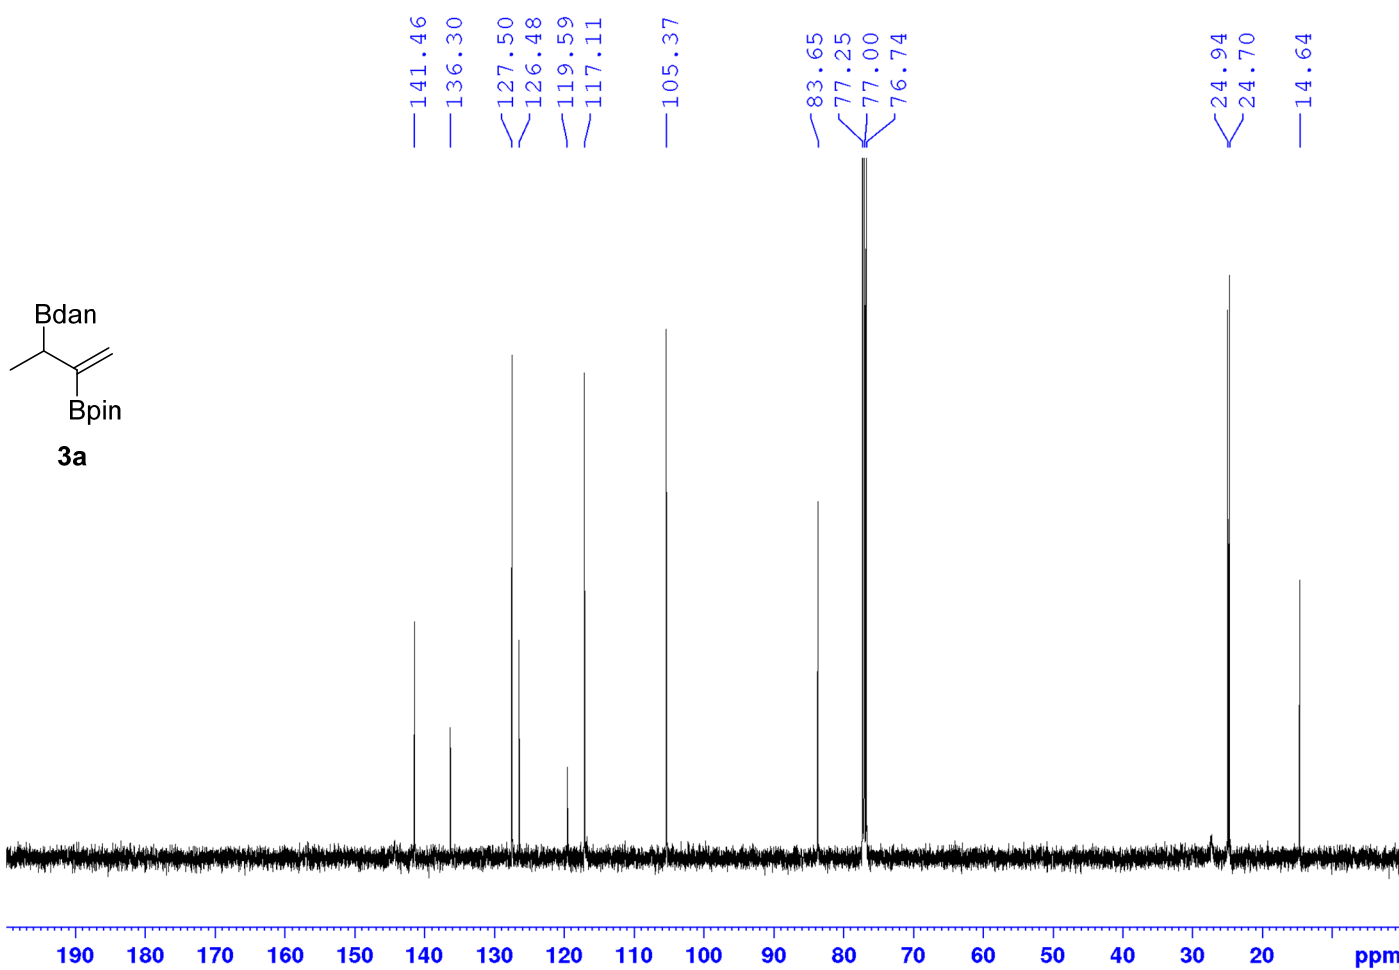

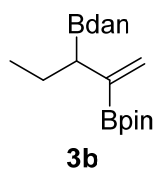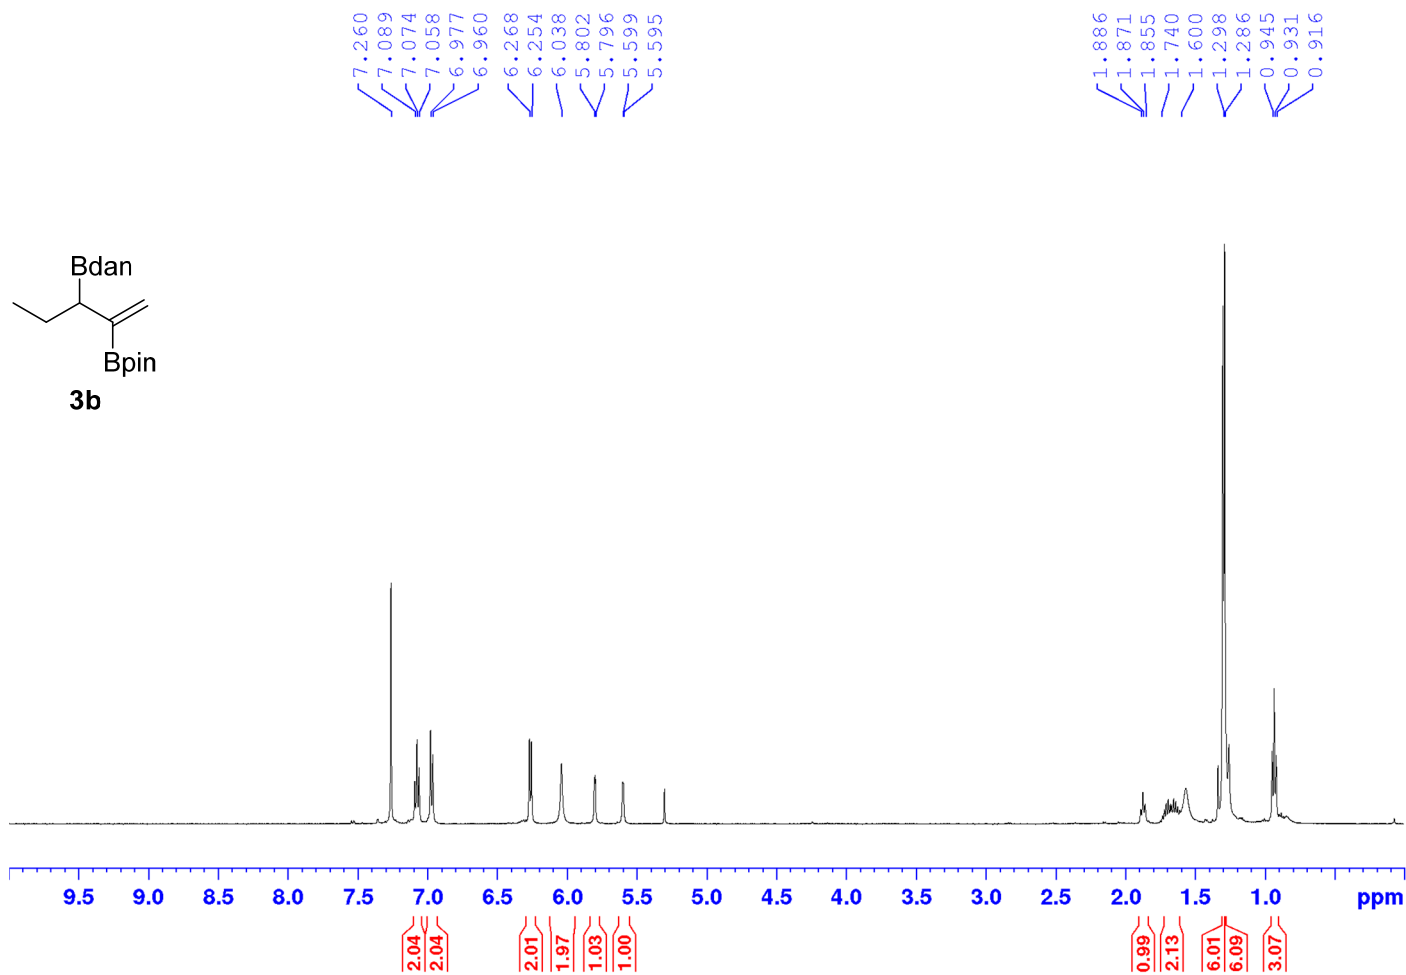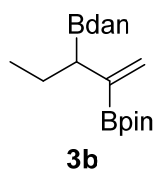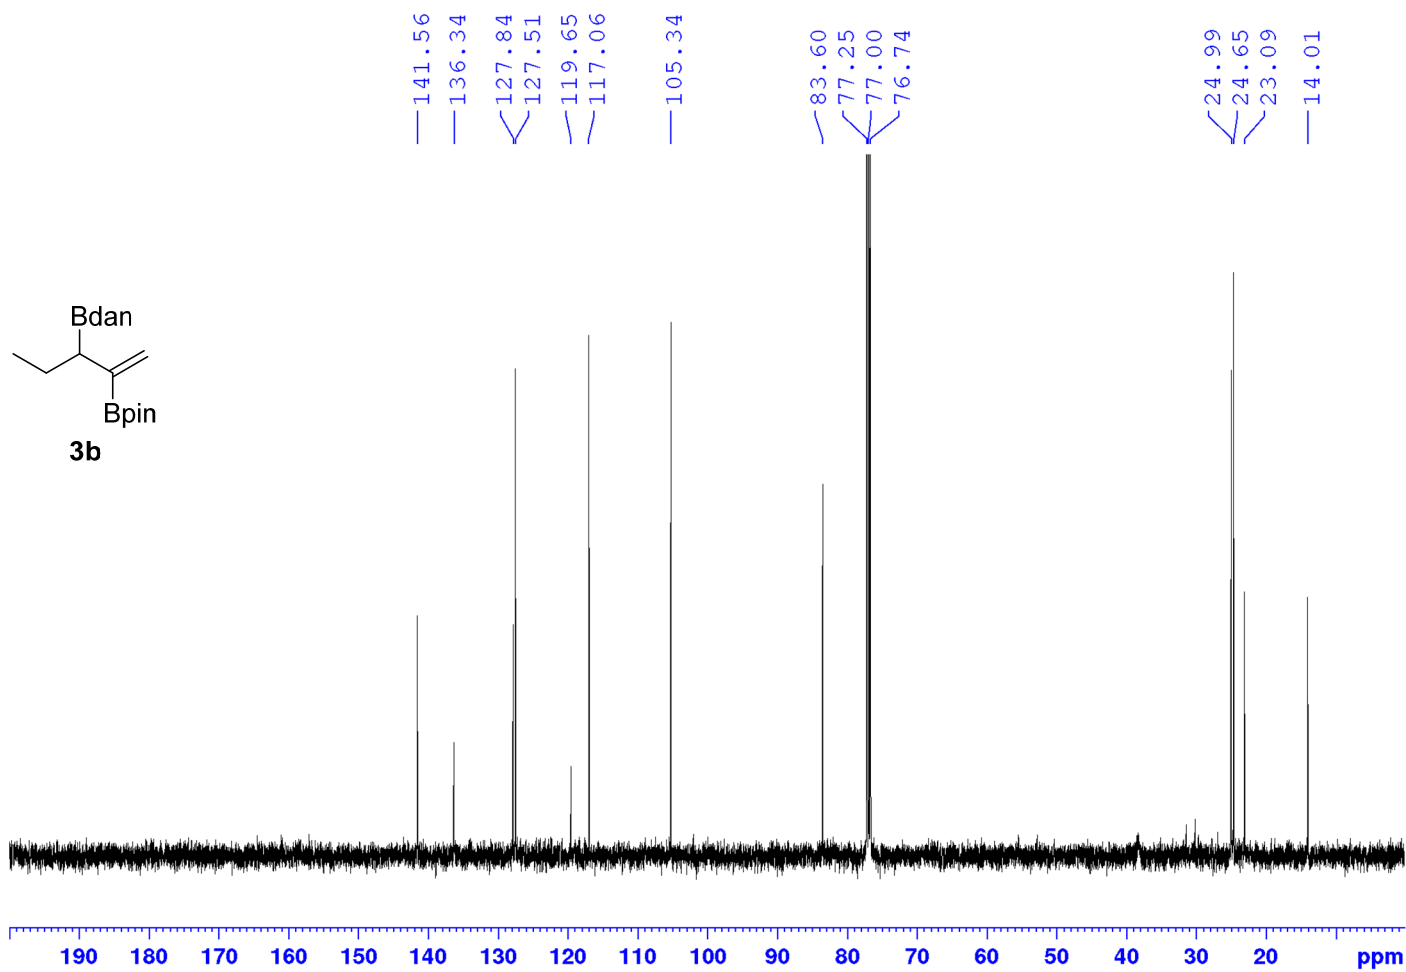

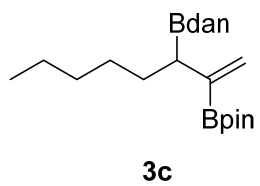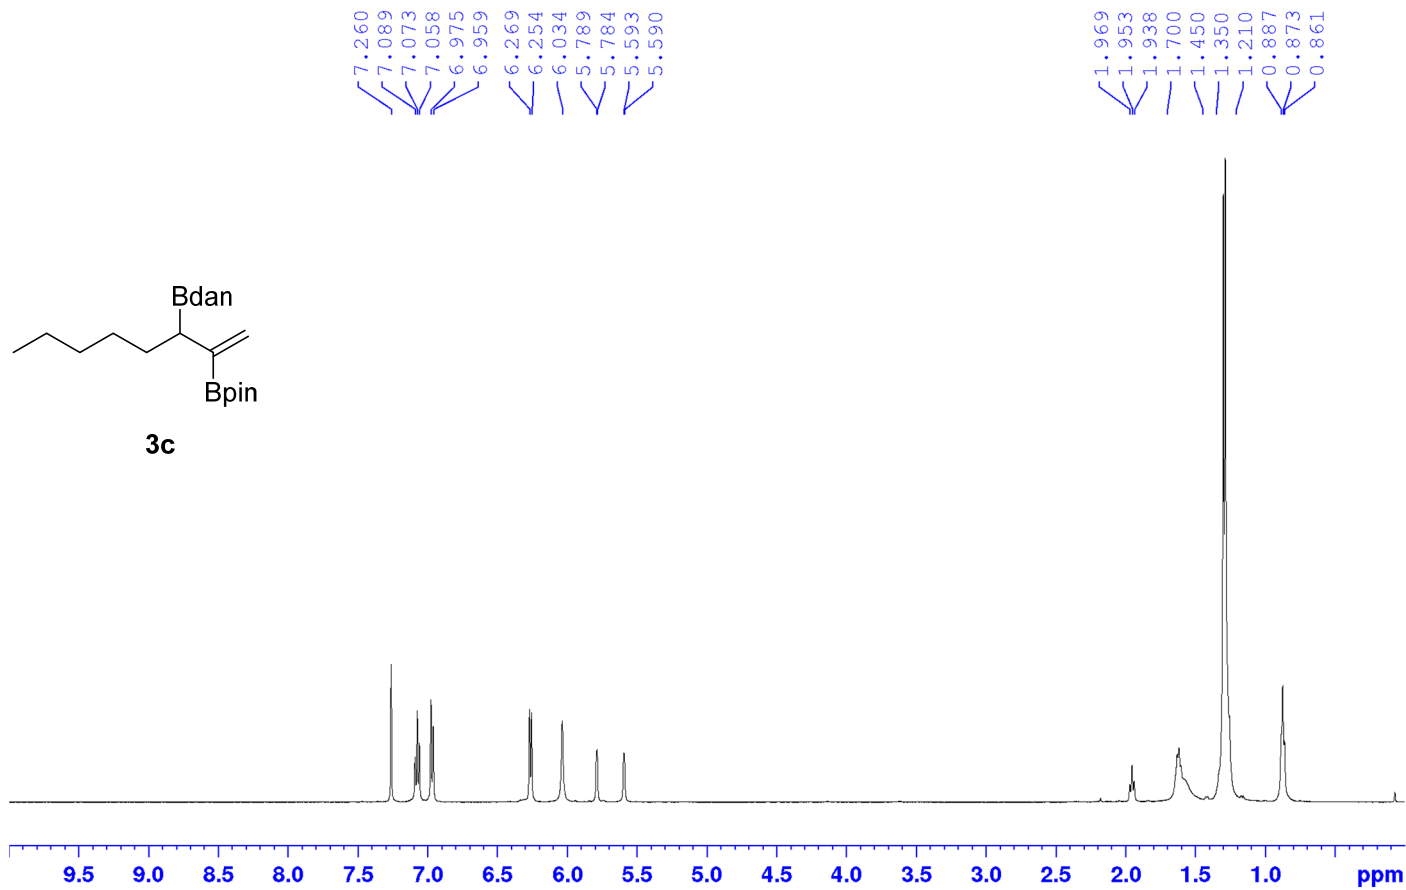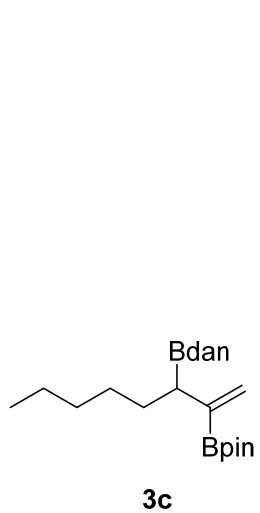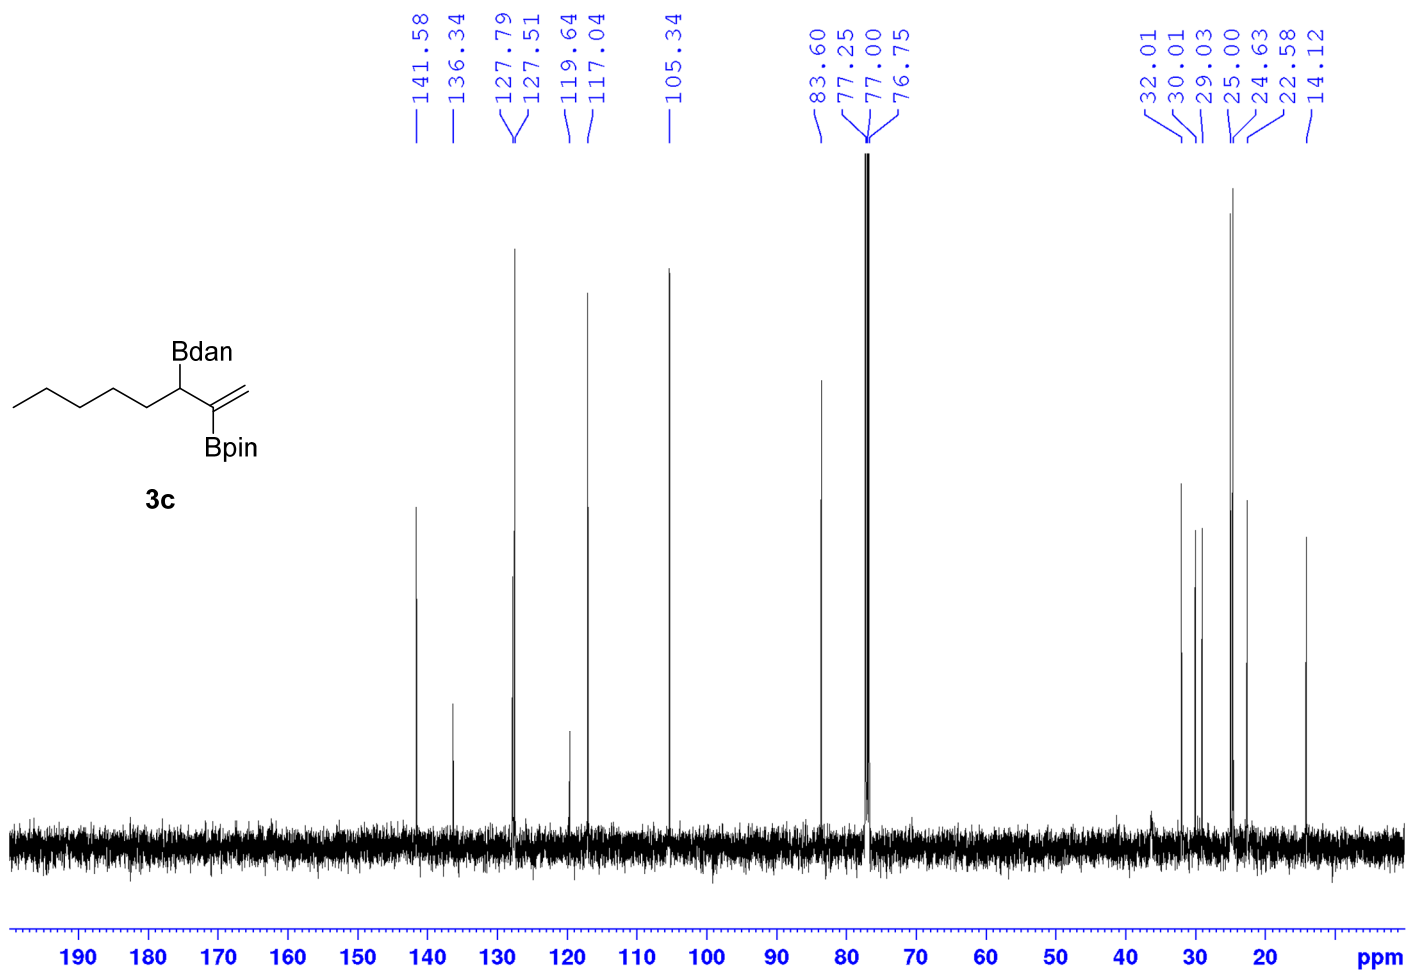

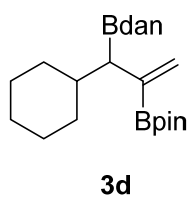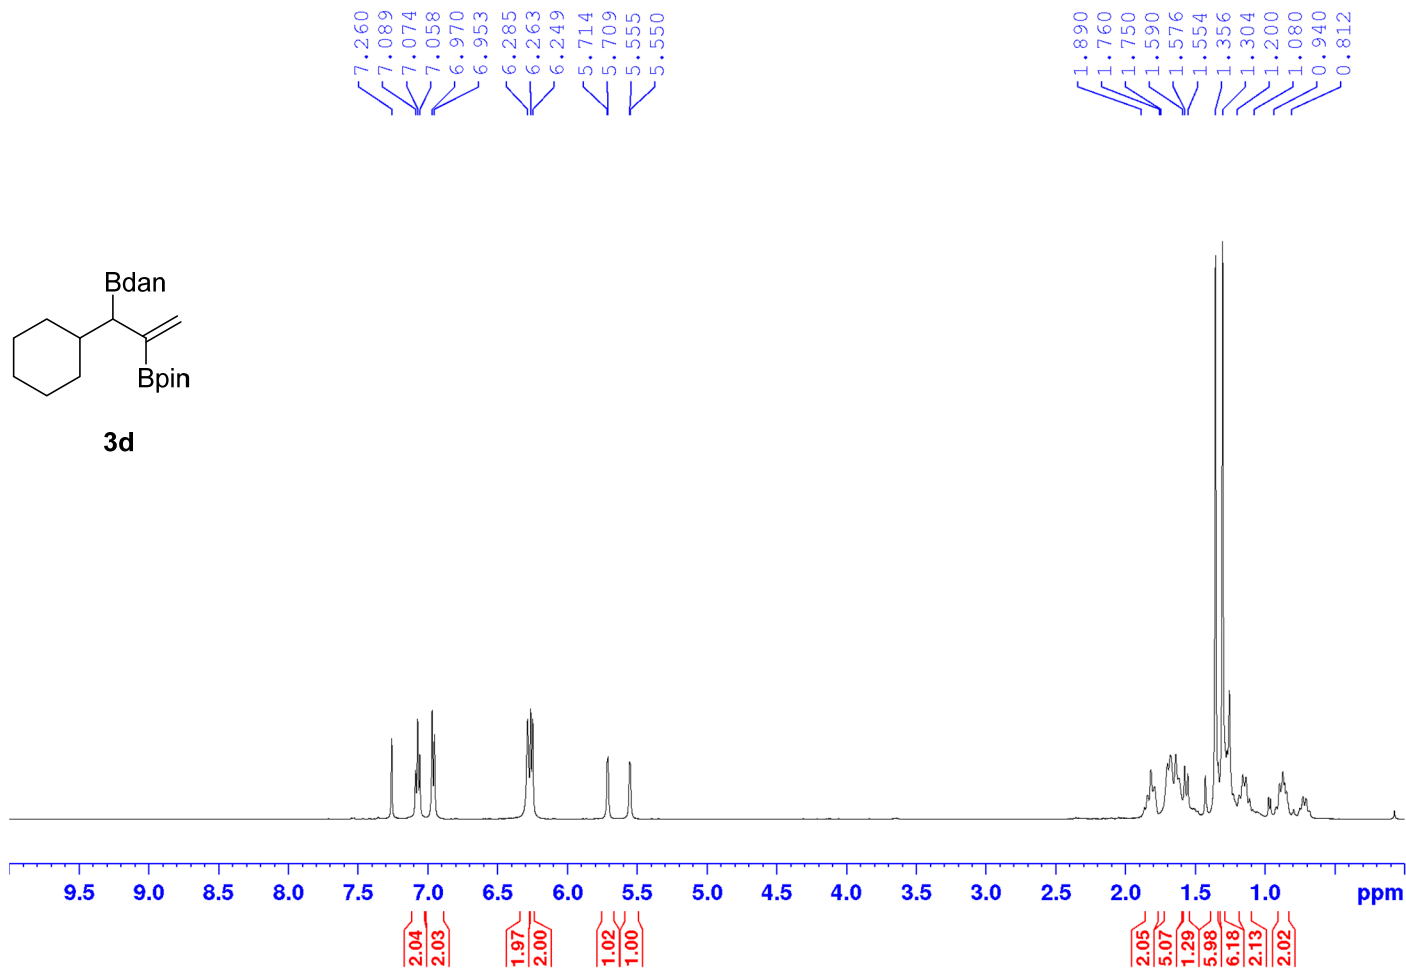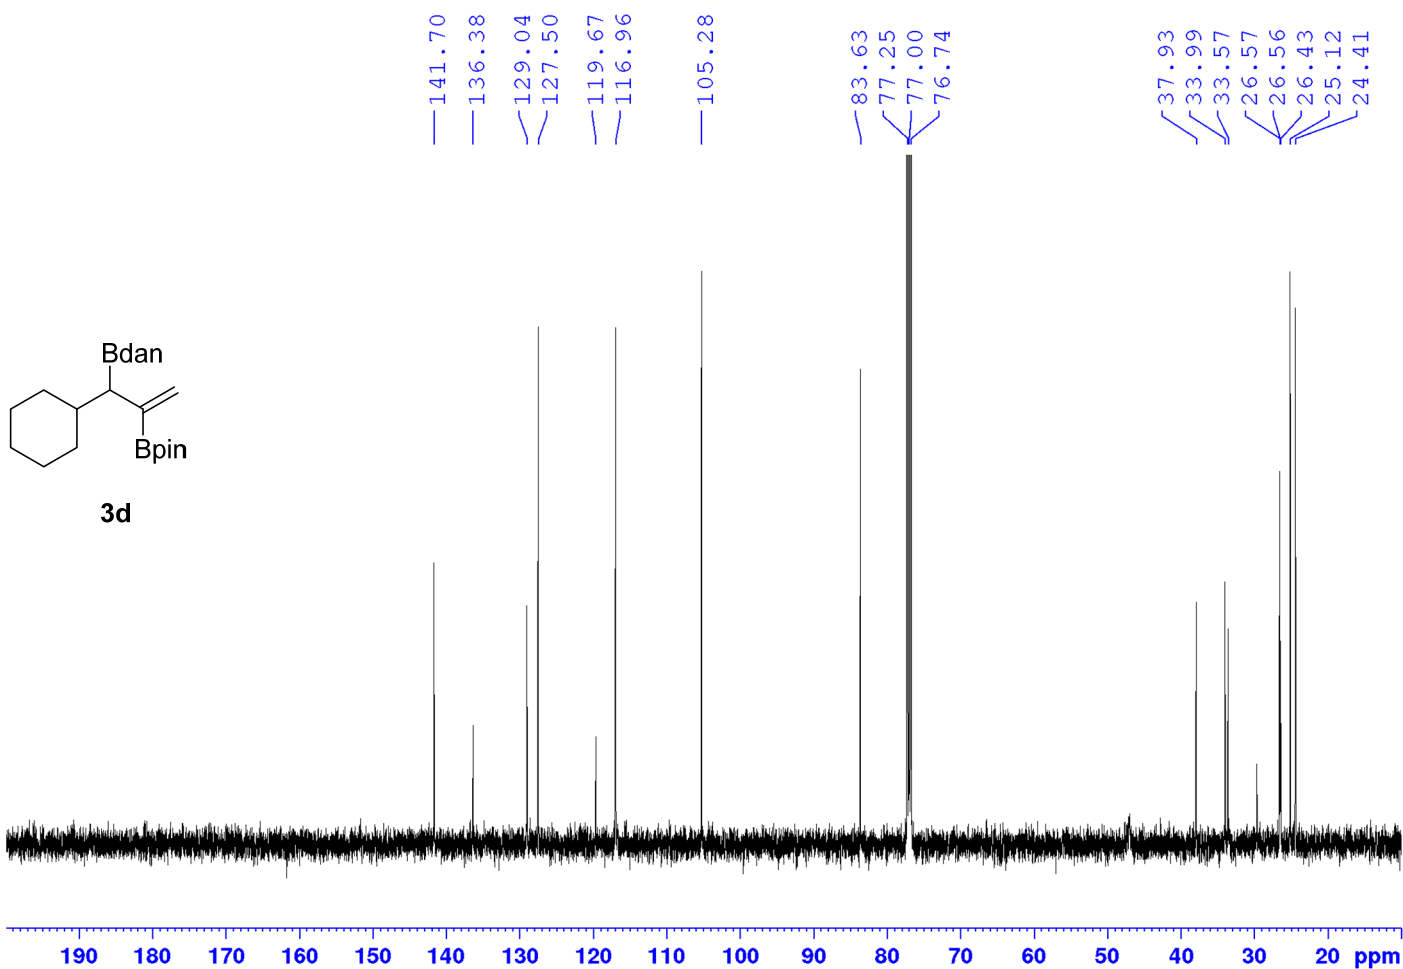

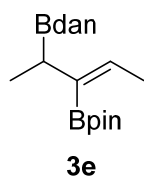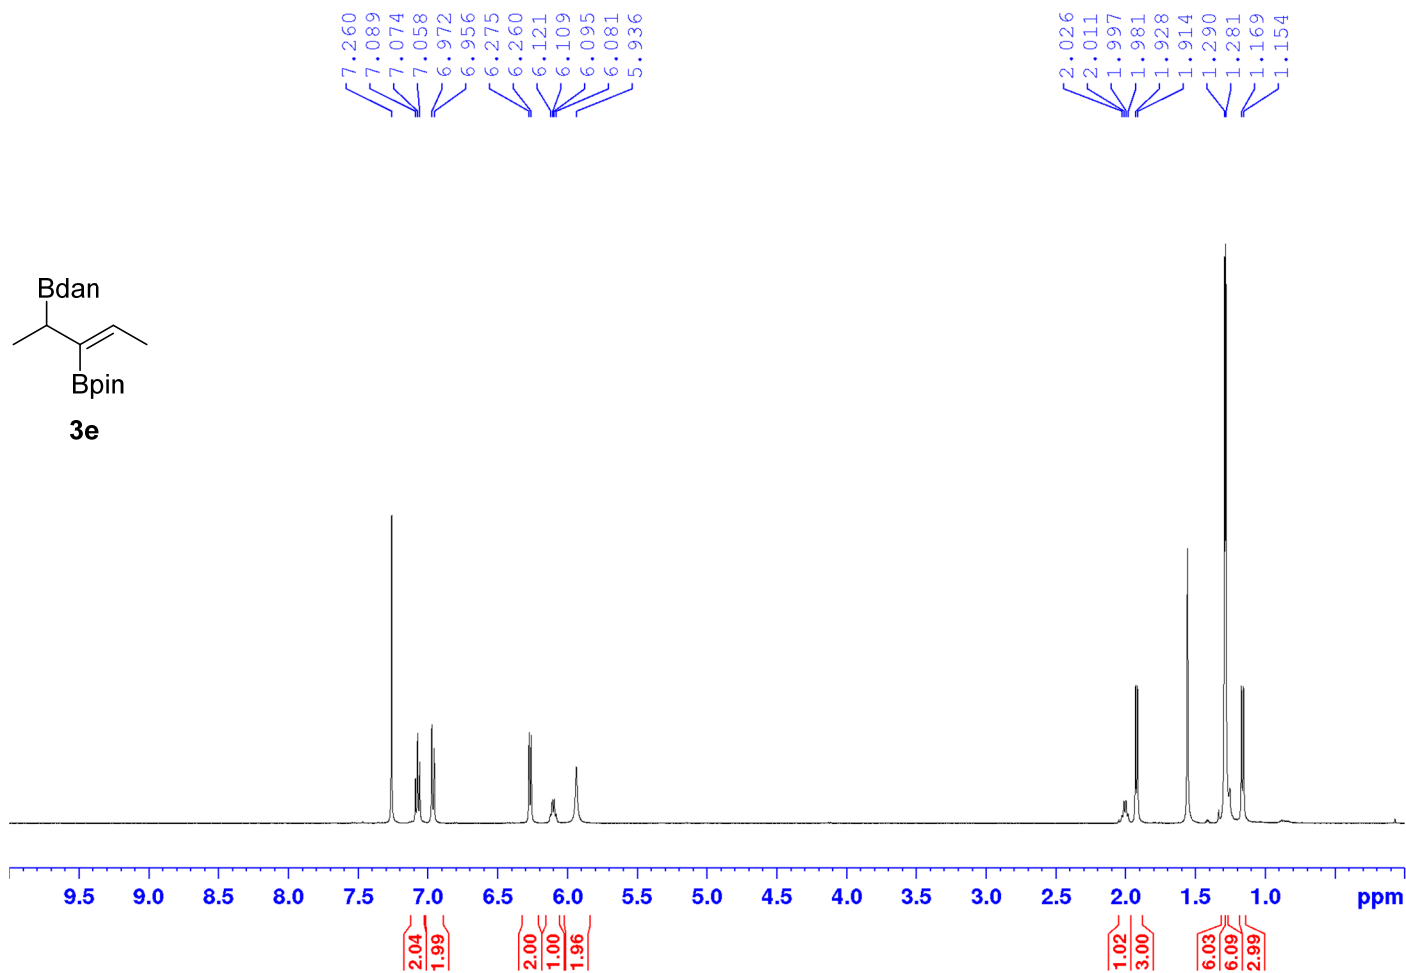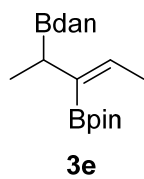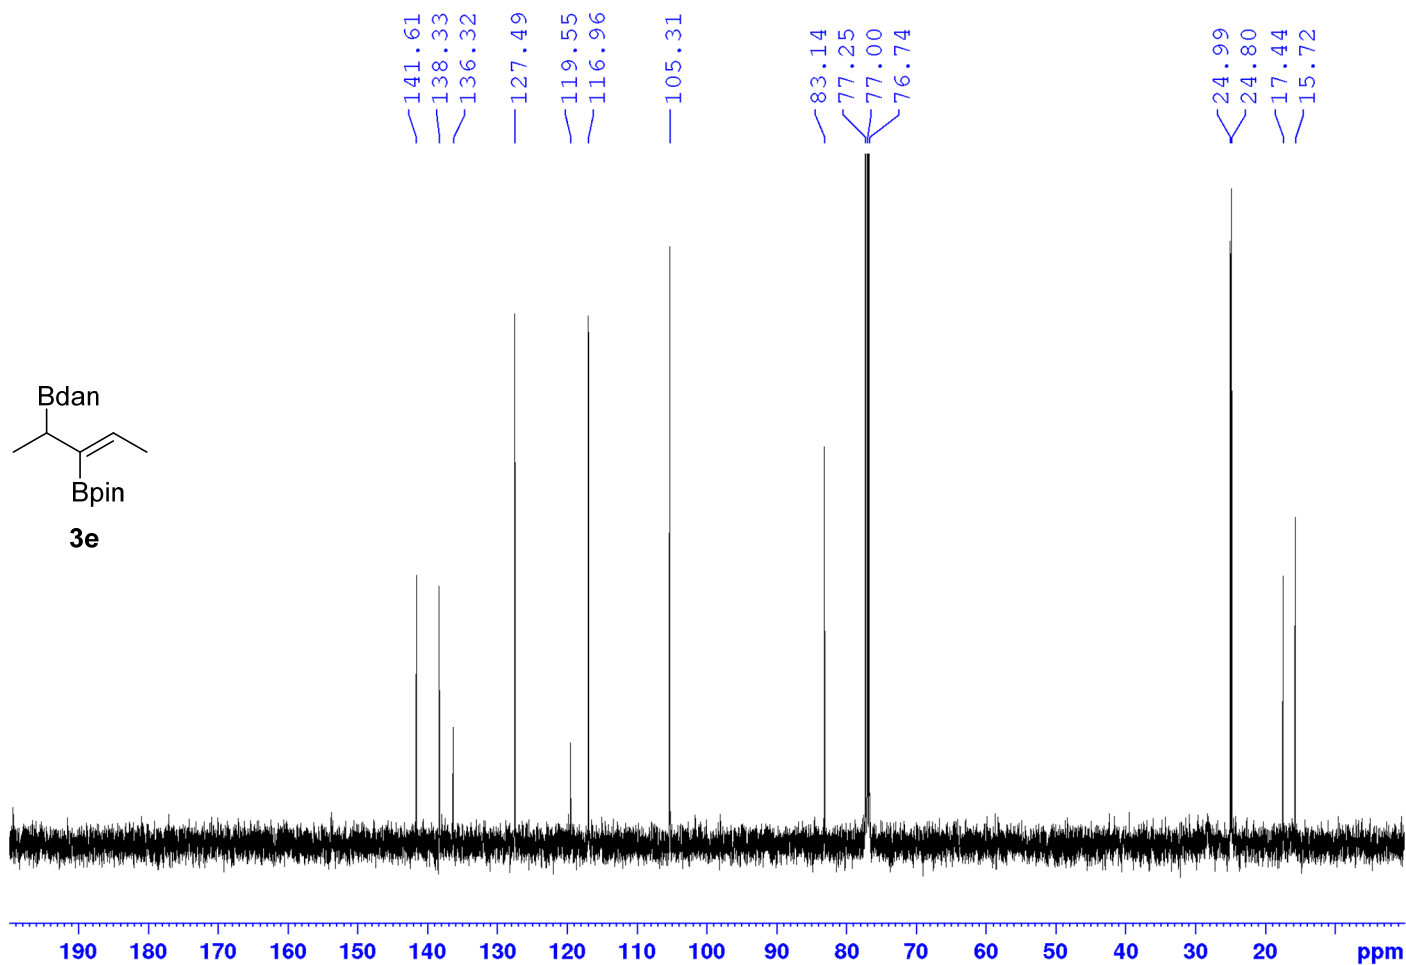

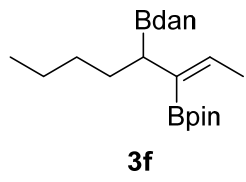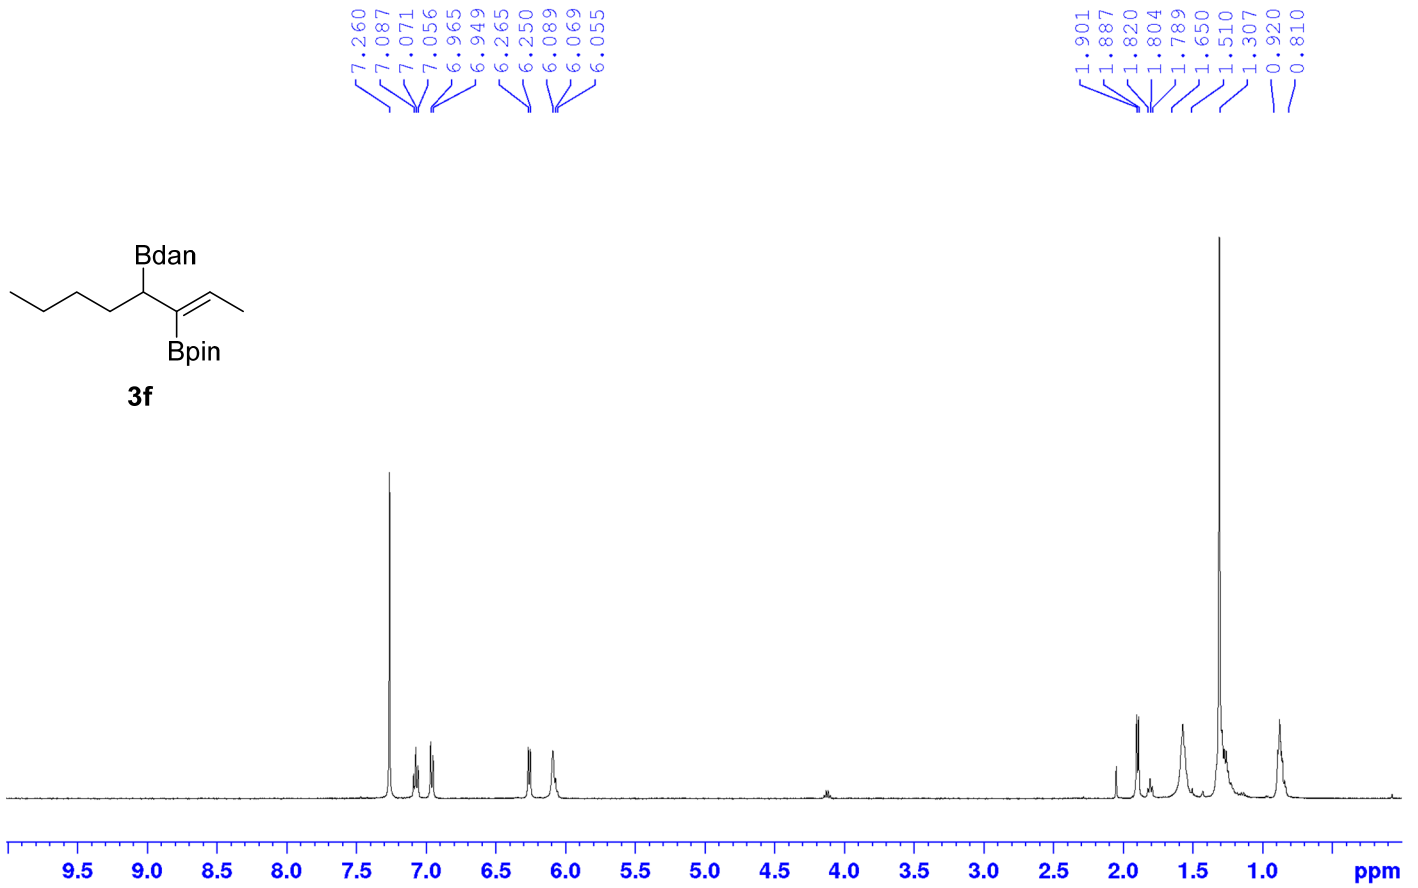

7.260  
 7.087  
 7.071  
 7.056  
 6.965  
 6.949  
 6.265  
 6.250  
 6.089  
 6.069  
 6.055

1.901  
 1.887  
 1.820  
 1.804  
 1.789  
 1.650  
 1.510  
 1.307  
 0.920  
 0.810

2.02  
 2.04  
 2.04  
 2.06  
 1.00

3.06  
 1.06  
 6.06  
 12.04  
 3.01

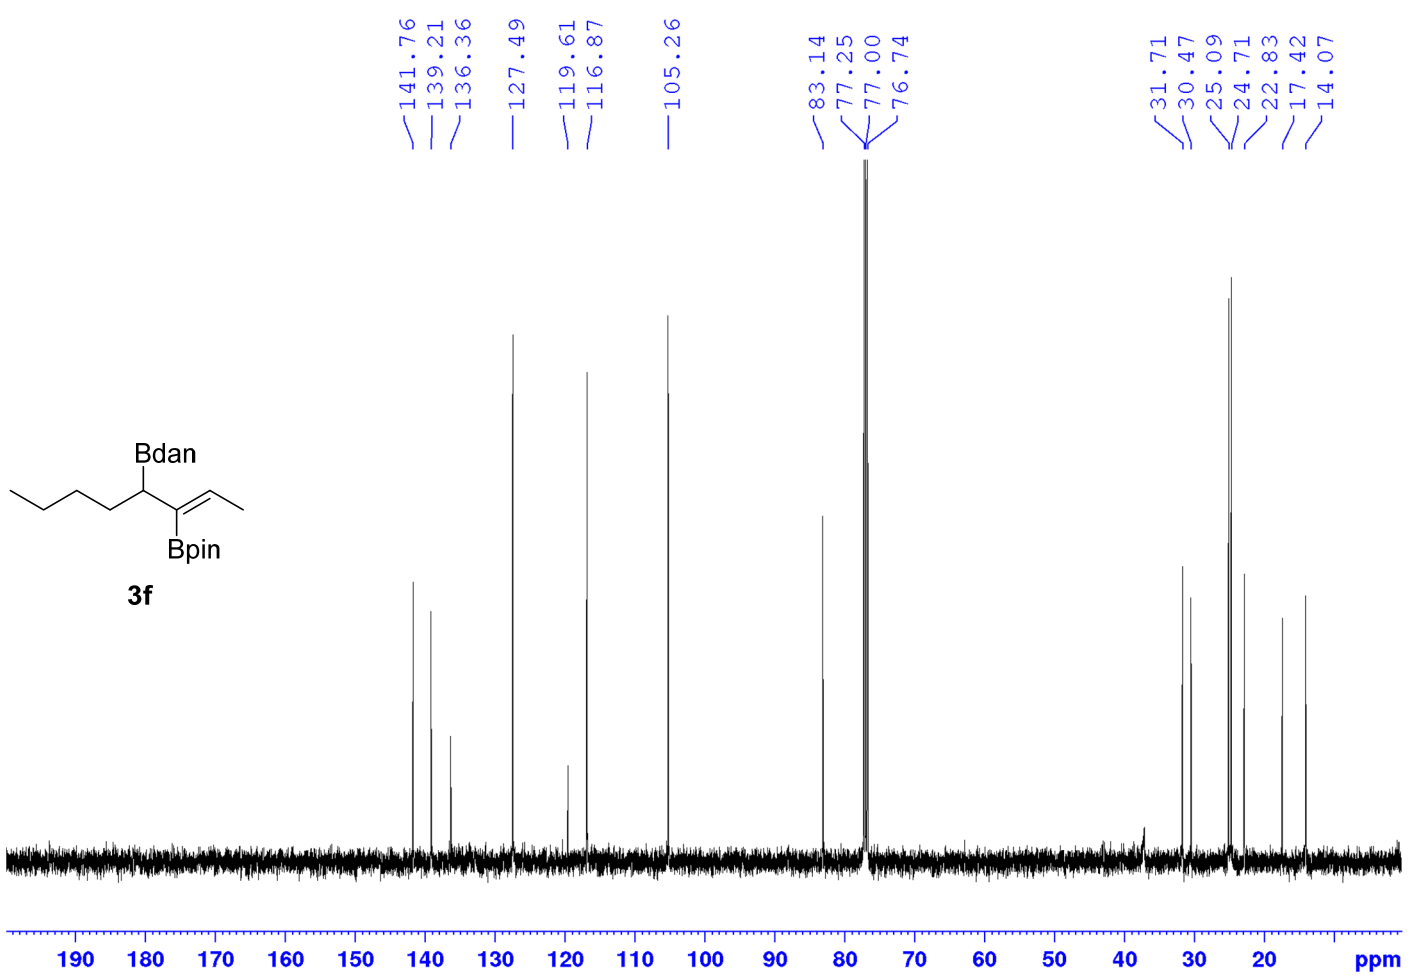

141.76  
 139.21  
 136.36  
 127.49  
 119.61  
 116.87  
 105.26

83.14  
 77.25  
 77.00  
 76.74

31.71  
 30.47  
 25.09  
 24.71  
 22.83  
 17.42  
 14.07

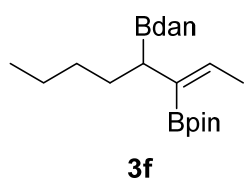

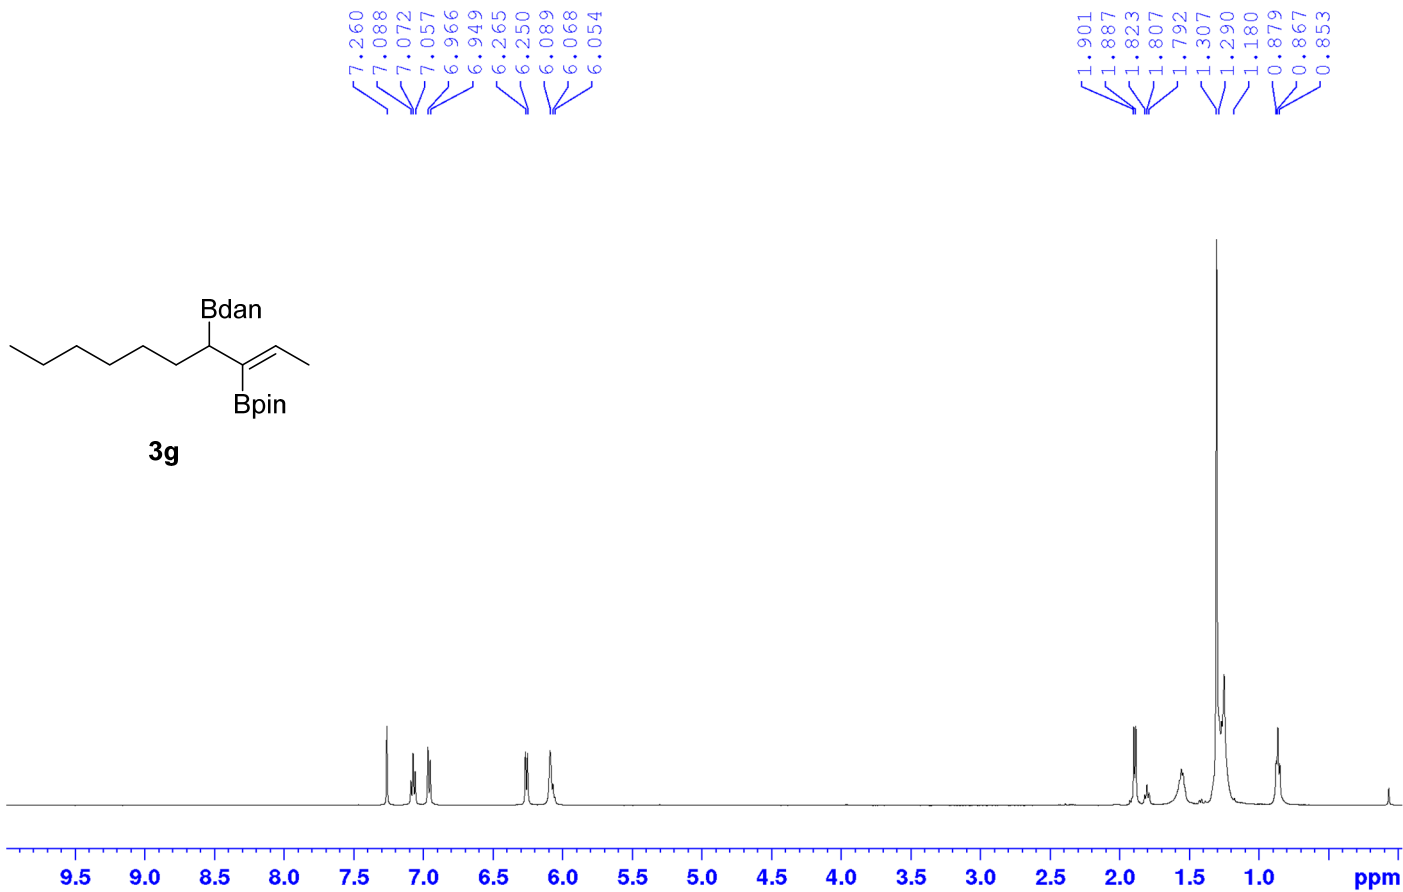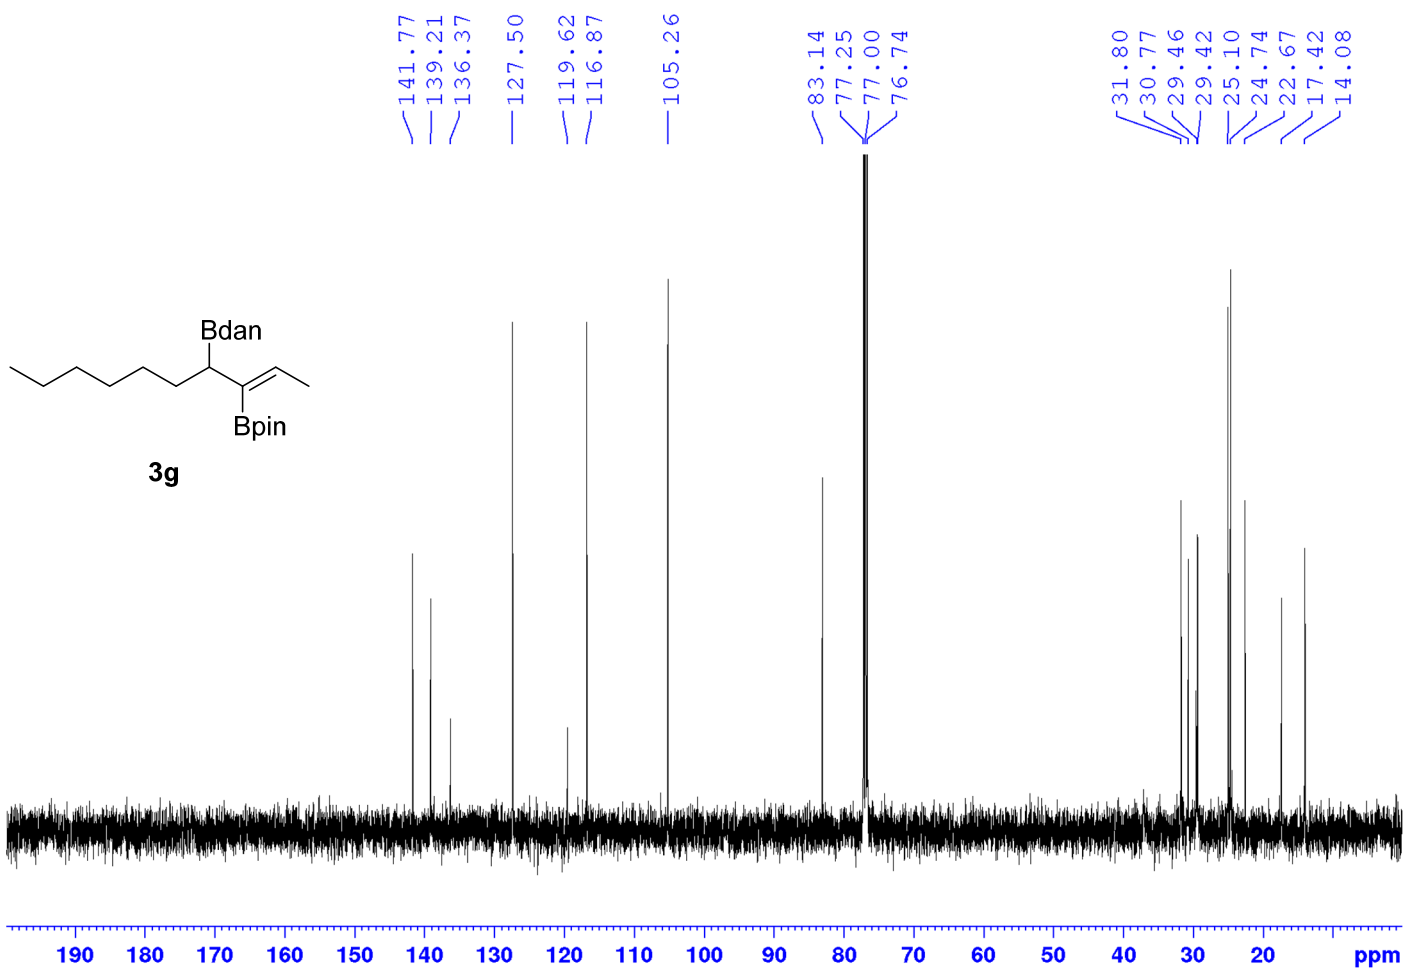



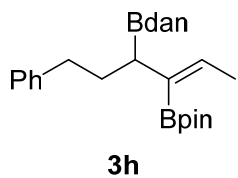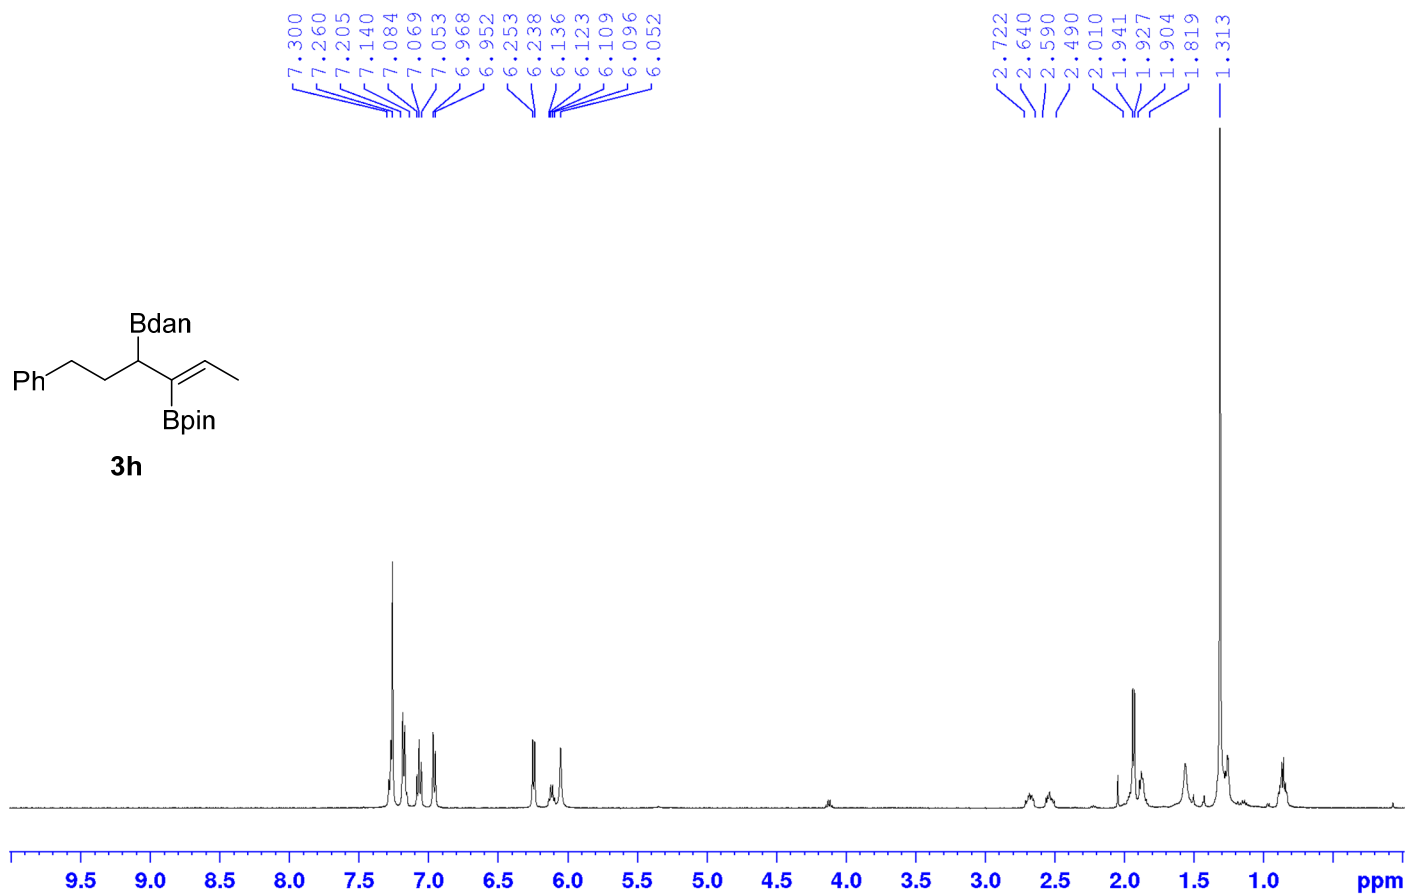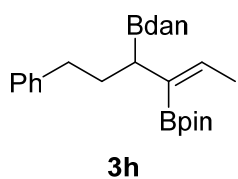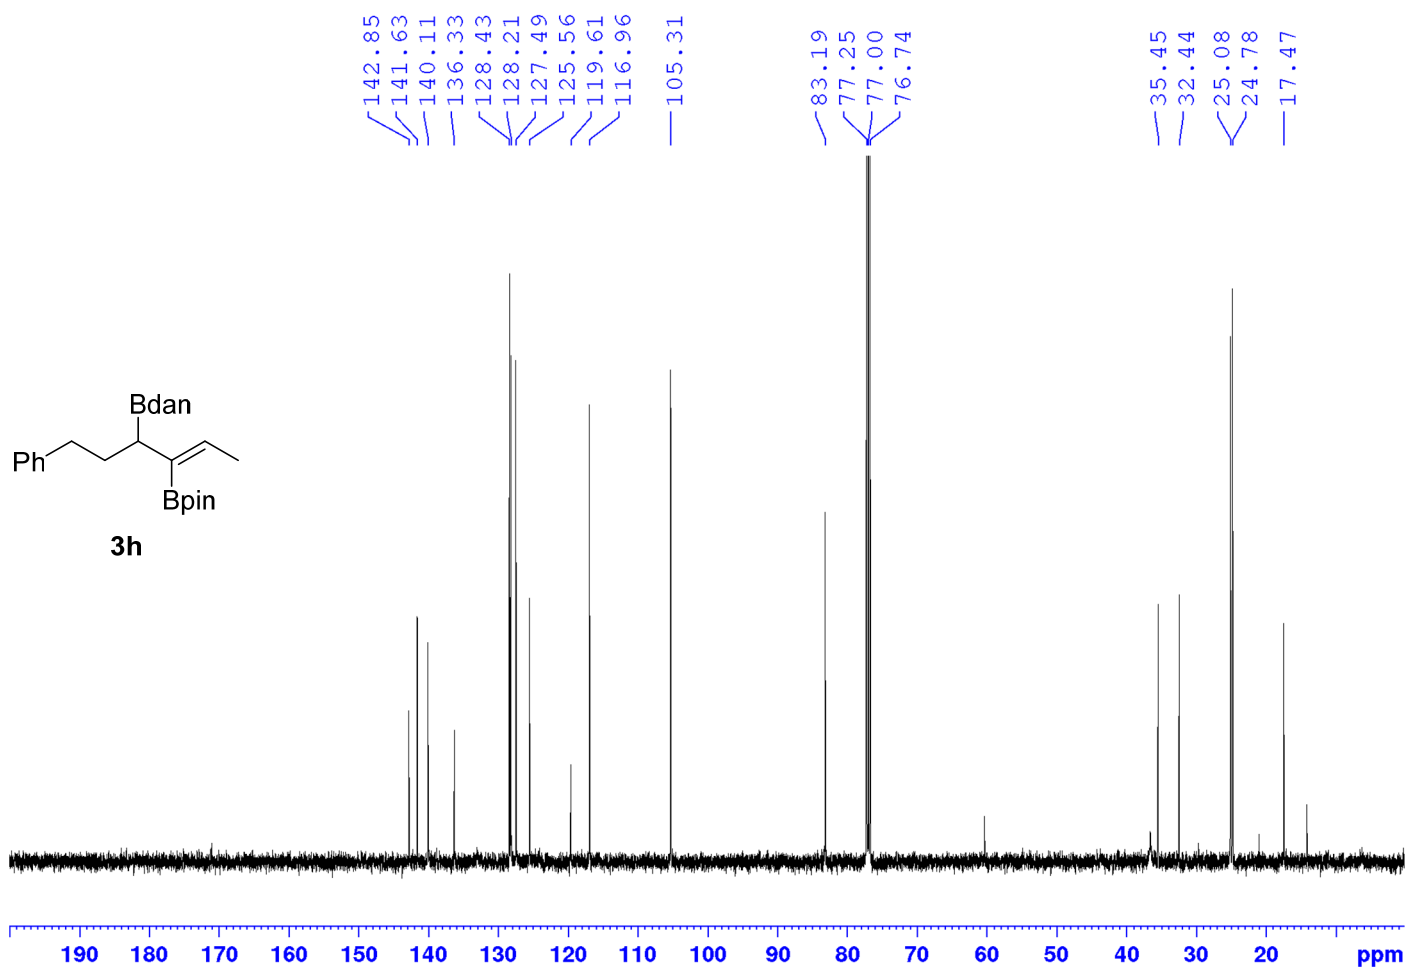

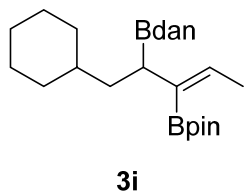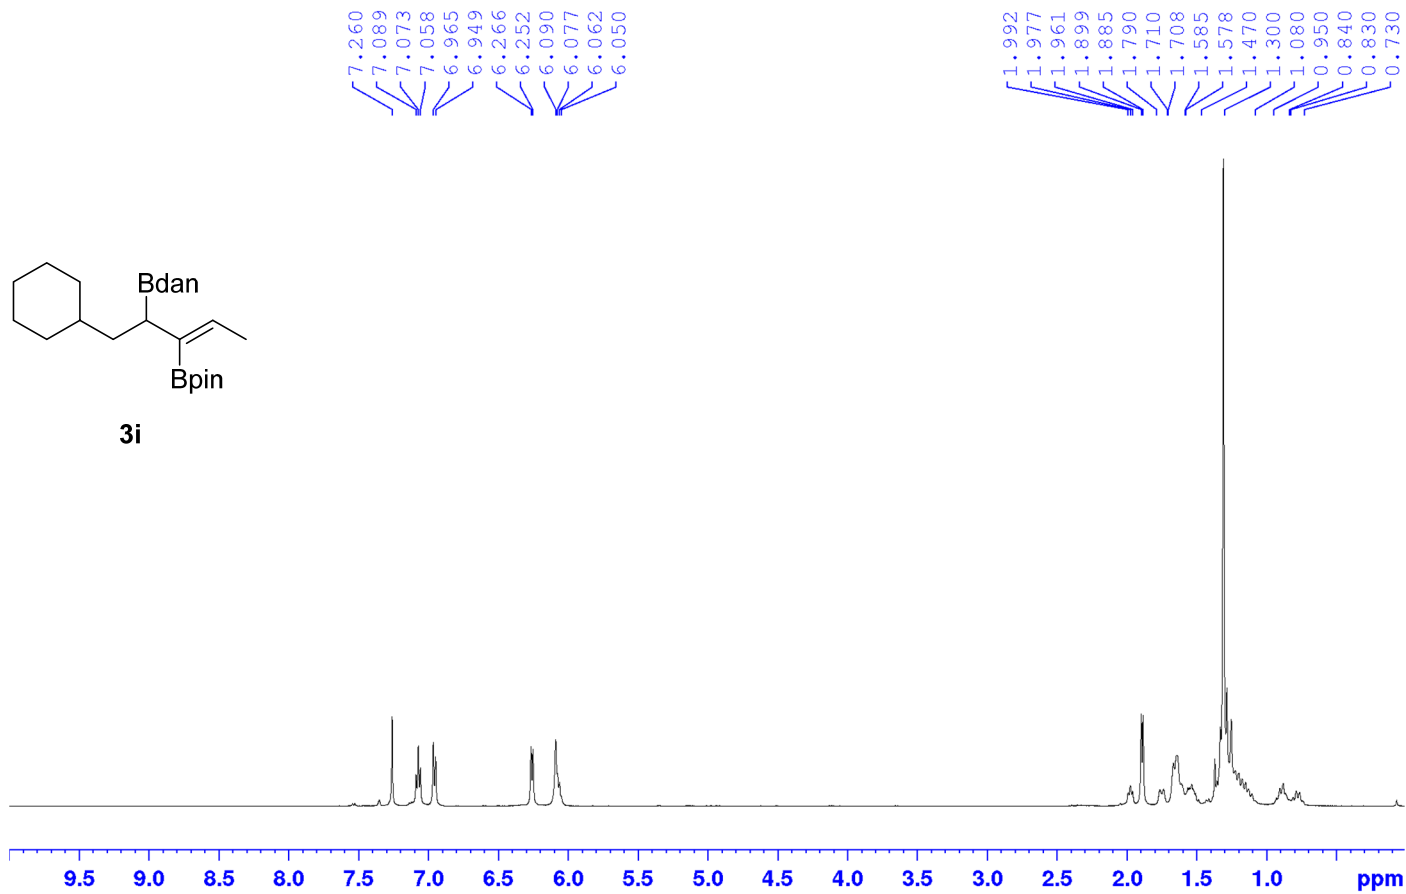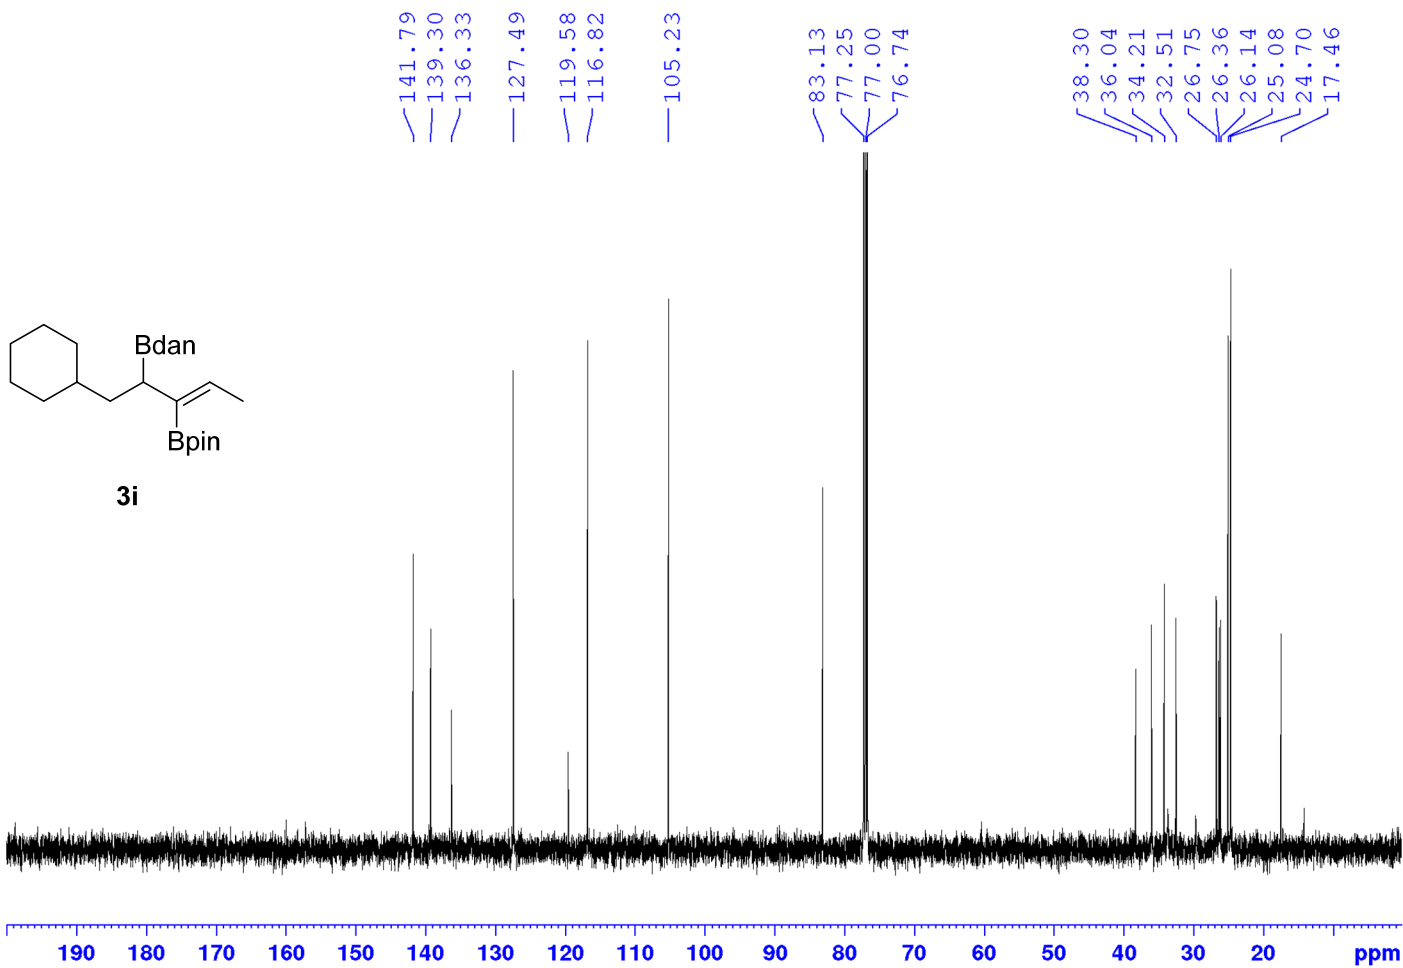

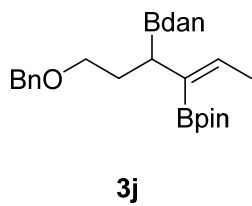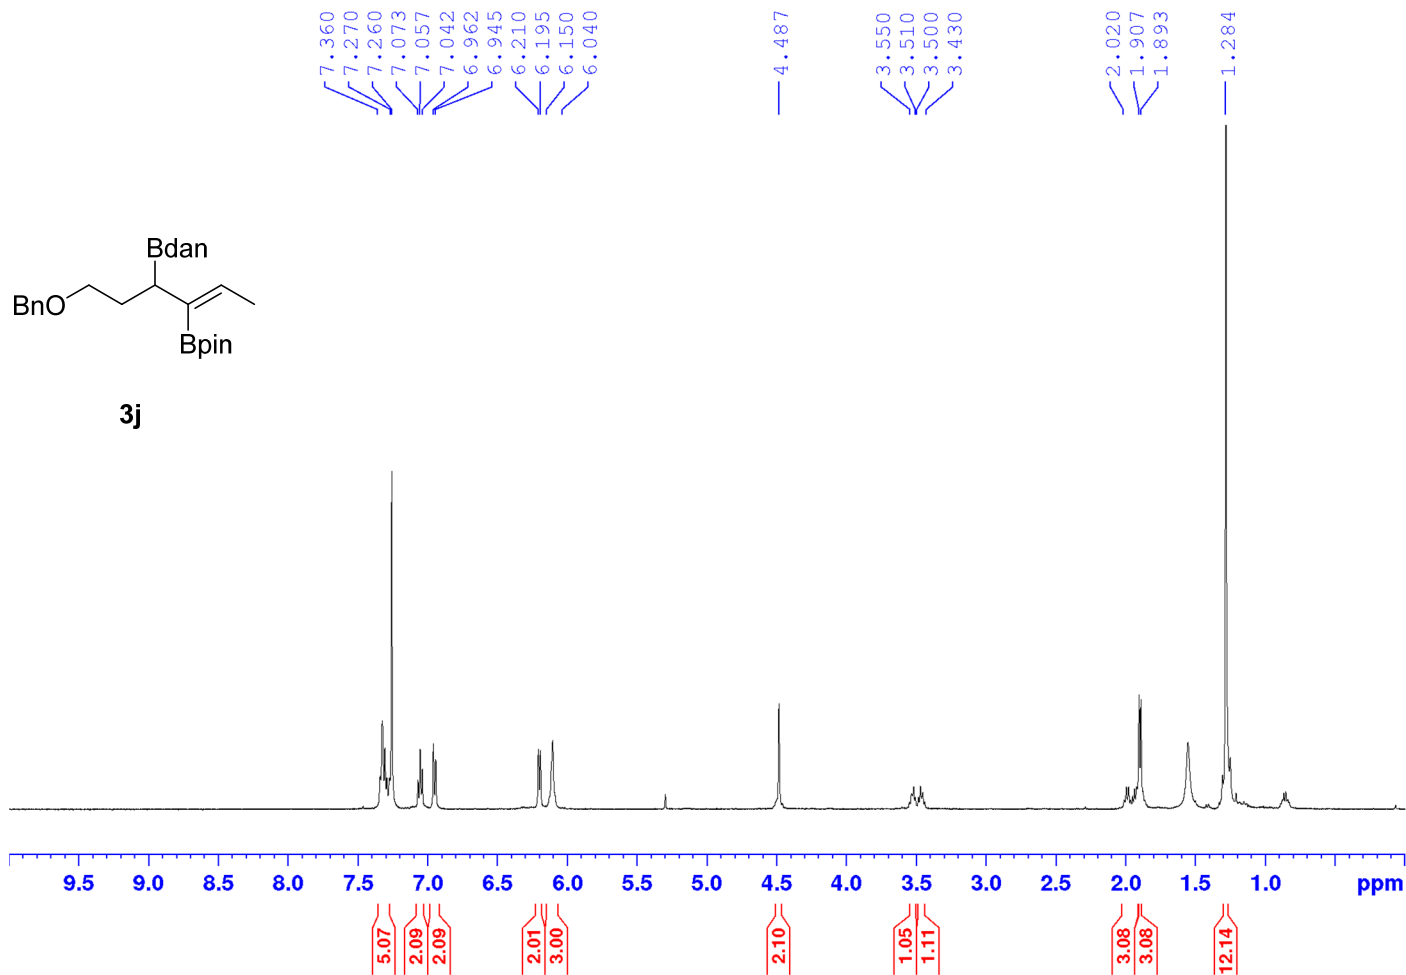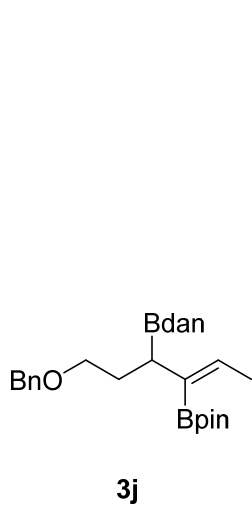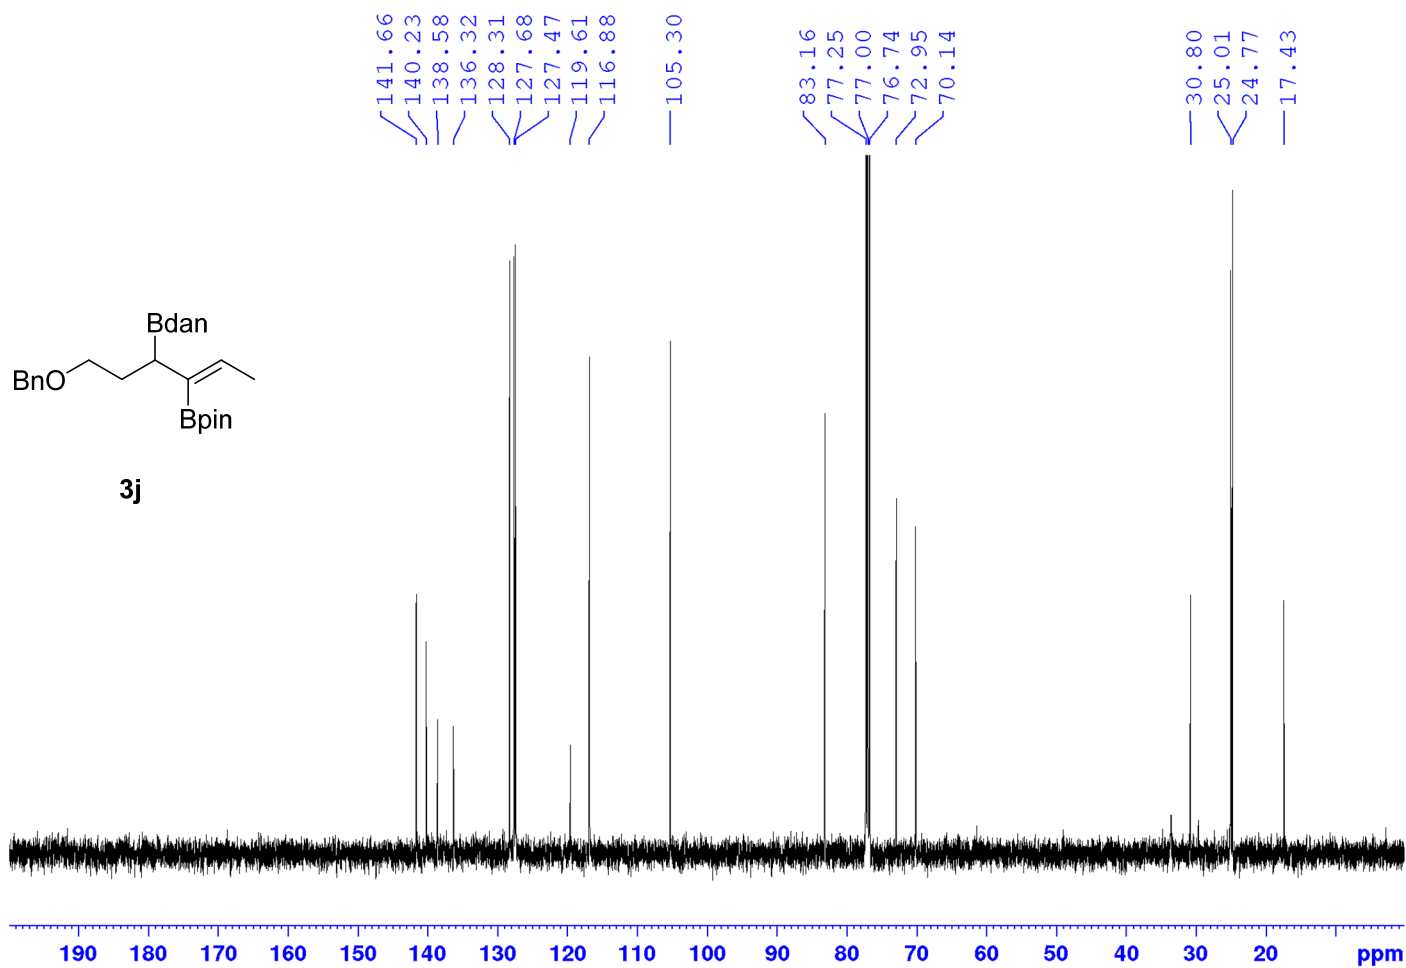

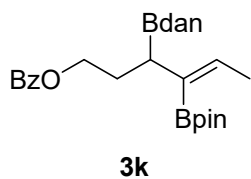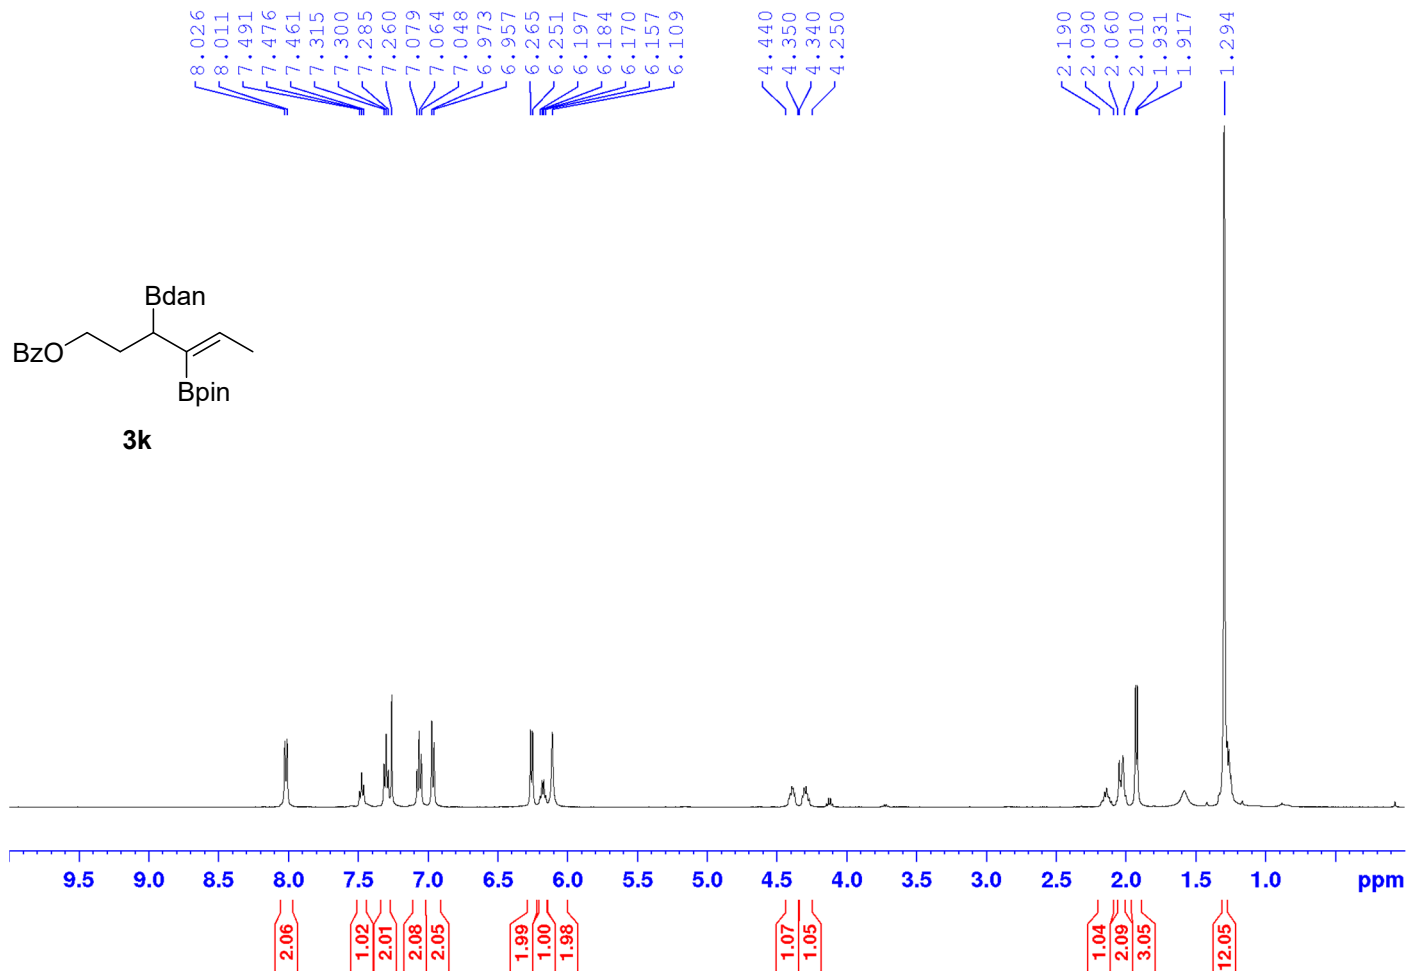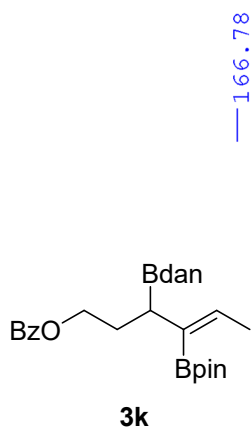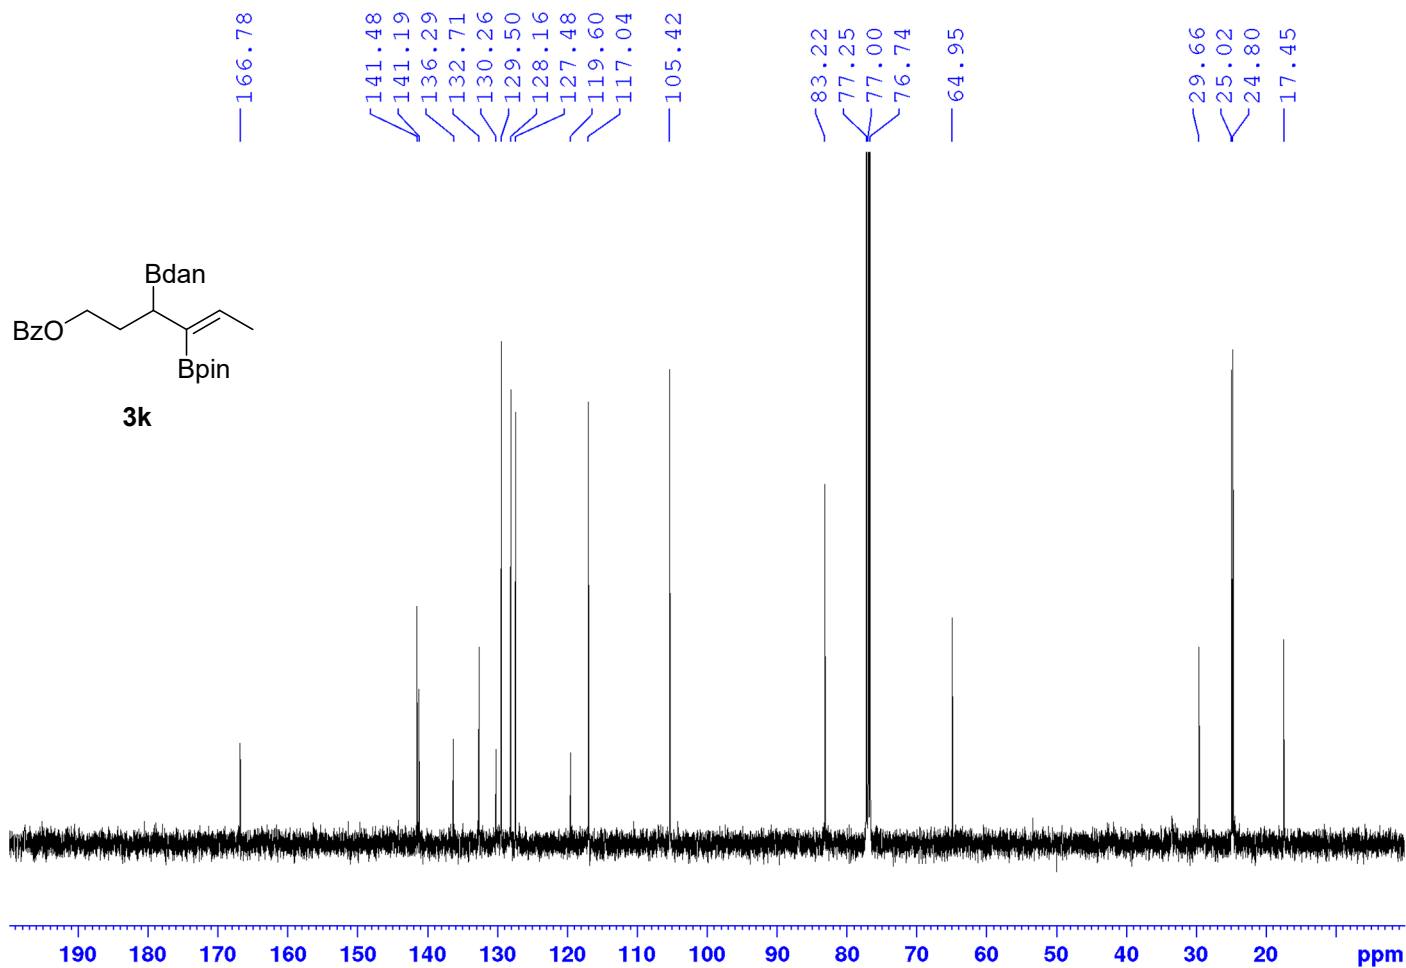

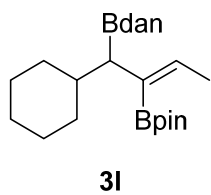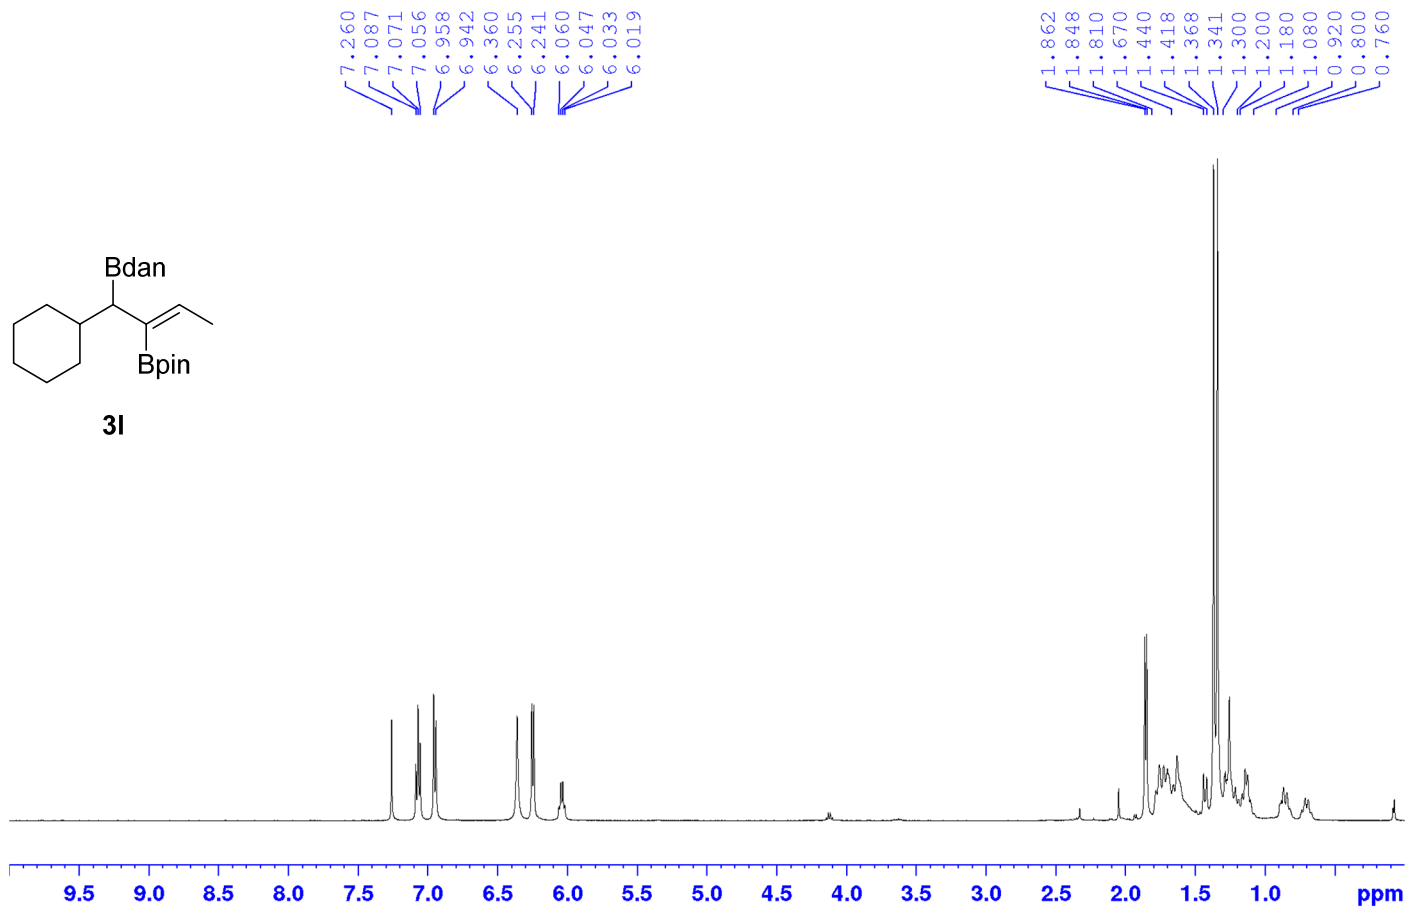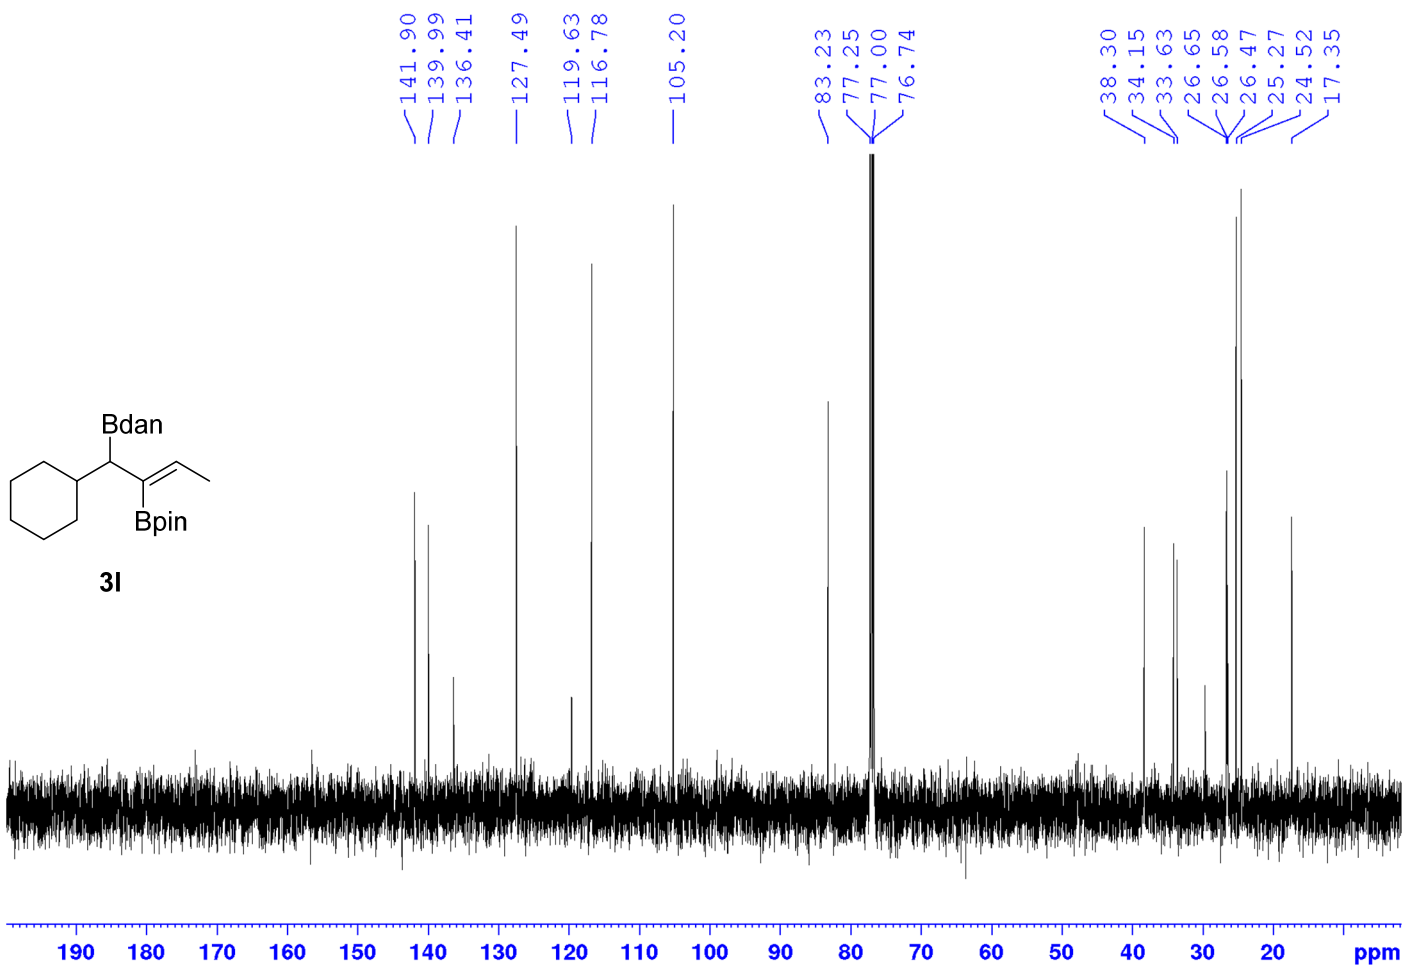

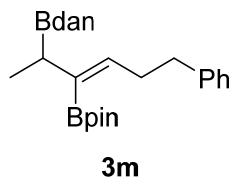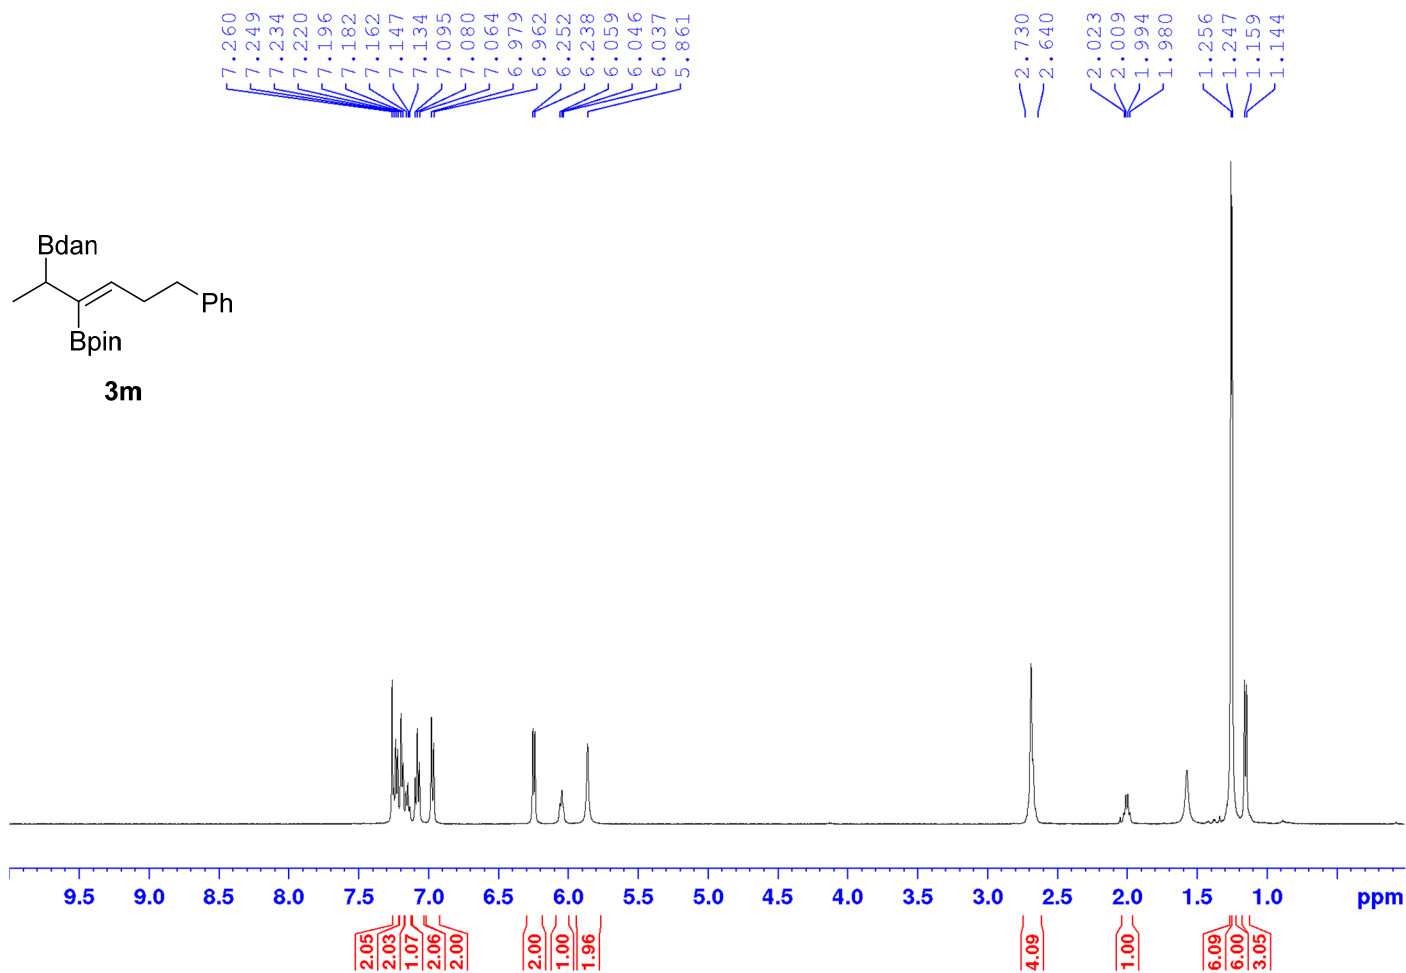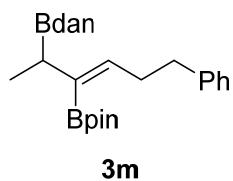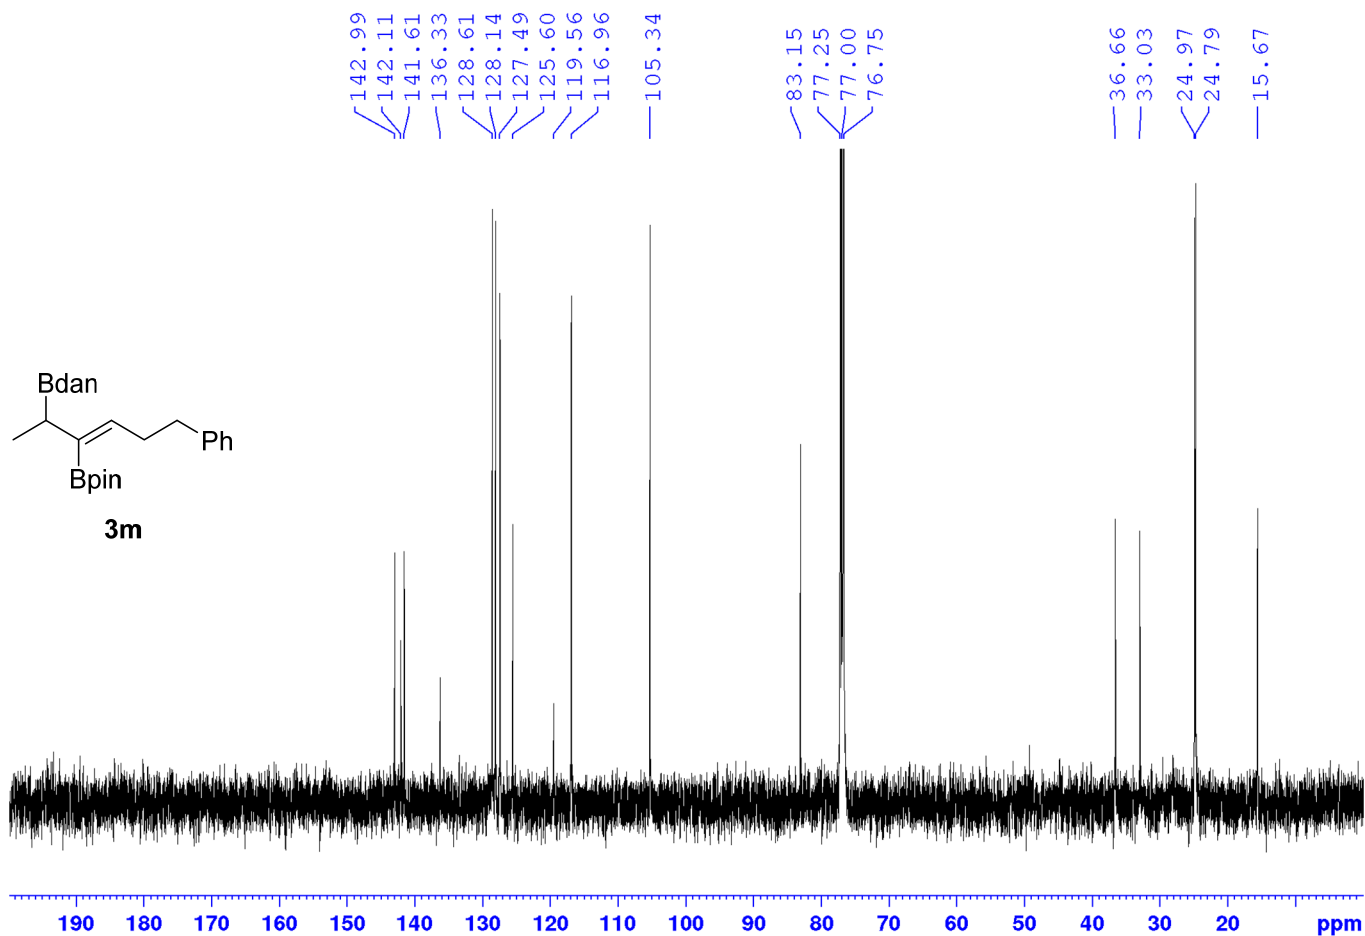

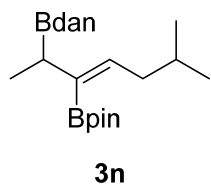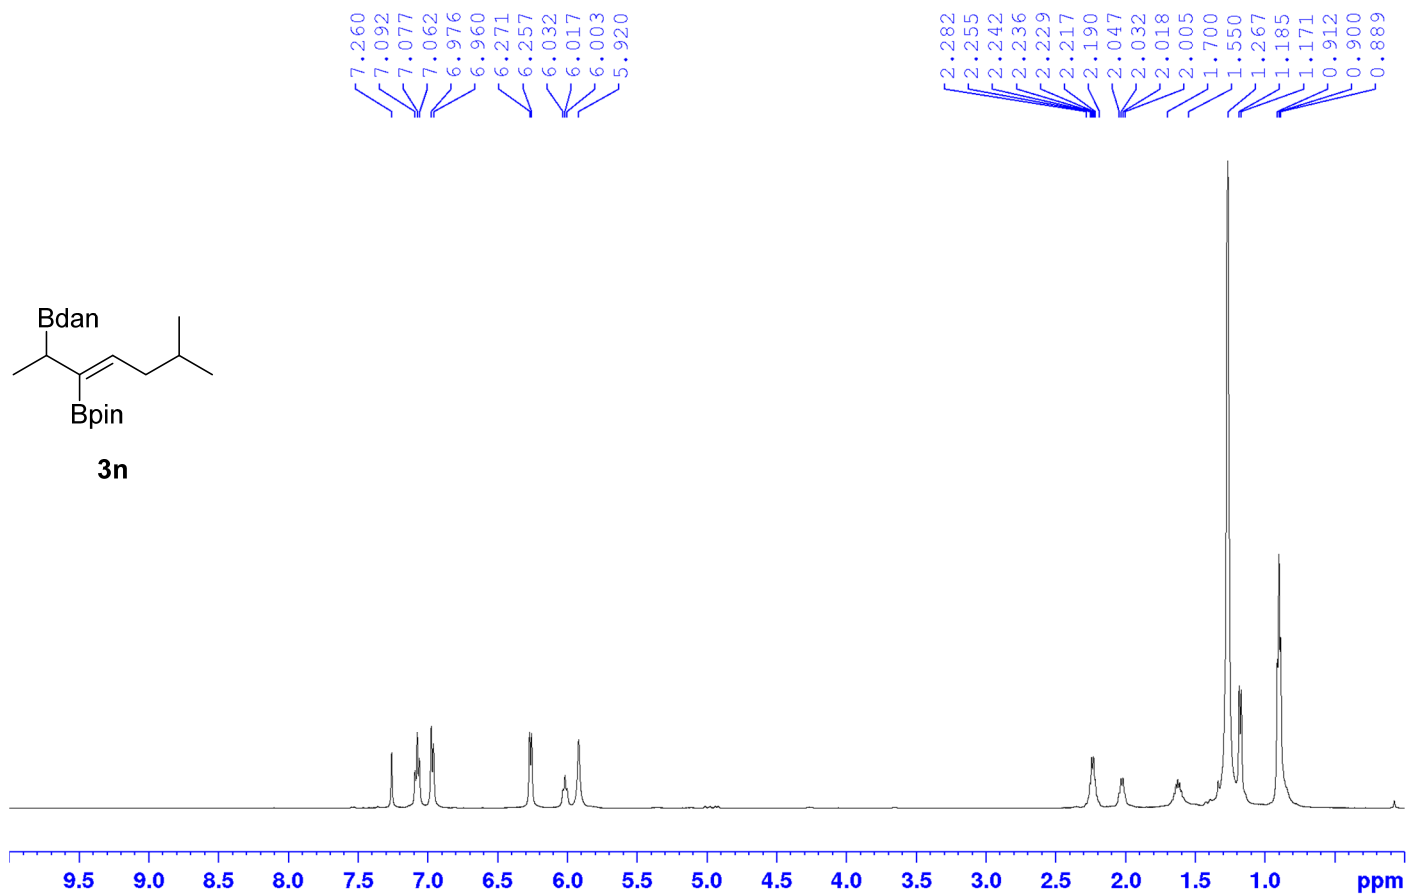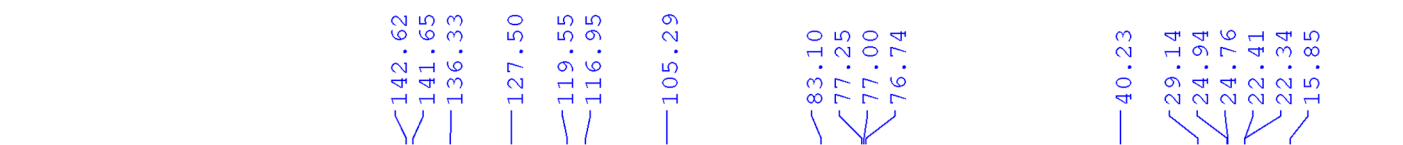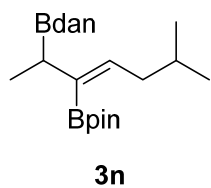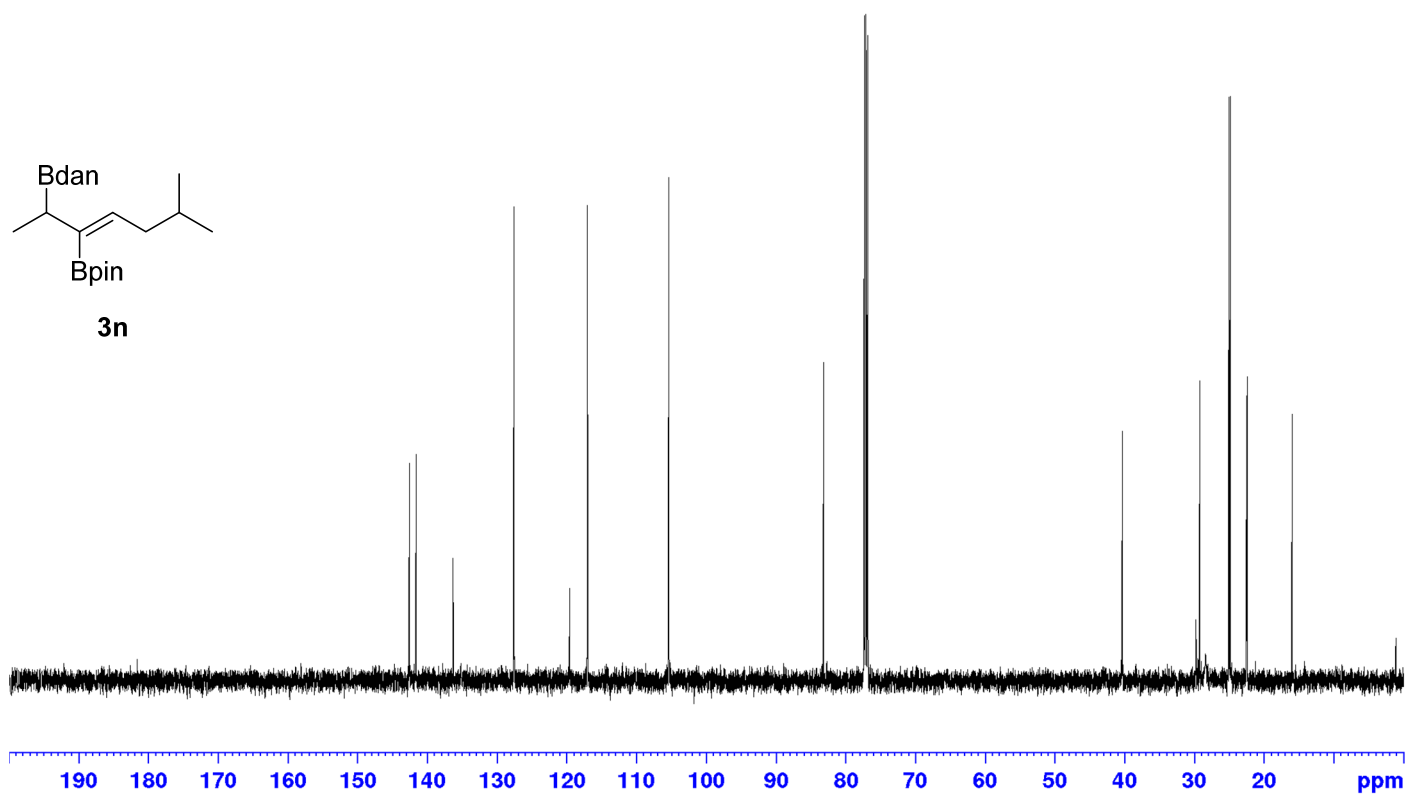

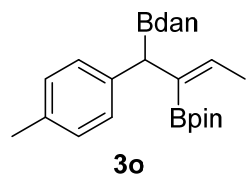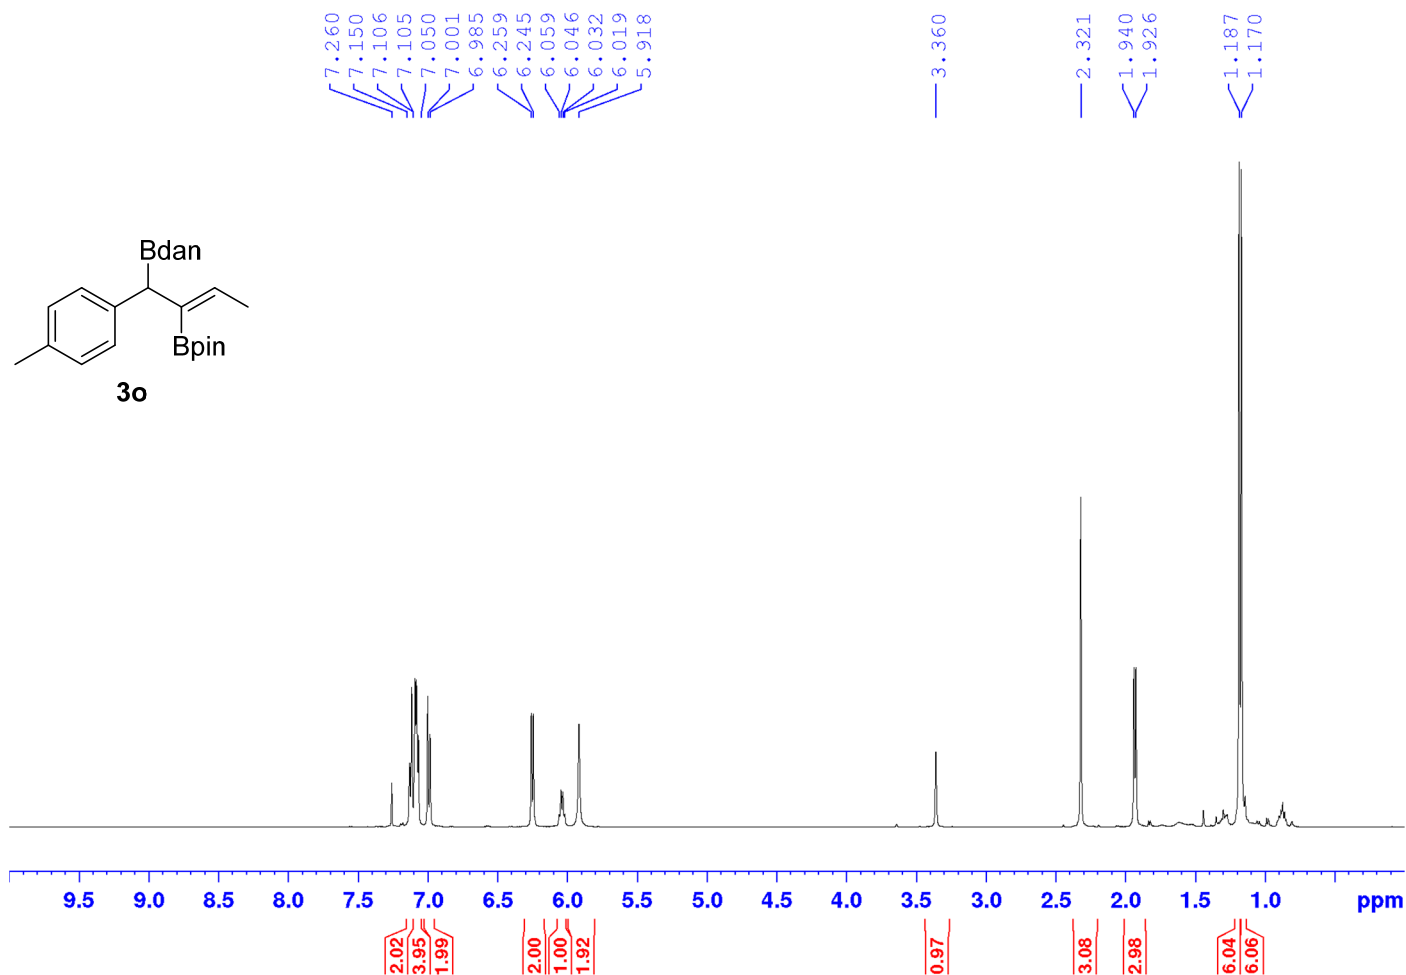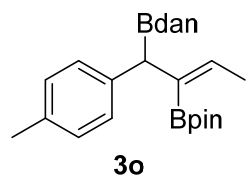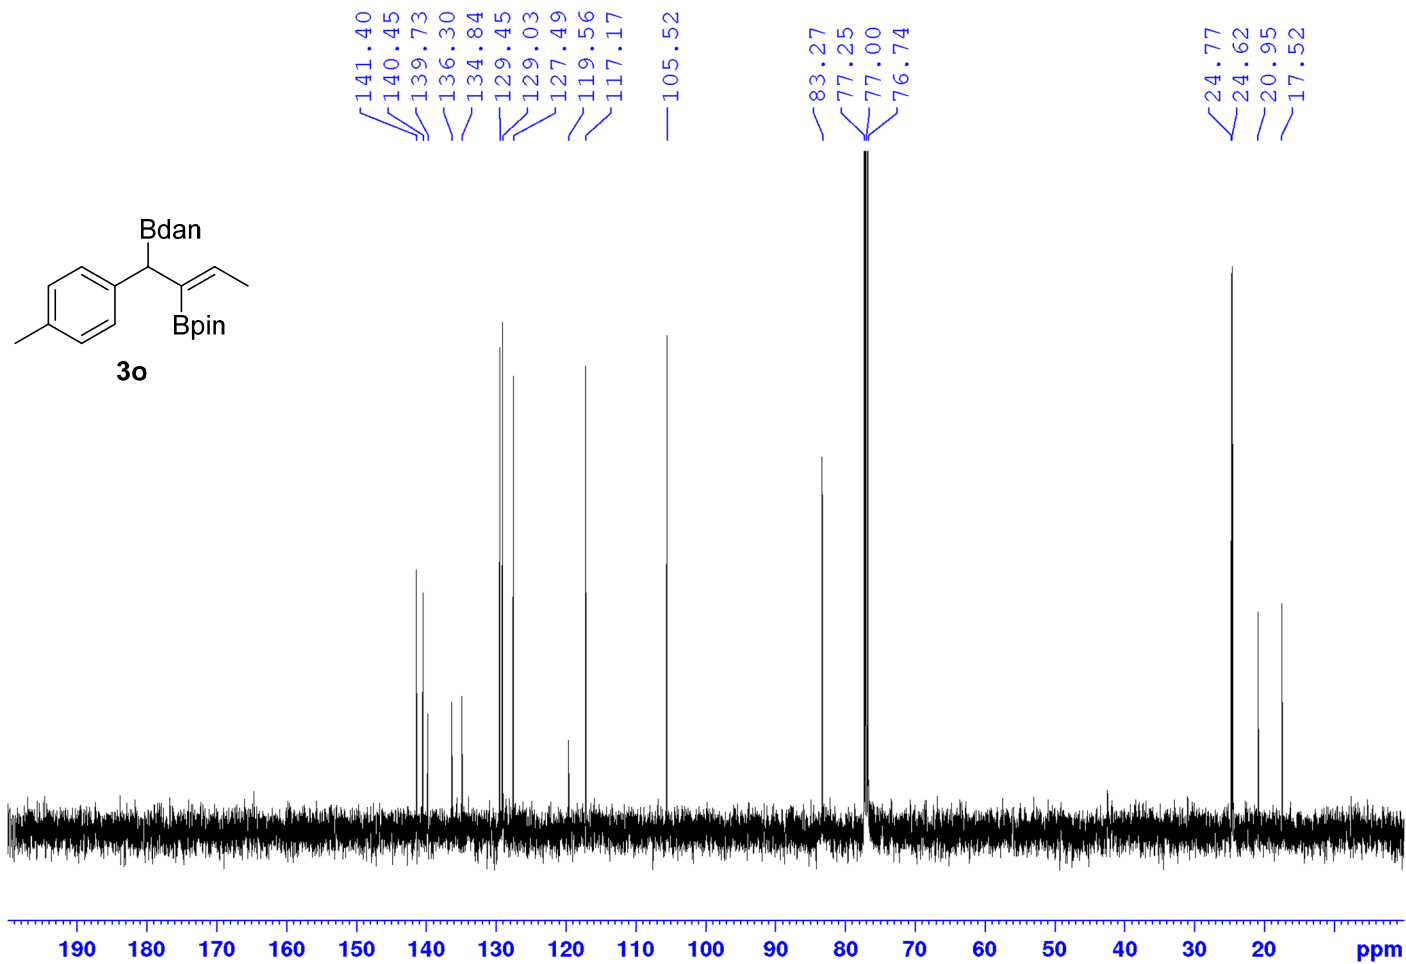



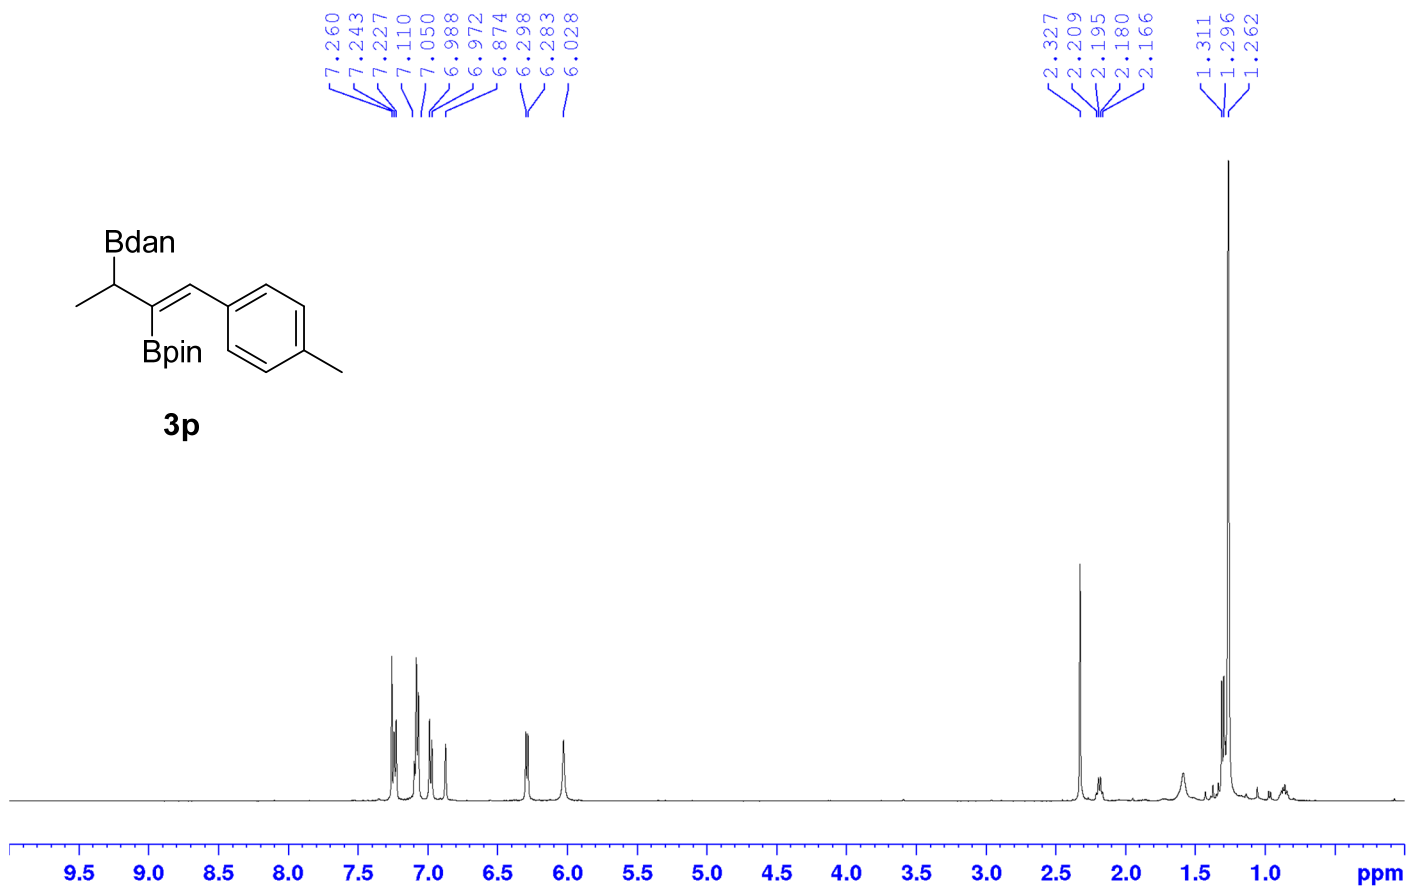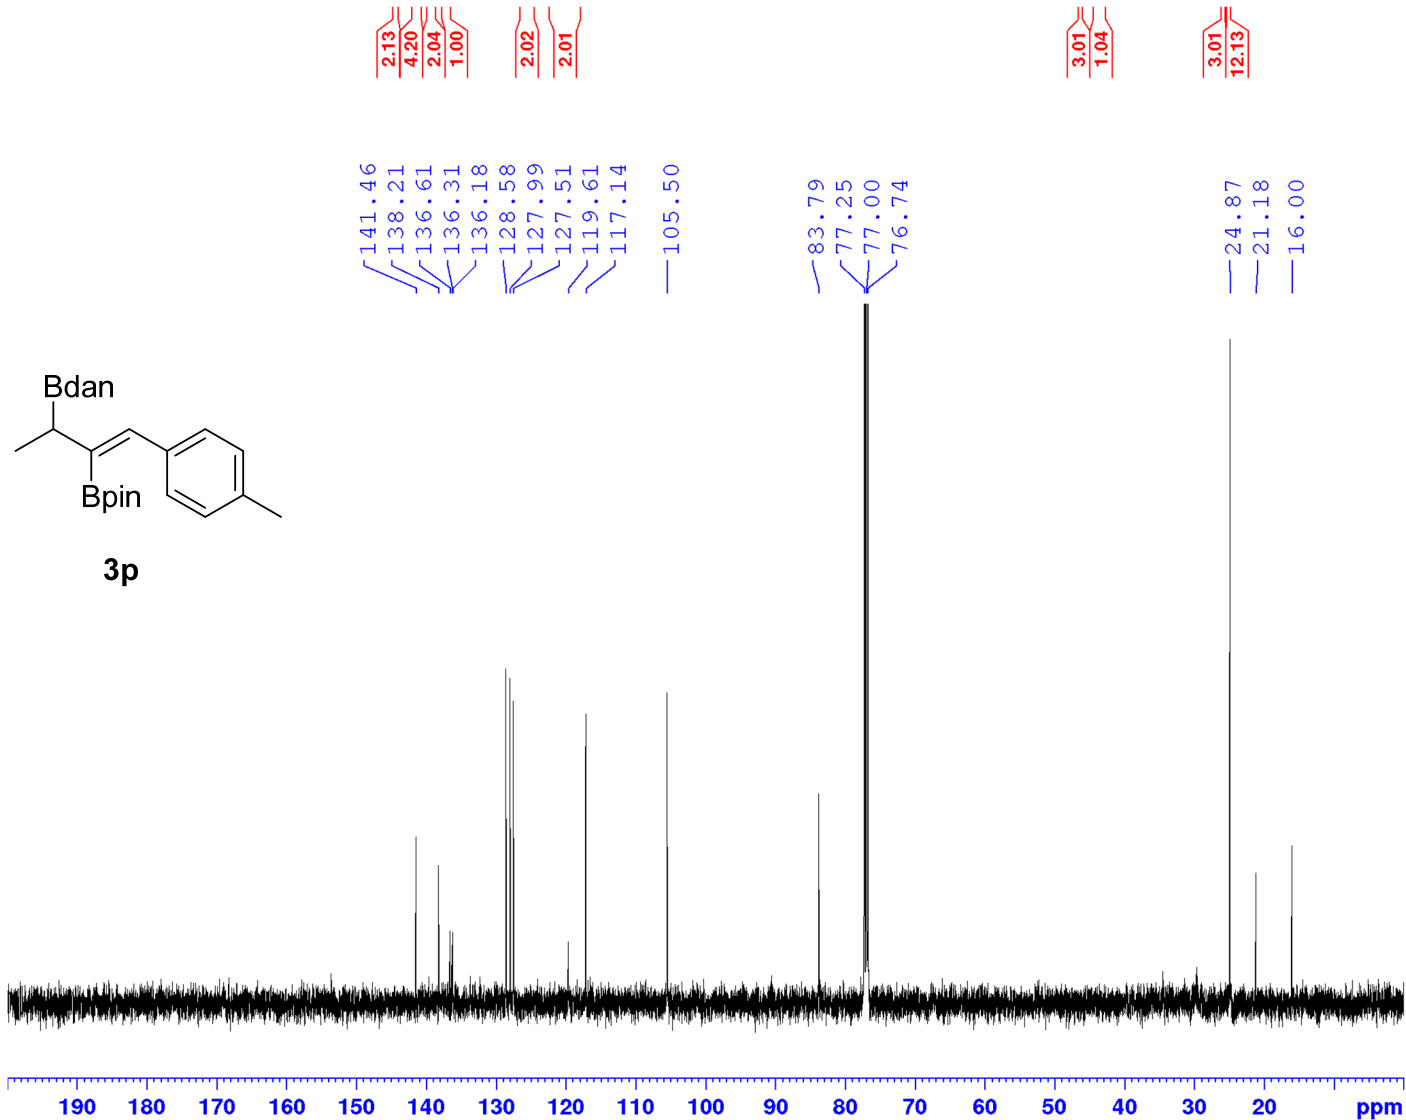

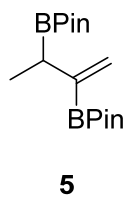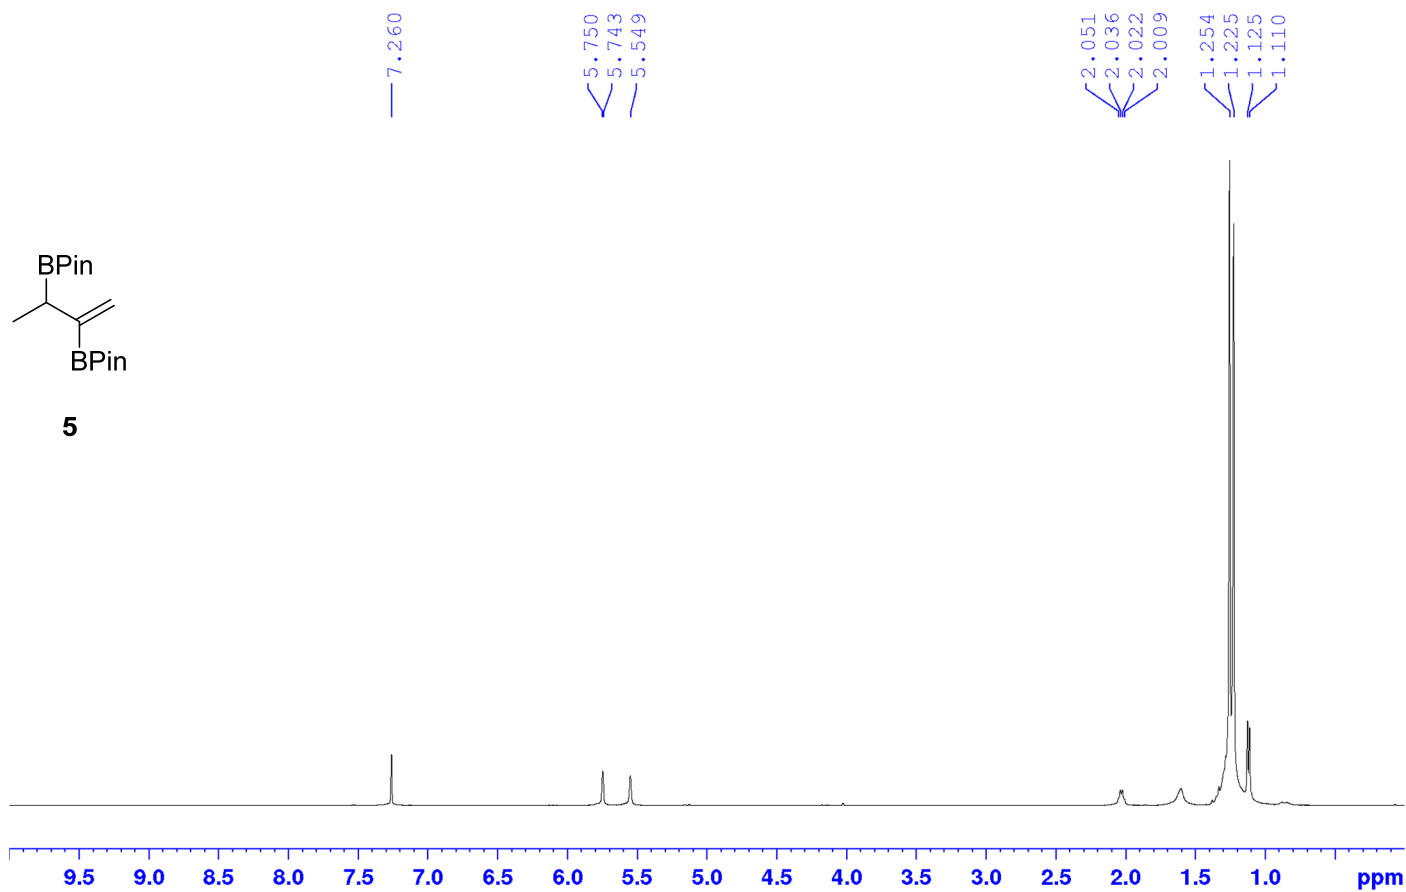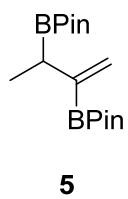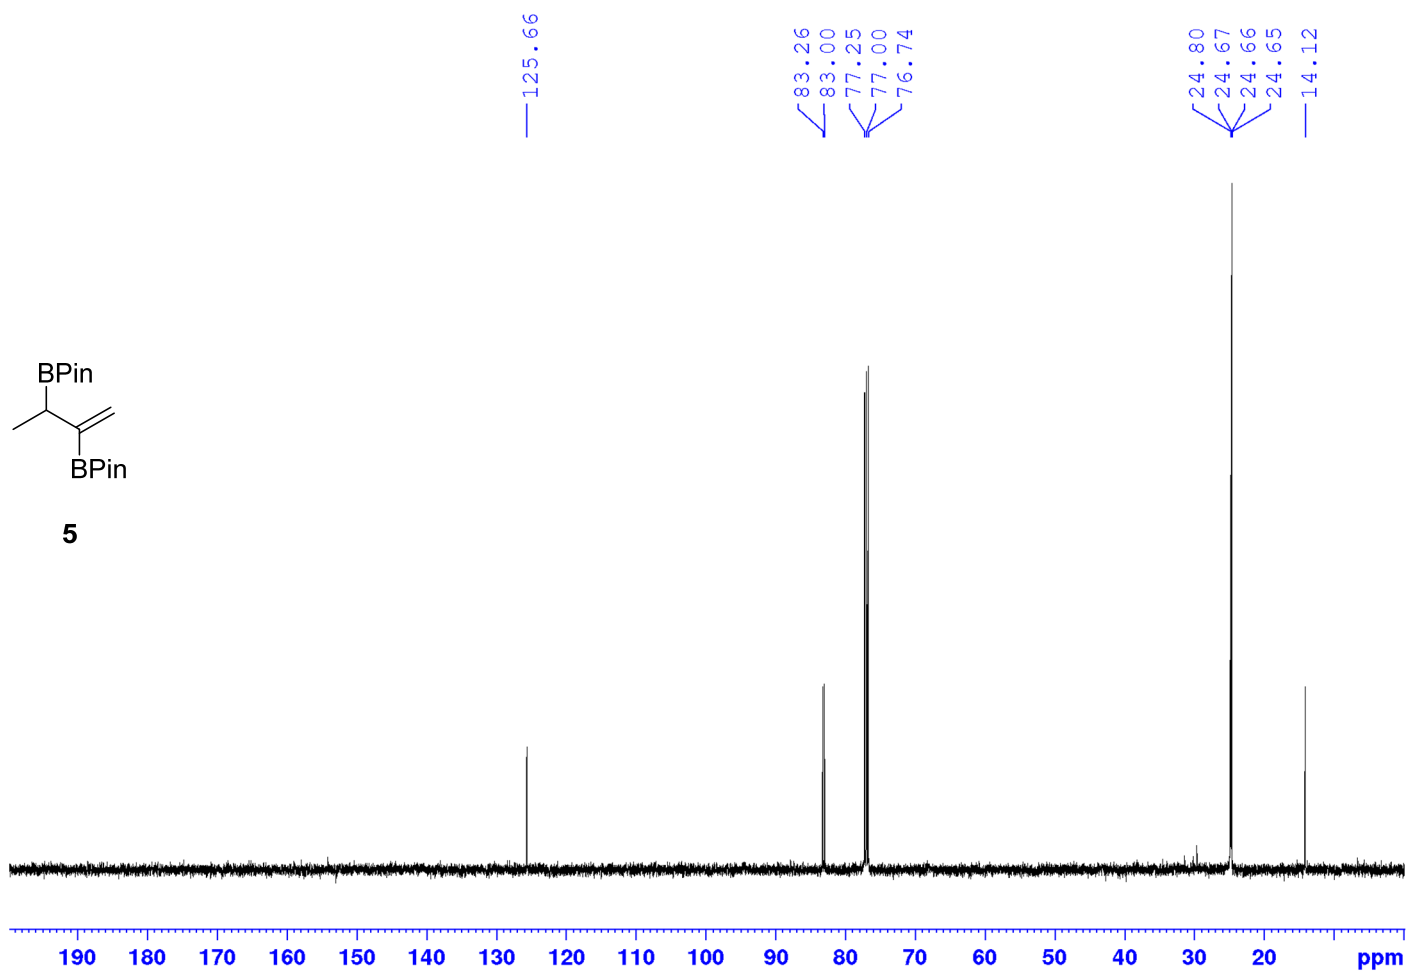

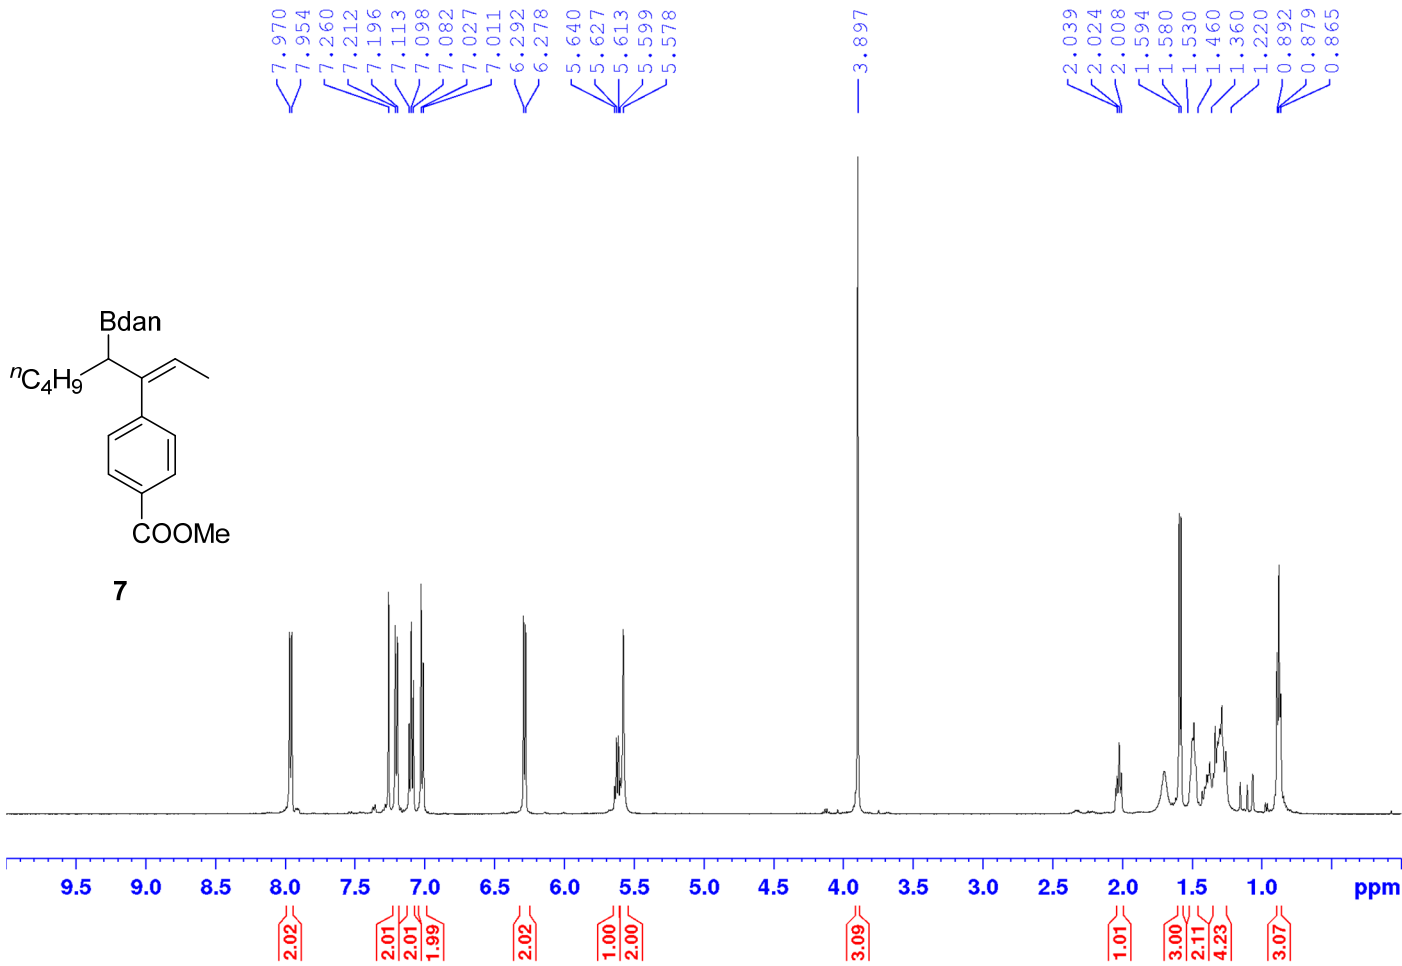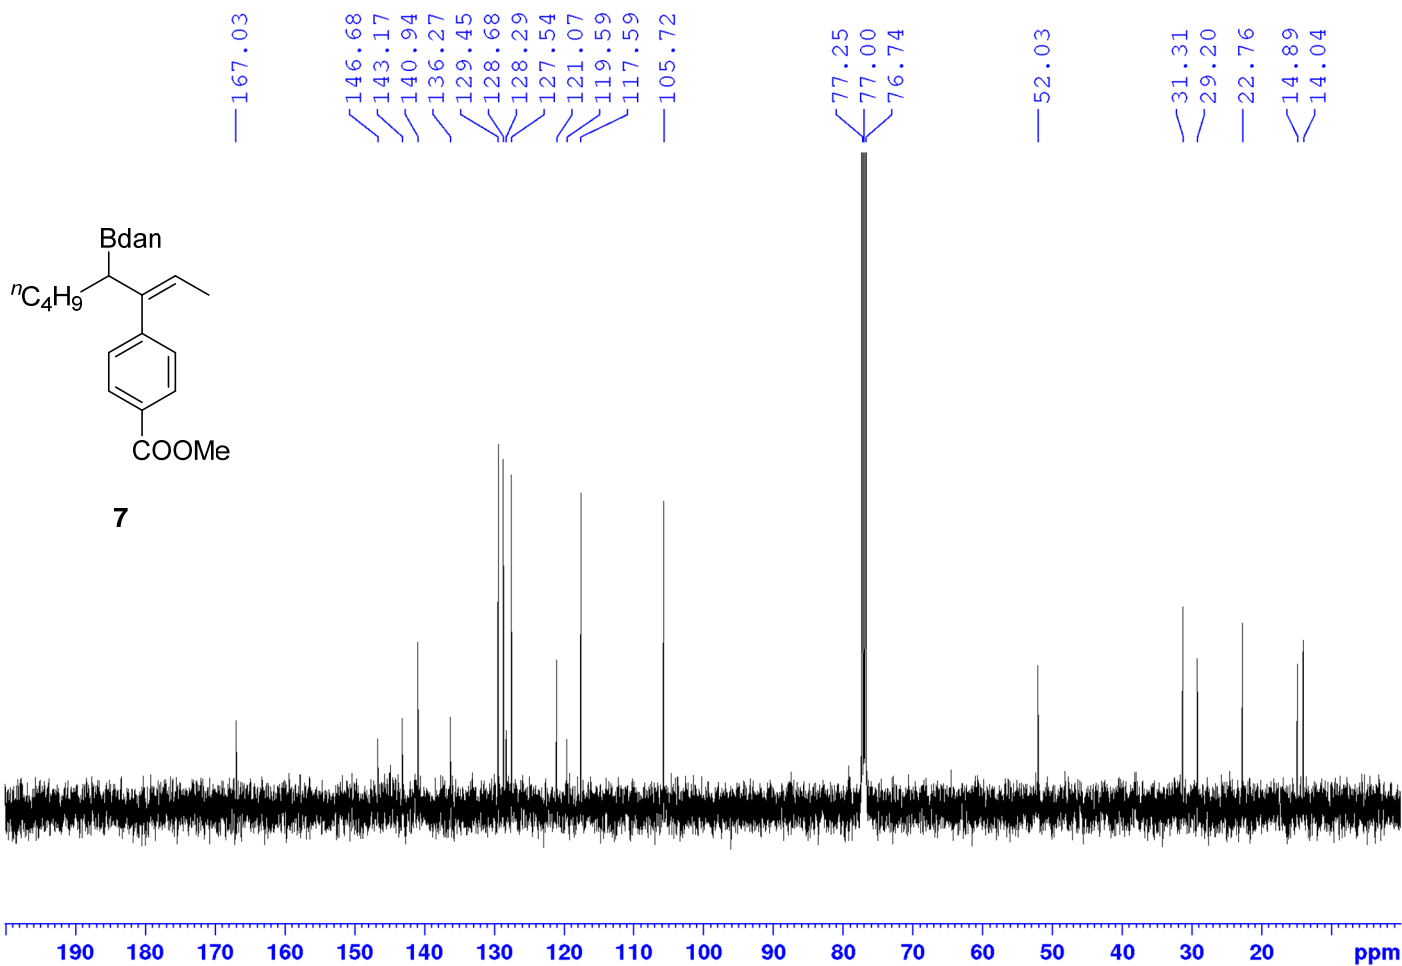

Supplement: d2ob01694j1.pdf [file d2ob01694j1.pdf]
